# Supplementary material for: Electrochemical synthesis of pyridine carboxamides from pyridine carbohydrazides and amines in an aqueous medium
Source: Royal Society of Chemistry journal article supplement (doi:10.1039/d3qo01133j), 2023-01-01

## Supporting Information

### Electrochemical synthesis of pyridine carboxamides from pyridine carbohydrazides and amines in aqueous medium

Peng Qian,<sup>\*a</sup> Yuhan Ma,<sup>a</sup> Kun Yin,<sup>ab</sup> Na Li,<sup>a</sup> Siqi Jiang,<sup>a</sup> Hui Zhang,<sup>a</sup> Liangquan Sheng<sup>\*a</sup>

<sup>a</sup>School of Chemistry and Material Engineering, Engineering Research Center of Biomass Conversion and Pollution Prevention of Anhui Educational Institutions, Anhui Province Key Laboratory for Degradation and Monitoring of Pollution of the Environment, Biomass-derived Functional Oligosaccharides Engineering Technology Research Center of Anhui Province, Fuyang Normal University, Fuyang, Anhui, 236037, P. R. China.

<sup>b</sup>Anhui Laboratory of Molecule-Based Materials, College of Chemistry and Materials Science, Anhui Normal University, Wuhu, Anhui, 241002, P. R. China.

E-mail: qianpeng@mail.ustc.edu.cn shenglq2015@163.com

### Table of Contents

|                                       |     |
|---------------------------------------|-----|
| General Information.....              | S2  |
| Experimental Section.....             | S2  |
| Detail Descriptions for Products..... | S4  |
| Copies of Product NMR Spectra.....    | S19 |

## General Information:

All products were characterized by  $^1\text{H}$  NMR and  $^{13}\text{C}$  NMR, using TMS as an internal reference ( $^1\text{H}$  NMR: 400 MHz,  $^{13}\text{C}$  NMR: 100 MHz). HRMS (ESI) data were recorded on a Q-TOF Premier. Flash column chromatography was performed using silica gel (200-300 mesh). All the compounds **1** and **2** were purchased from commercial supplies and used without purification.

## Experimental Section

**Representative Procedures for the Synthesis of Pyridine Carboxamides Except for Isonicotinamide and Picolinamide (3 as an Example):** An undivided cell was equipped with a magnet stirrer, two platinum plates (1.0 x 1.0 cm<sup>2</sup>) electrodes as the working electrode and counter electrode. In the electrolytic cell, a mixture of isonicotinohydrazide **1** (0.3 mmol, 41.1 mg, 1.0 equiv), amines **2** (0.6 mmol, 2.0 equiv), KI (0.30 mmol, 49.8 mg, 1.0 equiv), EtOH/H<sub>2</sub>O (2.5/0.5 mL) was allowed to stir and electrolyze at a constant current condition (10 mA) at 40 °C. After the reaction was completed (about 8 h), the solvent was removed with a rotary evaporator and the residue was purified by column chromatography on silica gel to afford the desired product **3**. The product was dried under high vacuum for at least 0.5 h before it was weighed and characterized by NMR spectroscopy.

**Representative Procedures for the Synthesis of Isonicotinamide and Picolinamide:** An undivided cell was equipped with a magnet stirrer, two platinum plates (1.0 x 1.0 cm<sup>2</sup>) electrodes as the working electrode and counter electrode. In the electrolytic cell, a mixture of isonicotinohydrazide or picolinohydrazide (0.3 mmol, 41.1 mg, 1.0 equiv), KI (0.30 mmol, 49.8 mg, 1.0 equiv), EtOH/NH<sub>3</sub>·H<sub>2</sub>O (2.5/0.5 mL) was allowed to stir and electrolyze at a constant current condition (10 mA) at 40 °C. After the reaction was completed (about 8 h), the solvent was removed with a rotary evaporator and the residue was purified by column chromatography on silica gel to afford the desired product **35** or **38**. The product was dried under high vacuum for at least 0.5 h before it was weighed and characterized by NMR spectroscopy.

**Gram-Scale Synthesis of 3:** An undivided cell was equipped with a magnet stirrer, two platinum plates (1.5 x 1.5 cm<sup>2</sup>) electrodes as the working electrode and counter electrode. In the electrolytic cell, a mixture of isonicotinohydrazide **1** (6 mmol, 822.8 mg, 1.0 equiv), phenylmethanamine (12 mmol, 1285.8 mg, 2.0 equiv), KI (6 mmol, 996.0 mg, 1.0 equiv),

EtOH/H<sub>2</sub>O (50/10 mL) was allowed to stir and electrolyze at a constant current condition (23 mA) at 40 °C. After the reaction was completed (about 72 h), the solvent was removed with a rotary evaporator and the residue was purified by column chromatography on silica gel to afford the desired product **3**. The product was dried under high vacuum for at least 0.5 h before it was weighed and characterized by NMR spectroscopy (890 mg, 70%).

**Photographic Depiction of the Electrolysis Setup (3 as an Example):**

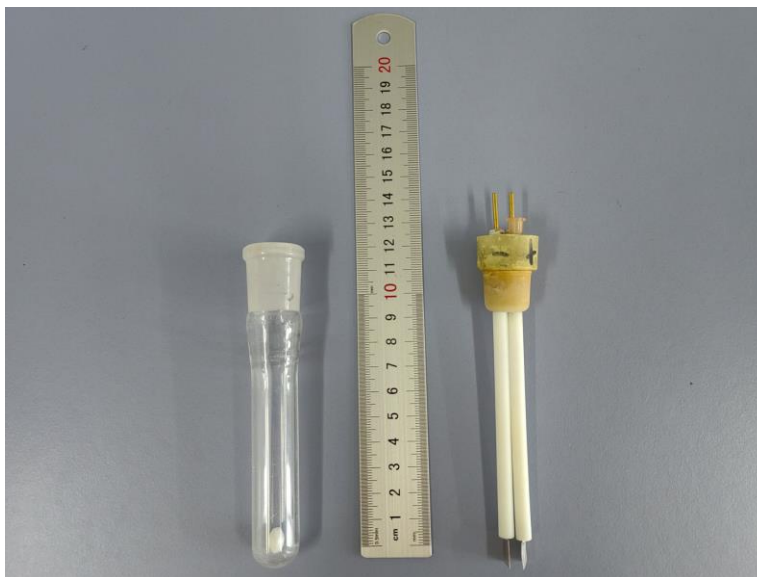

**Figure S1** Electrodes and electrolysis cell

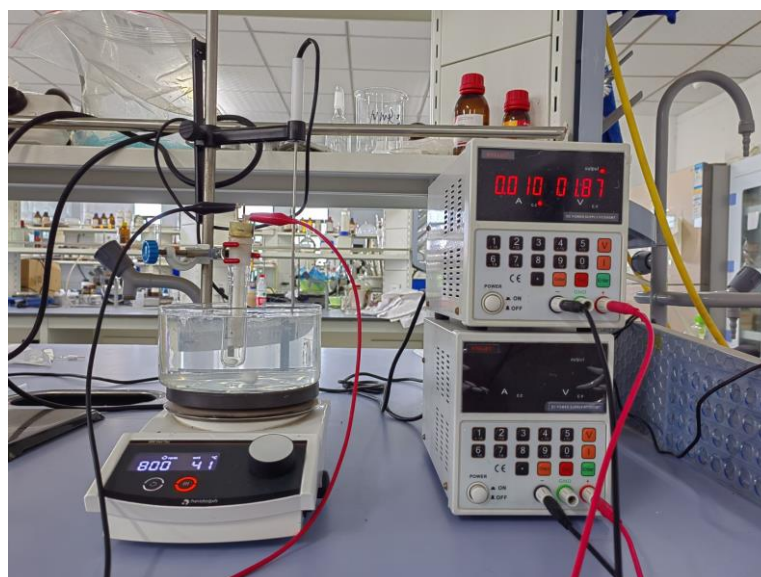

**Figure S2** Electrolysis setup

## Detail Descriptions for Products

### *N*-benzylisonicotinamide (**3**)<sup>1</sup>

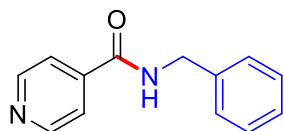

The title compound was prepared according to the general working procedure and purified by column chromatography (petroleum ether / ethyl acetate = 1:1) to give the product as a white solid in 80% yield (51.0 mg); <sup>1</sup>H NMR (DMSO-*d*<sub>6</sub>, 400 MHz, ppm): δ = 9.38 – 9.35 (m, 1H), 8.74 (d, *J* = 8.0 Hz, 2H), 7.82 – 7.80 (m, 2H), 7.34 – 7.33 (m, 4H), 7.28 – 7.23 (m, 1H), 4.51 (d, *J* = 8.0 Hz, 2H); <sup>13</sup>C NMR (CDCl<sub>3</sub>, 100 MHz, ppm): δ = 165.5, 150.3, 141.4, 137.5, 128.7, 127.8, 127.7, 121.0, 44.1.

### *N*-(4-methylbenzyl)isonicotinamide (**4**)<sup>2</sup>

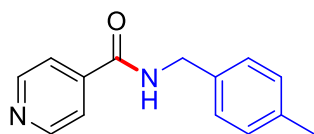

The title compound was prepared according to the general working procedure and purified by column chromatography (petroleum ether / ethyl acetate = 1:1) to give the product as a pale yellow solid in 75% yield (50.6 mg); <sup>1</sup>H NMR (DMSO-*d*<sub>6</sub>, 400 MHz, ppm): δ = 9.29 – 9.26 (m, 1H), 8.73 – 8.72 (m, 2H), 7.79 – 7.78 (m, 2H), 7.21 (d, *J* = 8.0 Hz, 2H), 7.14 – 7.13 (m, 2H), 4.45 – 4.44 (m, 2H), 2.27 (s, 3H); <sup>13</sup>C NMR (DMSO-*d*<sub>6</sub>, 100 MHz, ppm): δ = 164.7, 150.3, 141.4, 136.1, 136.0, 128.9, 127.4, 121.3, 42.5, 20.7.

### *N*-(3-methylbenzyl)isonicotinamide (**5**)

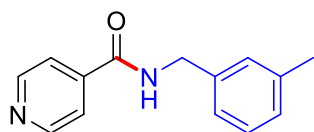

The title compound was prepared according to the general working procedure and purified by column chromatography (petroleum ether / ethyl acetate = 1:1) to give the product as a brown oil in 75% yield (51.2 mg);  $^1\text{H}$  NMR (DMSO- $d_6$ , 400 MHz, ppm):  $\delta$  = 9.32 – 9.28 (m, 1H), 8.74 – 8.73 (m, 2H), 7.80 (d,  $J$  = 8.0 Hz, 2H), 7.23 – 7.20 (m, 1H), 7.14 – 7.10 (m, 2H), 7.06 (d,  $J$  = 8.0 Hz, 1H), 4.47 – 4.46 (m, 2H), 2.29 (s, 3H);  $^{13}\text{C}$  NMR (DMSO- $d_6$ , 100 MHz, ppm):  $\delta$  = 164.7, 150.3, 141.3, 139.1, 137.5, 128.3, 128.0, 127.6, 124.5, 121.3, 42.8, 21.1. HRMS (ESI-TOF)  $m/z$ :  $[\text{M} + \text{H}]^+$  Calcd for  $\text{C}_{14}\text{H}_{15}\text{N}_2\text{O}$  227.1184; Found: 227.1187.

*N*-(2-methylbenzyl)isonicotinamide (**6**)

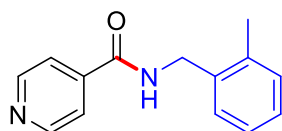

The title compound was prepared according to the general working procedure and purified by column chromatography (petroleum ether / ethyl acetate = 1:1) to give the product as a brown oil in 81% yield (55.0 mg);  $^1\text{H}$  NMR (DMSO- $d_6$ , 400 MHz, ppm):  $\delta$  = 9.23 – 9.20 (m, 1H), 8.75 – 8.73 (m, 2H), 7.83 – 7.81 (m, 2H), 7.28 – 7.25 (m, 1H), 7.18 – 7.14 (m, 3H), 4.49 (d,  $J$  = 8.0 Hz, 2H), 2.33 (s, 3H);  $^{13}\text{C}$  NMR (DMSO- $d_6$ , 100 MHz, ppm):  $\delta$  = 164.8, 150.3, 141.4, 136.7, 135.7, 130.1, 127.6, 127.0, 125.9, 121.4, 41.0, 18.8. HRMS (ESI-TOF)  $m/z$ :  $[\text{M} + \text{H}]^+$  Calcd for  $\text{C}_{14}\text{H}_{15}\text{N}_2\text{O}$  227.1184; Found: 227.1182.

*N*-(4-methoxybenzyl)isonicotinamide (**7**)

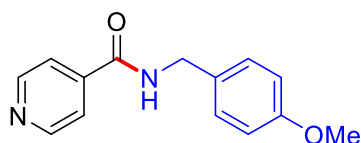

The title compound was prepared according to the general working procedure and purified by column chromatography (petroleum ether / ethyl acetate = 1:1) to give the product as a pale yellow solid in 68% yield (49.5 mg);  $^1\text{H}$  NMR (DMSO- $d_6$ , 400 MHz, ppm):  $\delta$  = 9.30 – 9.27 (m, 1H), 8.73 – 8.71 (m, 2H), 7.79 – 7.77 (m, 2H), 7.26 – 7.24 (m, 2H), 6.90 – 6.88 (m, 2H), 4.42 (d,  $J$  = 8.0 Hz, 2H), 3.72 (s, 3H);  $^{13}\text{C}$  NMR (DMSO- $d_6$ , 100 MHz, ppm):  $\delta$  = 164.7, 158.4, 150.4, 141.4, 131.2,

128.8, 121.4, 113.9, 55.2, 42.3. HRMS (ESI-TOF)  $m/z$ :  $[M + H]^+$  Calcd for  $C_{14}H_{15}N_2O_2$  243.1134; Found: 243.1141.

*N*-(3-methoxybenzyl)isonicotinamide (**8**)

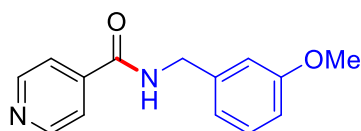

The title compound was prepared according to the general working procedure and purified by column chromatography (petroleum ether / ethyl acetate = 1:1) to give the product as a brown oil in 74% yield (54.1 mg);  $^1H$  NMR (DMSO- $d_6$ , 400 MHz, ppm):  $\delta$  = 9.35 – 9.32 (m, 1H), 8.74 – 8.73 (m, 2H), 7.81 – 7.79 (m, 2H), 7.25 (t,  $J$  = 8.0 Hz, 1H), 6.91 – 6.89 (m, 2H), 6.84 – 6.81 (m, 1H), 4.98 (d,  $J$  = 8.0 Hz, 2H), 3.73 (s, 3H);  $^{13}C$  NMR (DMSO- $d_6$ , 100 MHz, ppm):  $\delta$  = 164.9, 159.5, 150.4, 141.4, 140.8, 129.6, 121.4, 119.6, 113.1, 112.4, 55.1, 42.8. HRMS (ESI-TOF)  $m/z$ :  $[M + H]^+$  Calcd for  $C_{14}H_{15}N_2O_2$  243.1134; Found: 243.1139.

*N*-(2-methoxybenzyl)isonicotinamide (**9**)

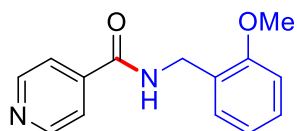

The title compound was prepared according to the general working procedure and purified by column chromatography (petroleum ether / ethyl acetate = 1:1) to give the product as a pale yellow solid in 69% yield (50.0 mg);  $^1H$  NMR (DMSO- $d_6$ , 400 MHz, ppm):  $\delta$  = 9.19 – 9.16 (m, 1H), 8.74 – 8.73 (m, 2H), 7.82 – 7.81 (m, 2H), 7.25 (t,  $J$  = 8.0 Hz, 1H), 7.20 (d,  $J$  = 8.0 Hz, 1H), 7.00 (d,  $J$  = 8.0 Hz, 1H), 6.91 (t,  $J$  = 8.0 Hz, 1H), 4.48 – 4.47 (m, 2H), 3.82 (s, 3H);  $^{13}C$  NMR (DMSO- $d_6$ , 100 MHz, ppm):  $\delta$  = 165.0, 156.7, 150.4, 141.4, 128.3, 127.6, 126.4, 121.5, 120.3, 110.6, 55.5, 37.9. HRMS (ESI-TOF)  $m/z$ :  $[M + H]^+$  Calcd for  $C_{14}H_{15}N_2O_2$  243.1134; Found: 243.1135.

*N*-(4-fluorobenzyl)isonicotinamide (**10**)

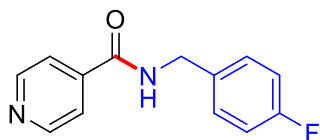

The title compound was prepared according to the general working procedure and purified by column chromatography (petroleum ether / ethyl acetate = 1:1) to give the product as a pale yellow solid in 74% yield (50.9 mg);  $^1\text{H}$  NMR (DMSO- $d_6$ , 400 MHz, ppm):  $\delta$  = 9.34 – 9.31 (m, 1H), 8.74 – 8.72 (m, 2H), 7.79 – 7.78 (m, 2H), 7.38 – 7.35 (m, 2H), 7.19 – 7.13 (m, 2H), 4.48 – 4.47 (m, 2H);  $^{13}\text{C}$  NMR (CDCl $_3$ , 100 MHz, ppm):  $\delta$  = 164.8, 161.3 (d, J = 241.0 Hz), 150.3, 141.2, 135.4 (d, J = 3.0 Hz), 129.4 (d, J = 8.0 Hz), 121.3, 115.1 (d, J = 21.0 Hz), 42.1. HRMS (ESI-TOF) m/z: [M + H] $^+$  Calcd for C $_{13}$ H $_{12}$ N $_2$ OF 231.0934; Found: 231.0939.

*N*-(4-chlorobenzyl)isonicotinamide (**11**)

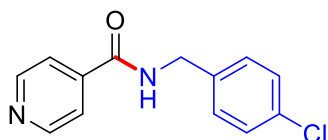

The title compound was prepared according to the general working procedure and purified by column chromatography (petroleum ether / ethyl acetate = 1:1) to give the product as a pale yellow solid in 77% yield (56.9 mg);  $^1\text{H}$  NMR (DMSO- $d_6$ , 400 MHz, ppm):  $\delta$  = 9.37 – 9.34 (m, 1H), 8.74 – 8.73 (m, 2H), 7.79 – 7.78 (m, 2H), 7.41 – 7.34 (m, 4H), 4.48 (d, J = 8.0 Hz, 2H);  $^{13}\text{C}$  NMR (CDCl $_3$ , 100 MHz, ppm):  $\delta$  = 164.8, 150.4, 141.2, 138.2, 131.5, 129.2, 128.4, 121.3, 42.2. HRMS (ESI-TOF) m/z: [M + H] $^+$  Calcd for C $_{13}$ H $_{12}$ N $_2$ OCl 247.0638; Found: 247.0643.

*N*-(3-chlorobenzyl)isonicotinamide (**12**)

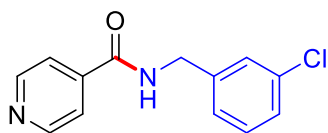

The title compound was prepared according to the general working procedure and purified by column chromatography (petroleum ether / ethyl acetate = 1:1) to give the product as a pale yellow solid in 69% yield (51.0 mg);  $^1\text{H}$  NMR (DMSO- $d_6$ , 400 MHz, ppm):  $\delta$  = 9.40 – 9.37 (m, 1H),

8.75 – 8.73 (m, 2H), 7.80 (dd, J = 8.0 Hz, J = 4.0 Hz, 2H), 7.39 – 7.38 (m, 1H), 7.36 (d, J = 8.0 Hz, 1H), 7.33 – 7.28 (m, 2H), 4.50 (d, J = 8.0 Hz, 2H); <sup>13</sup>C NMR (CDCl<sub>3</sub>, 100 MHz, ppm): δ = 165.6, 150.4, 141.2, 139.6, 134.6, 130.1, 127.9, 127.8, 125.9, 121.0, 43.5. HRMS (ESI-TOF) m/z: [M + H]<sup>+</sup> Calcd for C<sub>13</sub>H<sub>12</sub>N<sub>2</sub>OCl 247.0638; Found: 247.0640.

*N*-(2-chlorobenzyl)isonicotinamide (**13**)

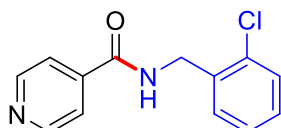

The title compound was prepared according to the general working procedure and purified by column chromatography (petroleum ether / ethyl acetate = 1:1) to give the product as a pale yellow solid in 71% yield (52.7 mg); <sup>1</sup>H NMR (DMSO-*d*<sub>6</sub>, 400 MHz, ppm): δ = 9.37 – 9.34 (m, 1H), 8.76 – 8.75 (m, 2H), 7.84 – 7.82 (m, 2H), 7.47 – 7.45 (m, 1H), 7.41 – 7.38 (m, 2H), 7.35 – 7.28 (m, 2H), 4.58 (d, J = 8.0 Hz, 2H); <sup>13</sup>C NMR (CDCl<sub>3</sub>, 100 MHz, ppm): δ = 165.1, 150.4, 141.1, 135.9, 132.2, 129.3, 128.9, 128.8, 127.3, 121.4, 40.8. HRMS (ESI-TOF) m/z: [M + H]<sup>+</sup> Calcd for C<sub>13</sub>H<sub>12</sub>N<sub>2</sub>OCl 247.0638; Found: 247.0642.

*N*-(4-bromobenzyl)isonicotinamide (**14**)

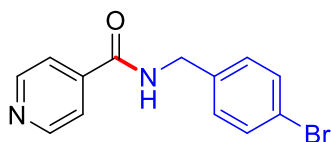

The title compound was prepared according to the general working procedure and purified by column chromatography (petroleum ether / ethyl acetate = 1:1) to give the product as a pale yellow solid in 62% yield (53.7 mg); <sup>1</sup>H NMR (DMSO-*d*<sub>6</sub>, 400 MHz, ppm): δ = 9.39 – 9.36 (m, 1H), 8.74 – 8.73 (m, 2H), 7.79 (dd, J = 8.0 Hz, J = 4.0 Hz, 2H), 7.53 (d, J = 8.0 Hz, 2H), 7.29 (d, J = 8.0 Hz, 2H), 4.47 (d, J = 4.0 Hz, 2H); <sup>13</sup>C NMR (CDCl<sub>3</sub>, 100 MHz, ppm): δ = 164.8, 150.4, 141.2, 138.7, 131.3, 129.7, 121.4, 120.0, 42.2. HRMS (ESI-TOF) m/z: [M + H]<sup>+</sup> Calcd for C<sub>13</sub>H<sub>12</sub>N<sub>2</sub>OBr 291.0133; Found: 291.0138.

*N*-(4-(trifluoromethyl)benzyl)isonicotinamide (**15**)<sup>4b</sup>



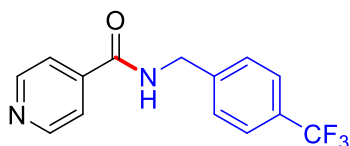

The title compound was prepared according to the general working procedure and purified by column chromatography (petroleum ether / ethyl acetate = 1:1) to give the product as a pale yellow solid in 70% yield (59.0 mg);  $^1\text{H}$  NMR (DMSO- $d_6$ , 400 MHz, ppm):  $\delta$  = 9.47 – 9.44 (m, 1H), 8.76 – 8.74 (m, 2H), 7.81 – 7.80 (m, 2H), 7.70 (d,  $J$  = 8.0 Hz, 2H), 7.55 (d,  $J$  = 8.0 Hz, 2H), 4.59 – 4.58 (m, 2H);  $^{13}\text{C}$  NMR ( $\text{CDCl}_3$ , 100 MHz, ppm):  $\delta$  = 165.0, 150.5, 144.1, 141.1, 128.1, 127.7 (q,  $J$  = 31.0 Hz), 124.5 (q,  $J$  = 270.0 Hz), 125.4 (q,  $J$  = 4.0 Hz), 121.4, 42.5. HRMS (ESI-TOF)  $m/z$ :  $[\text{M} + \text{H}]^+$  Calcd for  $\text{C}_{14}\text{H}_{12}\text{N}_2\text{OF}_3$  281.0902; Found: 281.0901.

*N*-(furan-2-ylmethyl)isonicotinamide (**16**)<sup>3</sup>

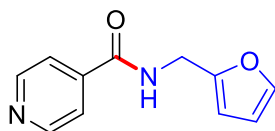

The title compound was prepared according to the general working procedure and purified by column chromatography (petroleum ether / ethyl acetate = 1:1) to give the product as a pale yellow solid in 57% yield (34.6 mg);  $^1\text{H}$  NMR ( $\text{CDCl}_3$ , 400 MHz, ppm):  $\delta$  = 8.68 – 8.67 (m, 2H), 7.63 – 7.61 (m, 2H), 7.36 – 7.35 (m, 1H), 7.03 (br, 1H), 6.34 – 6.28 (m, 2H), 4.62 (d,  $J$  = 8.0 Hz, 2H);  $^{13}\text{C}$  NMR ( $\text{CDCl}_3$ , 100 MHz, ppm):  $\delta$  = 165.3, 150.5, 150.4, 142.4, 141.3, 121.0, 110.5, 108.0, 37.0.

*N*-(thiophen-2-ylmethyl)isonicotinamide (**17**)<sup>4</sup>

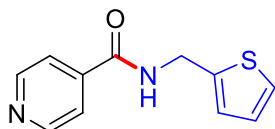

The title compound was prepared according to the general working procedure and purified by column chromatography (petroleum ether / ethyl acetate = 1:1) to give the product as a pale yellow solid in 59% yield (38.3 mg);  $^1\text{H}$  NMR ( $\text{CDCl}_3$ , 400 MHz, ppm):  $\delta$  = 8.65 (dd,  $J$  = 8.0 Hz,  $J$  = 4.0 Hz, 2H), 7.61 (dd,  $J$  = 8.0 Hz,  $J$  = 4.0 Hz, 2H), 7.24 – 7.23 (m, 1H), 7.18 (br, 1H), 7.01 (d,  $J$  = 8.0

Hz, 1H), 6.95 (dd, J = 8.0 Hz, J = 4.0 Hz, 1H), 4.78 (d, J = 8.0 Hz, 2H);  $^{13}\text{C}$  NMR ( $\text{CDCl}_3$ , 100 MHz, ppm):  $\delta$  = 165.3, 150.4, 141.3, 140.0, 127.0, 126.5, 125.5, 121.0, 38.8.

*N*-phenylisonicotinamide (**18**)<sup>1</sup>

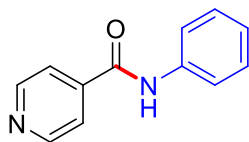

The title compound was prepared according to the general working procedure and purified by column chromatography (petroleum ether / ethyl acetate = 1:1) to give the product as light brown solid in 47% yield (28.0 mg);  $^1\text{H}$  NMR ( $\text{DMSO-}d_6$ , 400 MHz, ppm):  $\delta$  = 10.51 (br, 1H), 8.79 (d, J = 8.0 Hz, 2H), 7.87 – 7.85 (m, 2H), 7.78 (d, J = 8.0 Hz, 2H), 7.38 (t, J = 8.0 Hz, 2H), 7.14 (t, J = 8.0 Hz, 1H);  $^{13}\text{C}$  NMR ( $\text{DMSO-}d_6$ , 100 MHz, ppm):  $\delta$  = 164.1, 150.4, 142.1, 138.7, 128.9, 124.3, 121.7, 120.6.

*N*-(*p*-tolyl)isonicotinamide (**19**)<sup>5</sup>

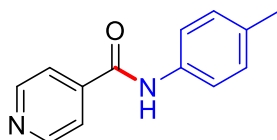

The title compound was prepared according to the general working procedure and purified by column chromatography (petroleum ether / ethyl acetate = 1:1) to give the product as light brown solid in 55% yield (35.1 mg);  $^1\text{H}$  NMR ( $\text{DMSO-}d_6$ , 400 MHz, ppm):  $\delta$  = 10.44 (br, 1H), 8.79 – 8.77 (m, 2H), 7.86 – 7.85 (m, 2H), 7.66 (d, J = 8.0 Hz, 2H), 7.17 (d, J = 8.0 Hz, 2H), 2.28 (s, 3H);  $^{13}\text{C}$  NMR ( $\text{DMSO-}d_6$ , 100 MHz, ppm):  $\delta$  = 163.9, 150.4, 142.1, 136.2, 133.4, 129.2, 121.7, 120.6, 20.6.

*N*-(4-methoxyphenyl)isonicotinamide (**20**)<sup>5</sup>

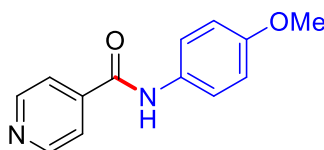

The title compound was prepared according to the general working procedure and purified by column chromatography (petroleum ether / ethyl acetate = 1:1) to give the product as light brown solid in 63% yield (43.0 mg);  $^1\text{H}$  NMR (DMSO- $d_6$ , 400 MHz, ppm):  $\delta$  = 10.40 (br, 1H), 8.78 – 8.77 (m, 2H), 7.86 – 7.85 (m, 2H), 7.70 – 7.66 (m, 2H), 6.97 – 6.93 (m, 2H), 3.75 (s, 3H);  $^{13}\text{C}$  NMR (DMSO- $d_6$ , 100 MHz, ppm):  $\delta$  = 163.6, 156.0, 150.4, 142.1, 131.7, 122.2, 121.7, 114.0, 55.3.

*N*-(4-fluorophenyl)isonicotinamide (**21**)<sup>5</sup>

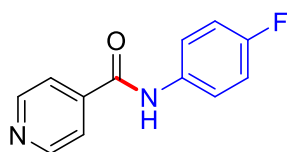

The title compound was prepared according to the general working procedure and purified by column chromatography (petroleum ether / ethyl acetate = 1:1) to give the product as light brown solid in 51% yield (33.0 mg);  $^1\text{H}$  NMR (DMSO- $d_6$ , 400 MHz, ppm):  $\delta$  = 10.57 (br, 1H), 8.79 (dd,  $J$  = 8.0 Hz,  $J$  = 4.0 Hz, 2H), 7.86 (dd,  $J$  = 8.0 Hz,  $J$  = 4.0 Hz, 2H), 7.82 – 7.77 (m, 2H), 7.25 – 7.19 (m, 2H);  $^{13}\text{C}$  NMR (DMSO- $d_6$ , 100 MHz, ppm):  $\delta$  = 164.0, 158.7 (d,  $J$  = 239.0 Hz), 150.4, 142.0, 135.1 (d,  $J$  = 3.0 Hz), 122.5 (d,  $J$  = 8.0 Hz), 121.7, 115.5 (d,  $J$  = 22.0 Hz).

*N*-(4-chlorophenyl)isonicotinamide (**22**)<sup>5</sup>

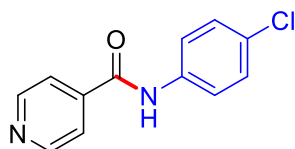

The title compound was prepared according to the general working procedure and purified by column chromatography (petroleum ether / ethyl acetate = 1:1) to give the product as light brown solid in 25% yield (17.1 mg);  $^1\text{H}$  NMR (DMSO- $d_6$ , 400 MHz, ppm):  $\delta$  = 10.62 (br, 1H), 8.80 – 8.78 (m, 2H), 7.86 – 7.85 (m, 2H), 7.82 – 7.80 (m, 2H), 7.45 – 7.42 (m, 2H);  $^{13}\text{C}$  NMR (DMSO- $d_6$ , 100 MHz, ppm):  $\delta$  = 164.2, 150.4, 141.8, 137.7, 128.7, 127.9, 122.1, 121.7.

*N*-(4-bromophenyl)isonicotinamide (**23**)<sup>6</sup>

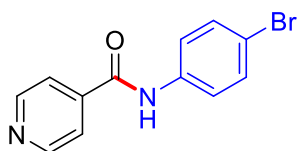

The title compound was prepared according to the general working procedure and purified by column chromatography (petroleum ether / ethyl acetate = 1:1) to give the product as light brown solid in 46% yield (37.8 mg);  $^1\text{H}$  NMR (DMSO- $d_6$ , 400 MHz, ppm):  $\delta$  = 10.62 (br, 1H), 8.80 – 8.78 (m, 2H), 7.86 – 7.84 (m, 2H), 7.78 – 7.74 (m, 2H), 7.58 – 7.54 (m, 2H);  $^{13}\text{C}$  NMR (DMSO- $d_6$ , 100 MHz, ppm):  $\delta$  = 164.2, 150.4, 141.8, 138.1, 131.7, 122.4, 121.7, 116.1.

*N*-(4-(trifluoromethyl)phenyl)isonicotinamide (**24**)<sup>7</sup>

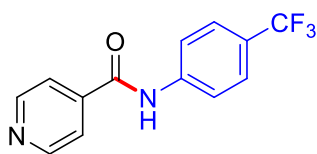

The title compound was prepared according to the general working procedure and purified by column chromatography (petroleum ether / ethyl acetate = 1:1) to give the product as a yellow solid in 25% yield (20.2 mg);  $^1\text{H}$  NMR (DMSO- $d_6$ , 400 MHz, ppm):  $\delta$  = 10.83 (br, 1H), 8.81 (d,  $J$  = 8.0 Hz, 2H), 8.01 (d,  $J$  = 8.0 Hz, 2H), 7.89 – 7.87 (m, 2H), 7.75 (d,  $J$  = 8.0 Hz, 2H);  $^{13}\text{C}$  NMR (DMSO- $d_6$ , 100 MHz, ppm):  $\delta$  = 164.7, 150.4, 142.4, 141.7, 126.1 (q,  $J$  = 4.0 Hz), 124.4 (q,  $J$  = 270.0 Hz), 124.3 (q,  $J$  = 32.0 Hz), 121.8, 120.4.

*N*-butylisonicotinamide (**25**)<sup>5</sup>

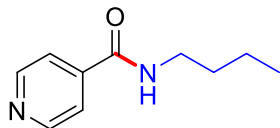

The title compound was prepared according to the general working procedure and purified by column chromatography (ethyl acetate) to give the product as a brown oil in 80% yield (42.9 mg);  $^1\text{H}$  NMR (DMSO- $d_6$ , 400 MHz, ppm):  $\delta$  = 8.72 – 8.70 (m, 3H), 7.74 – 7.73 (m, 2H), 3.29 – 3.24 (m, 2H), 1.54 – 1.47 (m, 2H), 1.36 – 1.27 (m, 2H), 0.90 – 0.87 (m, 3H);  $^{13}\text{C}$  NMR (DMSO- $d_6$ , 100 MHz, ppm):  $\delta$  = 164.6, 150.3, 141.7, 121.3, 39.1, 31.1, 19.7, 13.8.

*N*-hexylisonicotinamide (**26**)<sup>5</sup>

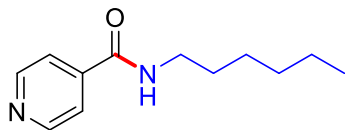

The title compound was prepared according to the general working procedure and purified by column chromatography (ethyl acetate) to give the product as a brown oil in 77% yield (47.6 mg); <sup>1</sup>H NMR (DMSO-*d*<sub>6</sub>, 400 MHz, ppm): δ = 8.74 – 8.70 (m, 3H), 7.74 – 7.73 (m, 2H), 3.28 – 3.23 (m, 2H), 1.55 – 1.48 (m, 2H), 1.31 – 1.23 (m, 6H), 0.86 – 0.83 (m, 3H); <sup>13</sup>C NMR (DMSO-*d*<sub>6</sub>, 100 MHz, ppm): δ = 164.6, 150.2, 141.7, 121.3, 39.4, 31.1, 29.0, 26.2, 22.1, 14.0.

*N*-cyclohexylisonicotinamide (**27**)<sup>5</sup>

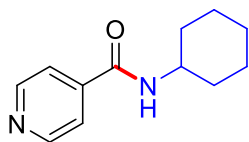

The title compound was prepared according to the general working procedure and purified by column chromatography (ethyl acetate) to give the product as a white solid in 63% yield (38.6 mg); <sup>1</sup>H NMR (DMSO-*d*<sub>6</sub>, 400 MHz, ppm): δ = 8.70 – 8.69 (m, 2H), 8.51 (d, *J* = 8.0 Hz, 1H), 7.74 – 7.73 (m, 2H), 3.77 – 3.74 (m, 1H), 1.84 – 1.80 (m, 2H), 1.74 – 1.68 (m, 2H), 1.62 – 1.57 (m, 1H), 1.35 – 1.21 (m, 5H); <sup>13</sup>C NMR (DMSO-*d*<sub>6</sub>, 100 MHz, ppm): δ = 163.9, 150.2, 141.9, 121.5, 48.7, 32.4, 25.3, 25.0.

*N*-(1-phenylethyl)isonicotinamide (**28**)<sup>8</sup>

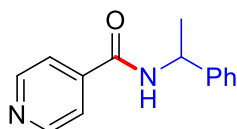

The title compound was prepared according to the general working procedure and purified by column chromatography (ethyl acetate) to give the product as a brown oil in 68% yield (45.8 mg); <sup>1</sup>H NMR (DMSO-*d*<sub>6</sub>, 400 MHz, ppm): δ = 9.12 (d, *J* = 8.0 Hz, 1H), 8.73 – 8.72 (m, 2H), 7.80 – 7.79

(m, 2H), 7.41 – 7.38 (m, 2H), 7.35 – 7.31 (m, 3H), 7.25 – 7.21 (m, 1H), 5.21 – 5.13 (m, 1H), 1.49 (d,  $J = 4.0$  Hz, 1H);  $^{13}\text{C}$  NMR (DMSO- $d_6$ , 100 MHz, ppm):  $\delta = 164.1, 150.3, 144.5, 141.6, 128.4, 126.9, 126.2, 121.5, 48.8, 22.2$ .

*N*-(*tert*-butyl)isonicotinamide (**29**)<sup>1</sup>

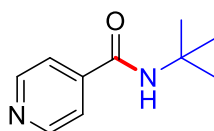

The title compound was prepared according to the general working procedure and purified by column chromatography (ethyl acetate) to give the product as a brown oil in 33% yield (18.0 mg);  $^1\text{H}$  NMR ( $\text{CDCl}_3$ , 400 MHz, ppm):  $\delta = 8.70$  (dd,  $J = 8.0$  Hz,  $J = 4.0$  Hz, 2H), 7.56 (dd,  $J = 8.0$  Hz,  $J = 4.0$  Hz, 2H), 6.07 (br, 1H), 1.47 (s, 9H);  $^{13}\text{C}$  NMR ( $\text{CDCl}_3$ , 100 MHz, ppm):  $\delta = 164.8, 150.4, 142.8, 120.7, 52.1, 28.7$ .

*N,N*-diethylisonicotinamide (**30**)<sup>9</sup>

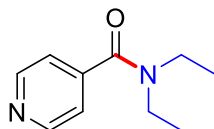

The title compound was prepared according to the general working procedure and purified by column chromatography (petroleum ether / ethyl acetate = 1:1) to give the product as a yellow oil in 45% yield (24.2 mg);  $^1\text{H}$  NMR ( $\text{CDCl}_3$ , 400 MHz, ppm):  $\delta = 8.65$  (d,  $J = 8.0$  Hz, 2H), 7.25 – 7.24 (m, 2H), 3.53 (q,  $J = 8.0$  Hz, 2H), 3.18 (q,  $J = 8.0$  Hz, 2H), 1.23 (t,  $J = 8.0$  Hz, 3H), 1.09 (t,  $J = 8.0$  Hz, 3H);  $^{13}\text{C}$  NMR ( $\text{CDCl}_3$ , 100 MHz, ppm):  $\delta = 168.5, 150.0, 144.7, 120.6, 43.1, 39.3, 14.1, 12.7$ .

*N,N*-dibutylisonicotinamide (**31**)<sup>5</sup>

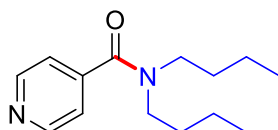

The title compound was prepared according to the general working procedure and purified by column chromatography (petroleum ether / ethyl acetate = 3:1) to give the product as a yellow oil in 46% yield (32.5 mg);  $^1\text{H}$  NMR ( $\text{CDCl}_3$ , 400 MHz, ppm):  $\delta$  = 8.65 – 8.64 (m, 2H), 7.23 – 7.22 (m, 2H), 3.46 (t,  $J$  = 8.0 Hz, 2H), 3.10 (t,  $J$  = 8.0 Hz, 2H), 1.65 – 1.58 (m, 2H), 1.49 – 1.42 (m, 2H), 1.40 – 1.33 (m, 2H), 1.16 – 1.07 (m, 2H), 0.95 (t,  $J$  = 8.0 Hz, 3H), 0.77 (t,  $J$  = 8.0 Hz, 3H);  $^{13}\text{C}$  NMR ( $\text{CDCl}_3$ , 100 MHz, ppm):  $\delta$  = 168.9, 150.0, 144.8, 120.8, 48.5, 44.4, 30.7, 29.5, 20.2, 19.6, 13.8, 13.5.

*Pyridin-4-yl(pyrrolidin-1-yl)methanone (32)*<sup>1</sup>

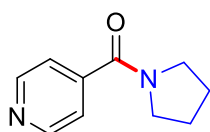

The title compound was prepared according to the general working procedure and purified by column chromatography (ethyl acetate) to give the product as a yellow oil in 83% yield (44.1 mg);  $^1\text{H}$  NMR ( $\text{DMSO-}d_6$ , 400 MHz, ppm):  $\delta$  = 8.67 – 8.65 (m, 2H), 7.47 – 7.46 (m, 2H), 3.46 (t,  $J$  = 8.0 Hz, 2H), 3.32 (t,  $J$  = 8.0 Hz, 2H), 1.88 – 1.78 (m, 4H);  $^{13}\text{C}$  NMR ( $\text{DMSO-}d_6$ , 100 MHz, ppm):  $\delta$  = 166.2, 150.1, 144.5, 121.4, 48.7, 46.0, 26.0, 24.0.

*Piperidin-1-yl(pyridin-4-yl)methanone (33)*<sup>1</sup>

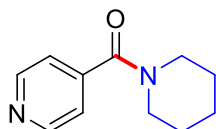

The title compound was prepared according to the general working procedure and purified by column chromatography (ethyl acetate) to give the product as a yellow oil in 56% yield (31.8 mg);  $^1\text{H}$  NMR ( $\text{CDCl}_3$ , 400 MHz, ppm):  $\delta$  = 8.65 – 8.64 (m, 2H), 7.25 – 7.24 (m, 2H), 3.69 – 3.67 (m, 2H), 3.26 – 3.23 (m, 2H), 1.66 (s, 4H), 1.52 – 1.46 (m, 2H);  $^{13}\text{C}$  NMR ( $\text{CDCl}_3$ , 100 MHz, ppm):  $\delta$  = 167.5, 150.0, 144.0, 121.0, 48.4, 42.9, 26.4, 25.4, 24.3.

*morpholino(pyridin-4-yl)methanone (34)*<sup>5</sup>

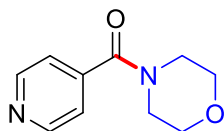

The title compound was prepared according to the general working procedure and purified by column chromatography (ethyl acetate) to give the product as a yellow oil in 58% yield (32.9 mg);  $^1\text{H}$  NMR (DMSO- $d_6$ , 400 MHz, ppm):  $\delta$  = 8.67 (d,  $J$  = 8.0 Hz, 2H), 7.41 – 7.40 (m, 2H), 3.66 – 3.61 (m, 4H), 3.56 – 3.52 (m, 2H), 3.27 – 3.25 (m, 2H);  $^{13}\text{C}$  NMR (DMSO- $d_6$ , 100 MHz, ppm):  $\delta$  = 167.0, 150.2, 143.3, 121.4, 66.1, 66.0, 47.5, 41.9.

*Isonicotinamide (35)*<sup>10</sup>

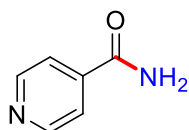

The title compound was prepared according to the general working procedure and purified by column chromatography (ethyl acetate) to give the product as a white solid in 36% yield (13.2 mg);  $^1\text{H}$  NMR (DMSO- $d_6$ , 400 MHz, ppm):  $\delta$  = 8.72 – 8.71 (m, 2H), 8.25 (br, 1H), 7.77 – 7.76 (m, 2H), 7.73 (br, 1H);  $^{13}\text{C}$  NMR (DMSO- $d_6$ , 100 MHz, ppm):  $\delta$  = 166.4, 150.3, 141.4, 121.5.

*N-benzylnicotinamide (36)*<sup>11</sup>

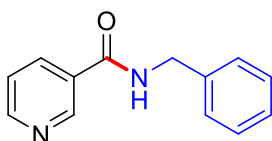

The title compound was prepared according to the general working procedure and purified by column chromatography (petroleum ether / ethyl acetate = 1:1) to give the product as a white solid in 22% yield (14.0 mg);  $^1\text{H}$  NMR (DMSO- $d_6$ , 400 MHz, ppm):  $\delta$  = 9.27 – 9.24 (m, 1H), 9.06 – 9.05 (m, 1H), 8.72 – 8.70 (m, 1H), 8.25 – 8.22 (m, 1H), 7.53 – 7.50 (m, 1H), 7.34 – 7.33 (m, 4H), 7.28 – 7.23 (m, 1H), 4.51 (d,  $J$  = 4.0 Hz, 2H);  $^{13}\text{C}$  NMR (DMSO- $d_6$ , 100 MHz, ppm):  $\delta$  = 164.9, 152.0, 148.5, 139.4, 135.1, 129.9, 128.5, 127.4, 127.0, 123.6, 42.7.



*N*-benzylpicolinamide (**37**)<sup>1</sup>

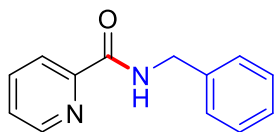

The title compound was prepared according to the general working procedure and purified by column chromatography (petroleum ether / ethyl acetate = 1:1) to give the product as a yellow oil in 63% yield (40.3 mg); <sup>1</sup>H NMR (DMSO-*d*<sub>6</sub>, 400 MHz, ppm): δ = 9.37 – 9.34 (m, 1H), 8.66 – 8.64 (m, 1H), 8.07 – 8.05 (m, 1H), 8.02 – 7.97 (m, 1H), 7.62 – 7.58 (m, 1H), 7.34 – 7.30 (m, 4H), 7.24 – 7.21 (m, 1H), 4.51 (d, J = 4.0 Hz, 2H); <sup>13</sup>C NMR (DMSO-*d*<sub>6</sub>, 100 MHz, ppm): δ = 164.1, 150.1, 148.6, 139.7, 137.9, 128.4, 127.5, 126.9, 126.7, 122.1, 42.5.

Picolinamide (**38**)<sup>1</sup>

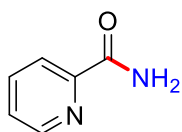

The title compound was prepared according to the general working procedure and purified by column chromatography (ethyl acetate) to give the product as a white solid in 69% yield (25.4 mg); <sup>1</sup>H NMR (DMSO-*d*<sub>6</sub>, 400 MHz, ppm): δ = 8.63 – 8.61 (m, 1H), 8.13 (br, 1H), 8.05 – 8.03 (m, 1H), 8.00 – 7.95 (m, 1H), 7.66 (br, 1H), 7.60 – 7.56 (m, 1H); <sup>13</sup>C NMR (DMSO-*d*<sub>6</sub>, 100 MHz, ppm): δ = 166.2, 150.4, 148.6, 137.8, 126.6, 122.0.

2,2,6,6-Tetramethylpiperidin-1-yl isonicotinate (**39**)<sup>1</sup>

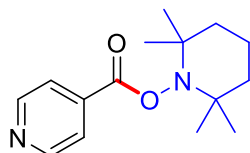

The title compound was prepared according to the general working procedure and purified by column chromatography (petroleum ether / ethyl acetate = 9:1) to give the product as a white oil in 50% yield (39.7 mg); <sup>1</sup>H NMR (CDCl<sub>3</sub>, 400 MHz, ppm): δ = 8.79 (dd, J = 8.0 Hz, J = 4.0 Hz, 2H),

7.87 – 7.86 (m, 2H), 1.80 – 1.69 (m, 3H), 1.61 – 1.57 (m, 2H), 1.48 – 1.44 (m, 1H), 1.26 (s, 6H), 1.10 (s, 6H); <sup>13</sup>C NMR (CDCl<sub>3</sub>, 100 MHz, ppm): δ = 164.9, 150.6, 136.9, 122.8, 60.6, 39.0, 31.9, 20.8, 16.9.

## Reference

- (1) J. K. Laha, A. Gupta, U. Gulati, M. K. Hunjan, J. P. Weber, M. Breugst. *Org. Chem. Front*, 2022, **9**, 6902-6908.
- (2) L. Rubio-Perez, P. Sharma, F. J. Perez-Flores, L. Velasco, J. L. Arias, A. Cabrera. *Tetrahedron*, 2012, **68**, 2342-2348.
- (3) L. Tian, Q. W. Zhang, K. Albajan. *Synthesis*, 2022, **54**, 4353-4360.
- (4) U. B. Farrukh, A. Bilal, H. Zahid, M. Iqbal, S. Manzoor, F. Firdous, M. Furqan, M. Azeem, A-H. Emwas, M. Alazmi, X. Gao, R. S. Z. Saleem, A. Faisal. *ChemistrySelect*, 2022, **7**, e202104218;
- (5) C. L. Ma, Y. Tian, J. Y. Wang, X. He, Y. Q. Jiang, B. Yu. *Org. Lett.* 2022, **24**, 8265–8270.
- (6) T. T. T. Nguyen, V. D. Duong, T. N. N. Pham, Q. T. Duong, T. B. Nguyen. *Org. Biomol. Chem.*, 2022, **20**, 8054–8058.
- (7) Y-R. Li, C-C. Lin, C-Y. Huang, Y-H. Wong, C-H. Hsieh, H-W. Wu, J. J. W. Chen, Y-S. Wu. *Chemical Biology & Drug Design*, 2017, **90**, 1307-1311.
- (8) K. V. Katkar, P. S. Chaudhari, K. G. Akamanchi. *GreenChem.*, 2011, **13**, 835–838.
- (9) S-M. Wang, C. Zhao, X. Zhang, H-L. Qin. *Org. Biomol. Chem.*, 2019, **17**, 4087-4101.
- (10) J. J. Chen, Y. Z. Xia, S. Lee. *Org. Lett.* 2020, **22**, 3504–3508.
- (11) P. V. Ramachandran, H. J. Hamann. *Org. Lett.* 2021, **23**, 2938–2942.

# NMR Spectra of products

## 3-<sup>1</sup>H NMR

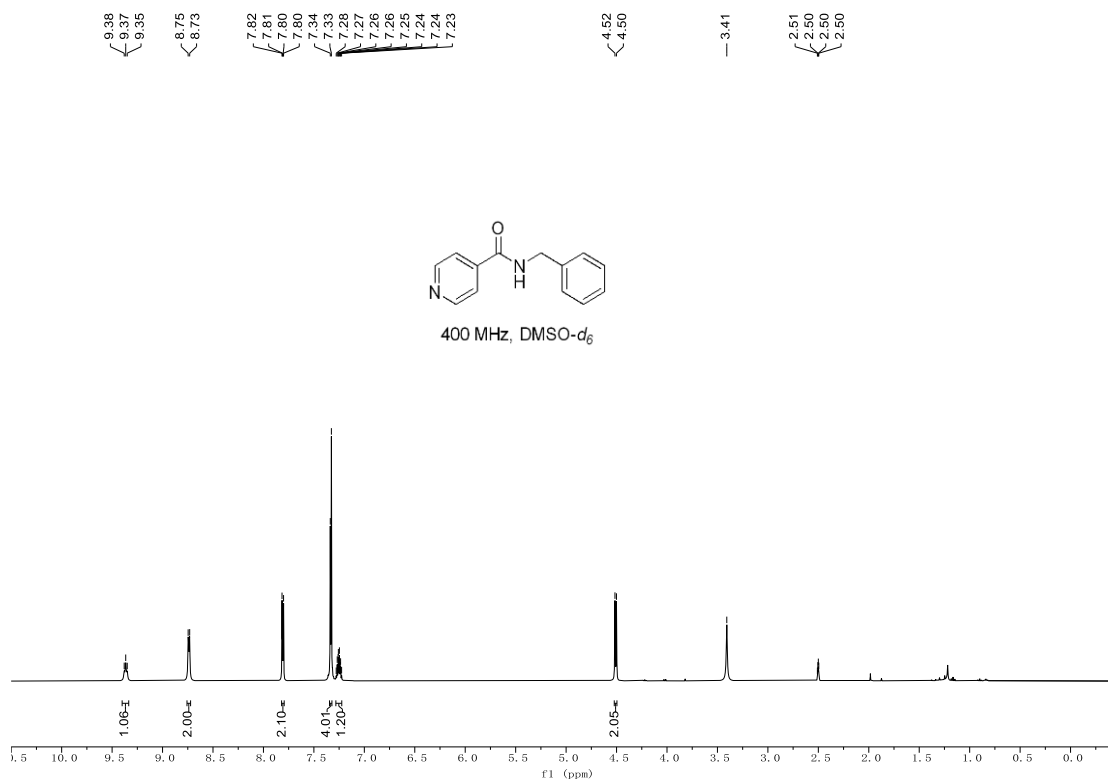

## 3-<sup>13</sup>C NMR

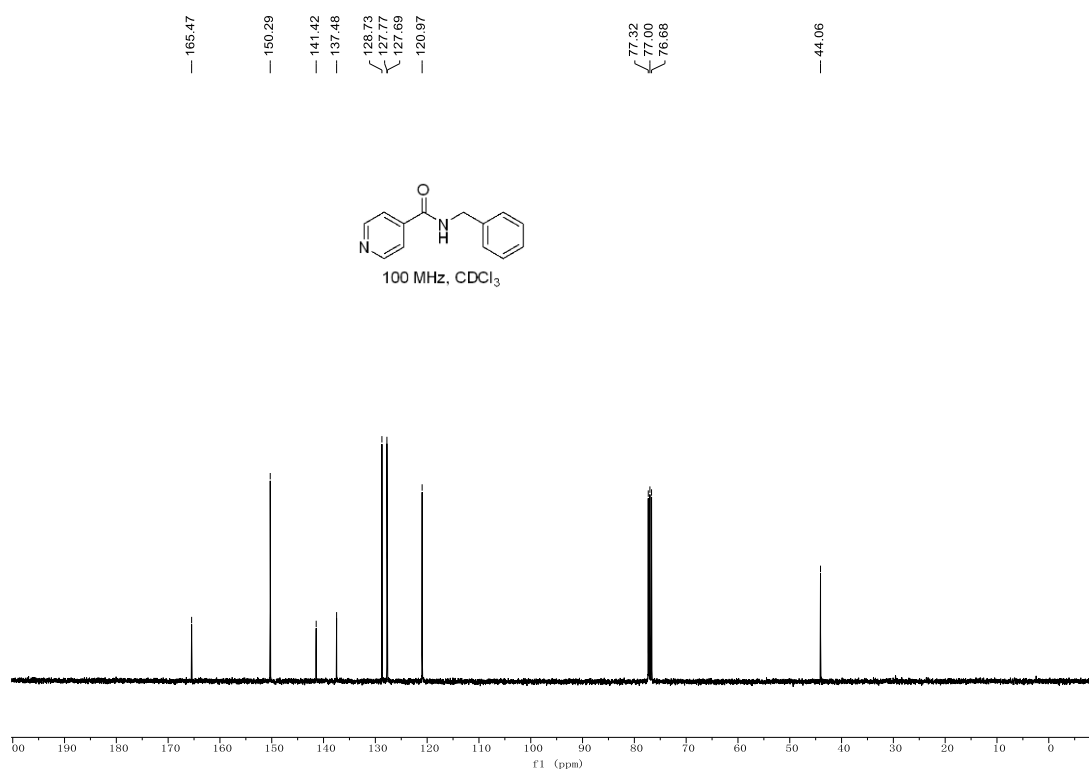

### 4-<sup>1</sup>H NMR

9.29  
9.28  
9.26

8.73  
8.72

7.79  
7.78

7.22  
7.20  
7.14  
7.13

4.45  
4.44

3.32

2.50  
2.27

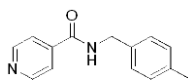

400 MHz, DMSO-*d*<sub>6</sub>

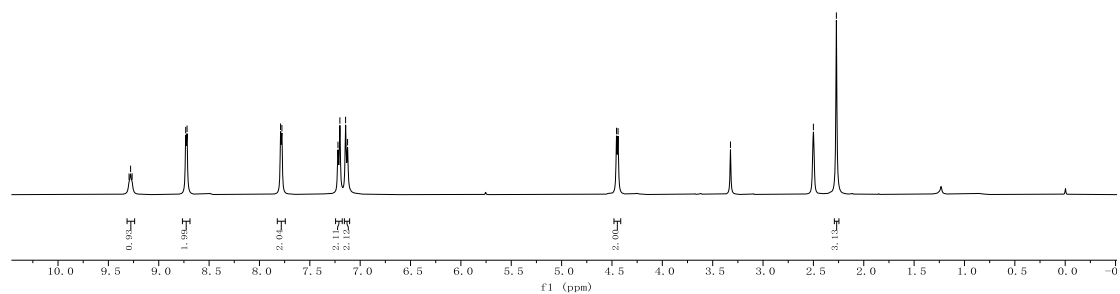

### 4-<sup>13</sup>C NMR

164.65

150.32

141.35

138.13  
138.02

128.94

127.36

121.31

42.53  
40.23  
40.02  
39.80  
39.39  
39.18  
38.97

20.73

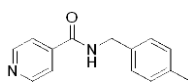

100 MHz, DMSO-*d*<sub>6</sub>

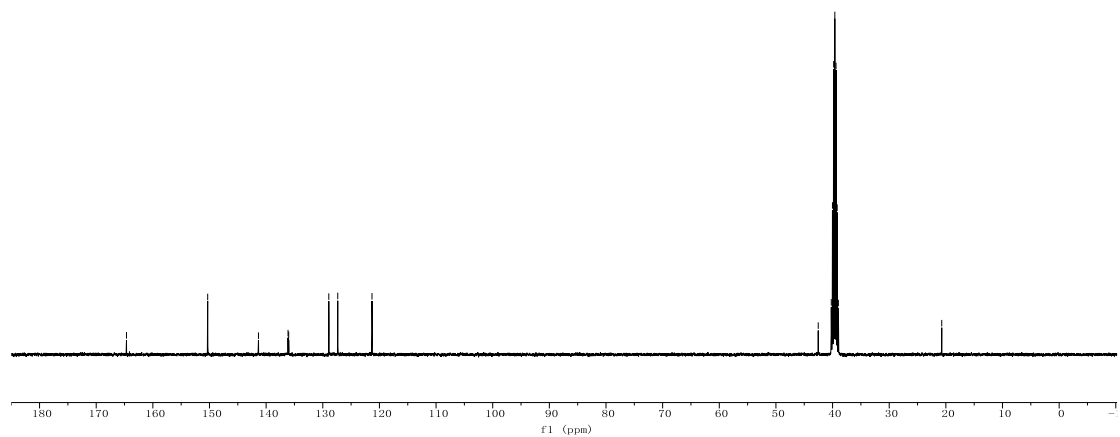

### 5-<sup>1</sup>H NMR

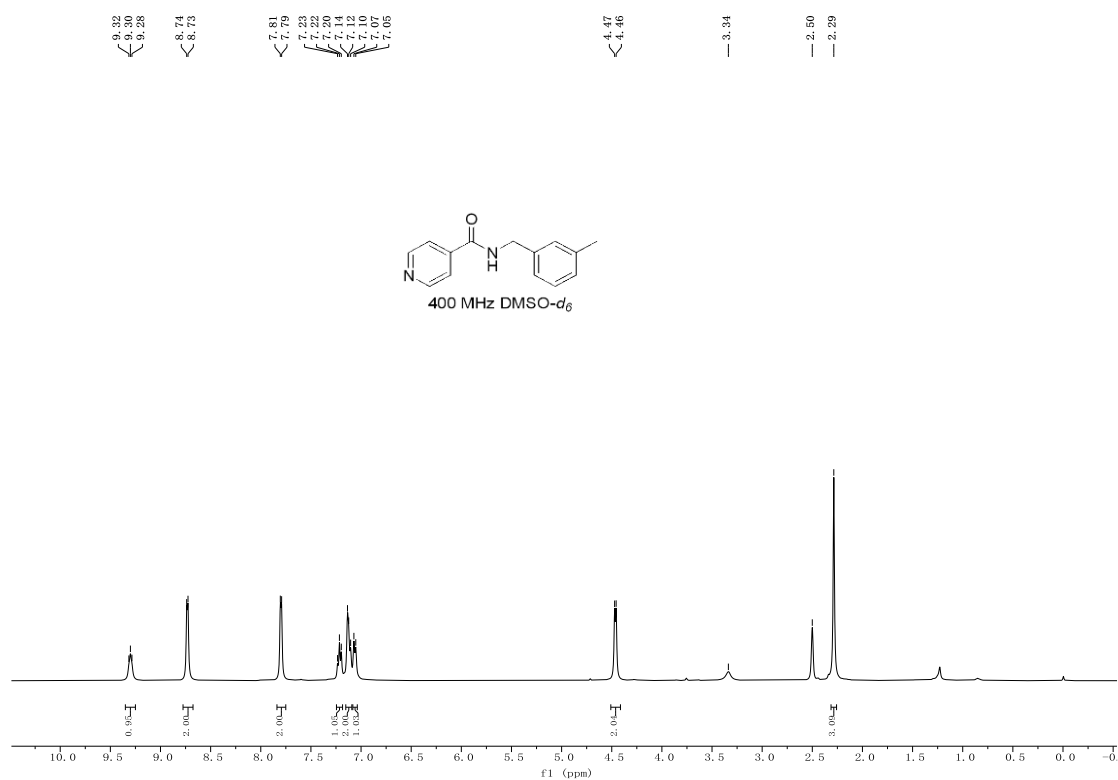

### 5-<sup>13</sup>C NMR

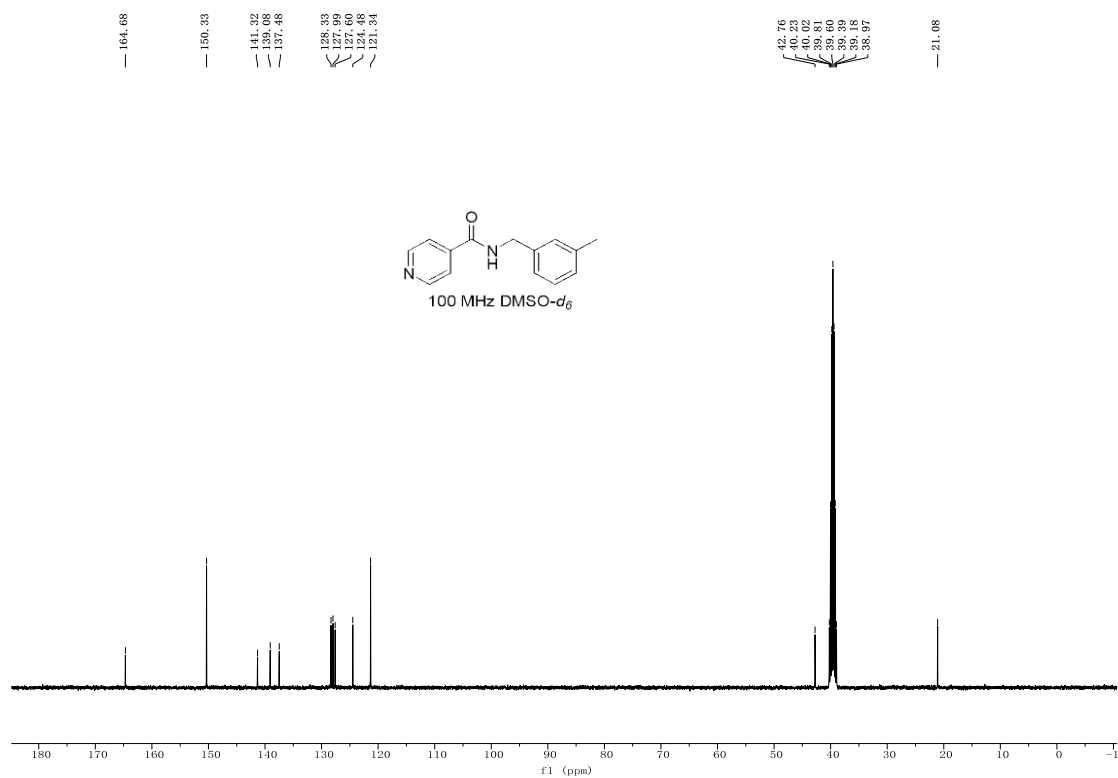



### 7-<sup>1</sup>H NMR

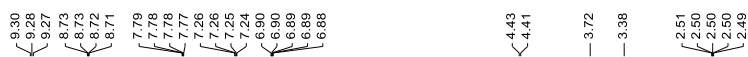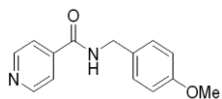

400 MHz, DMSO-*d*<sub>6</sub>

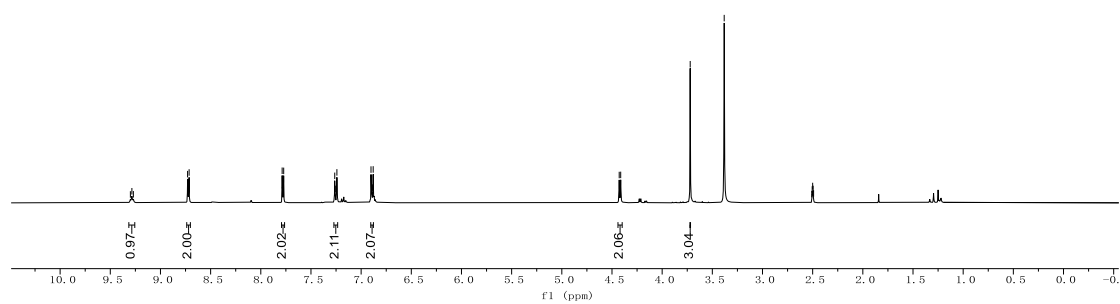

### 7-<sup>13</sup>C NMR

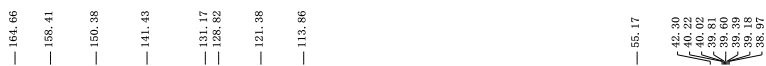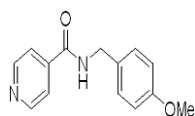

100 MHz, DMSO-*d*<sub>6</sub>

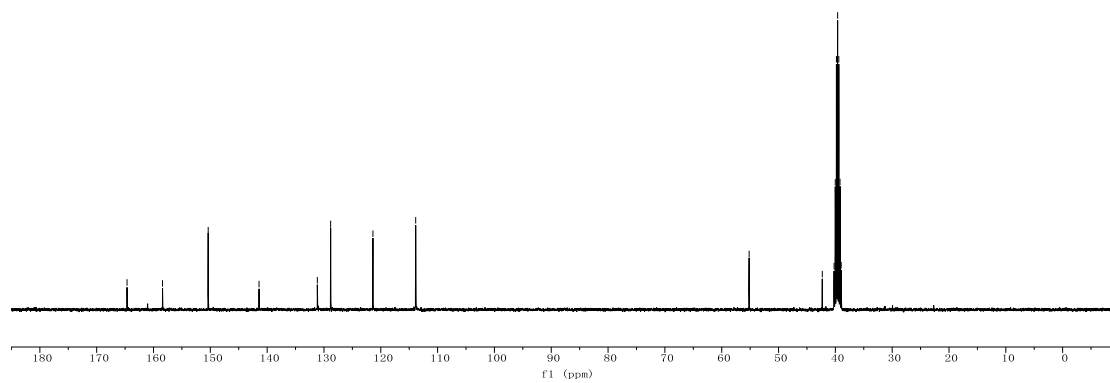

### 8-<sup>1</sup>H NMR

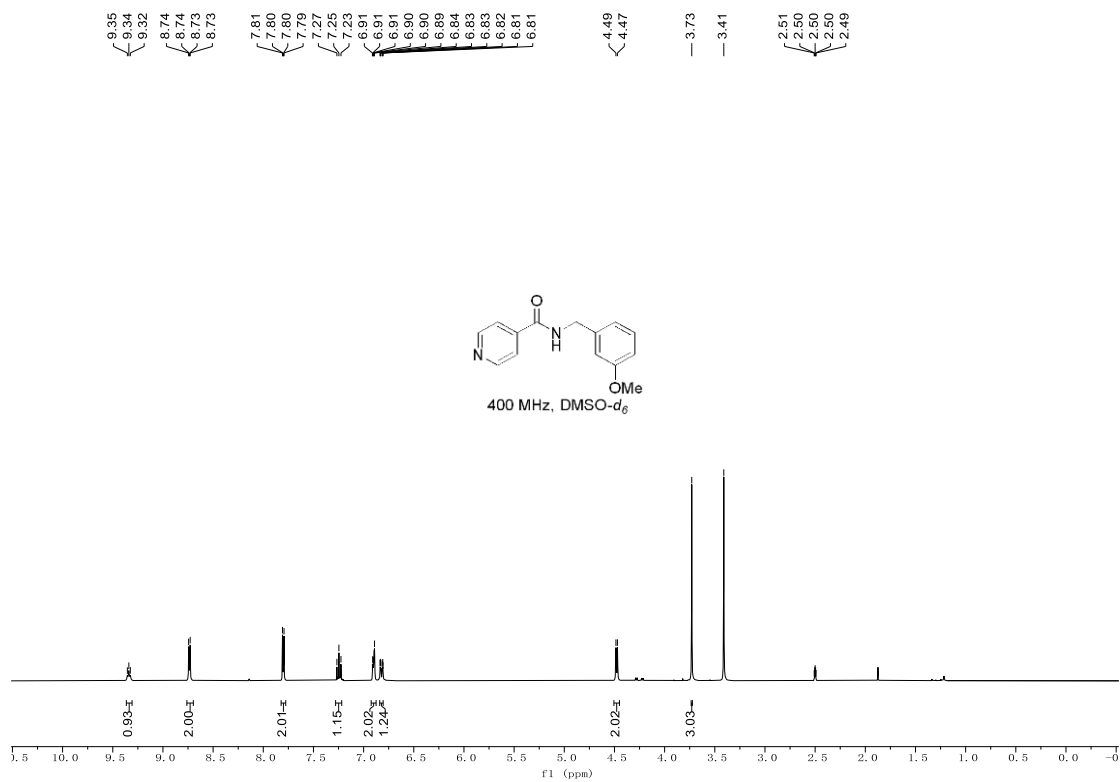

### 8-<sup>13</sup>C NMR

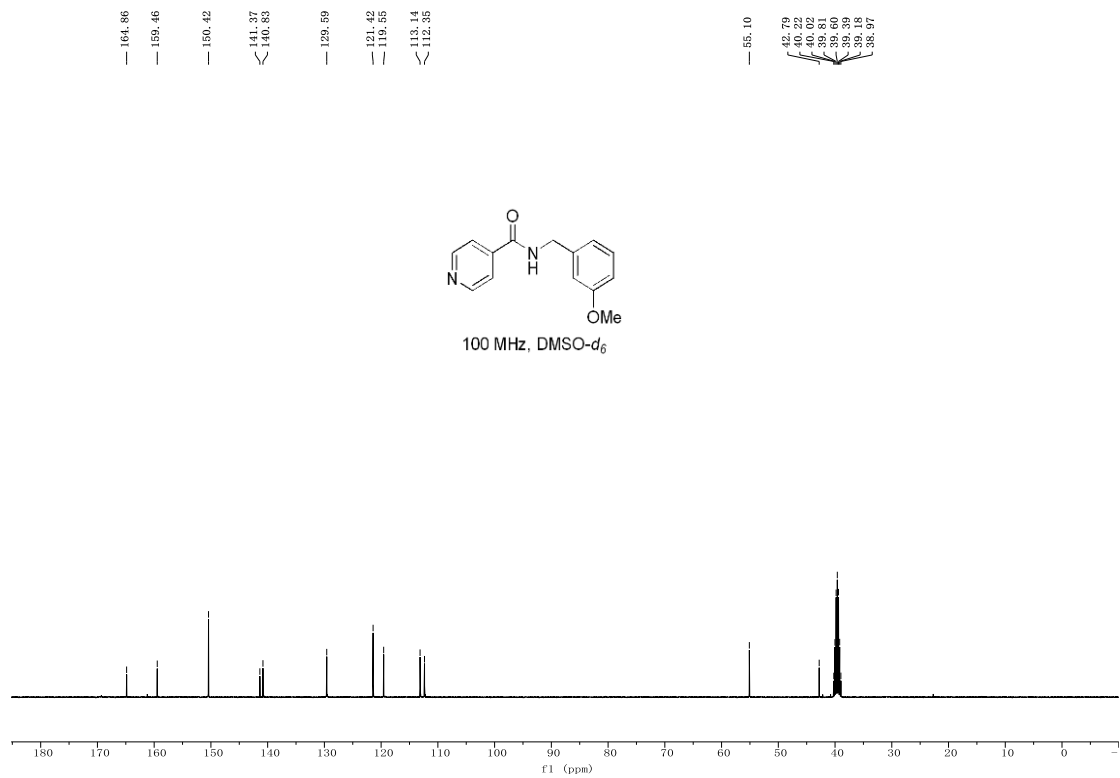



### 9-<sup>1</sup>H NMR

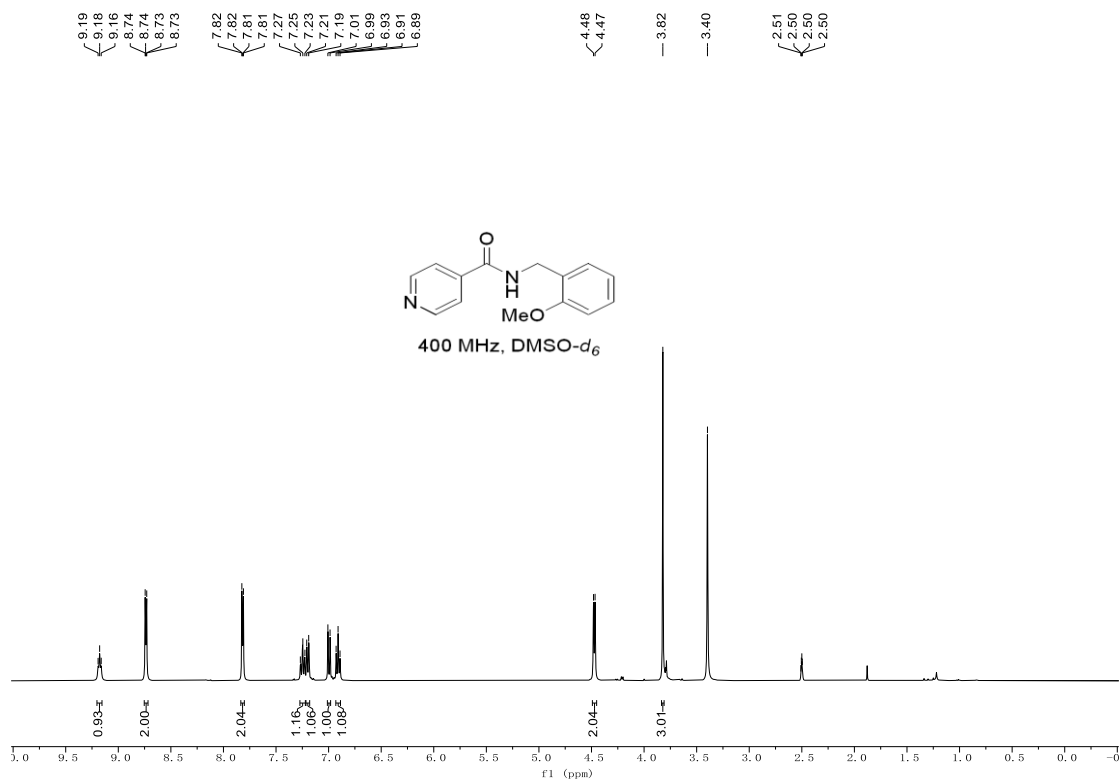

### 9-<sup>13</sup>C NMR

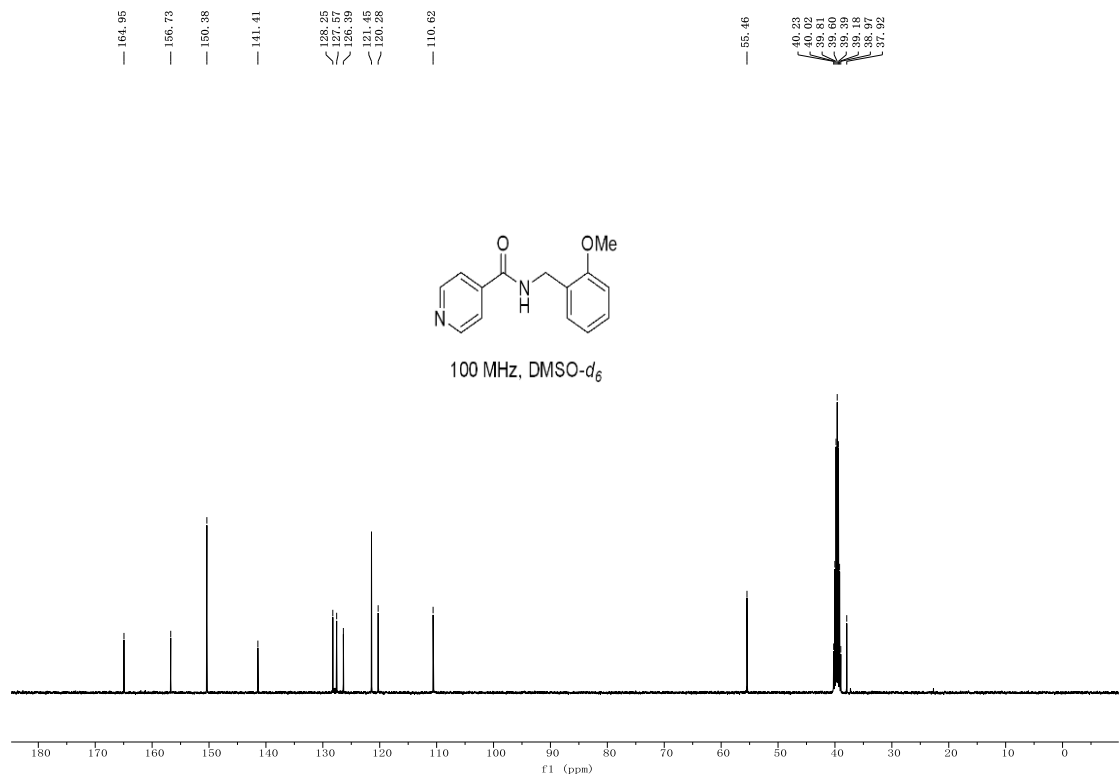

### 10-<sup>1</sup>H NMR

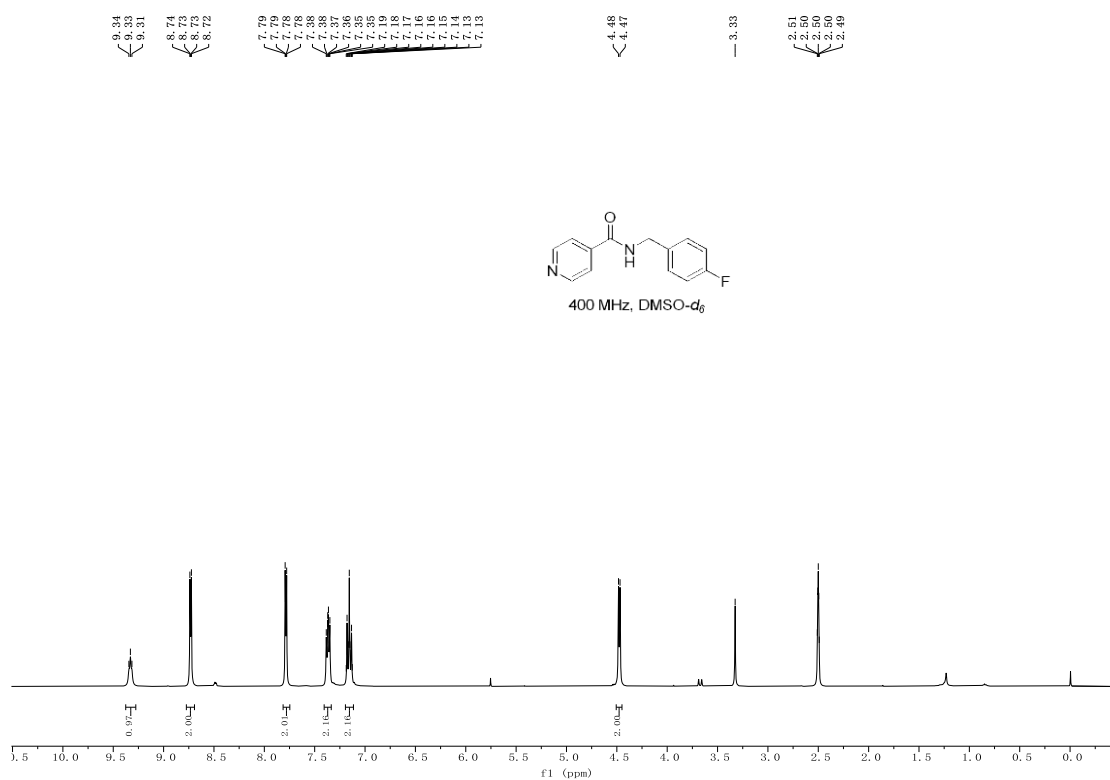

### 10-<sup>13</sup>C NMR

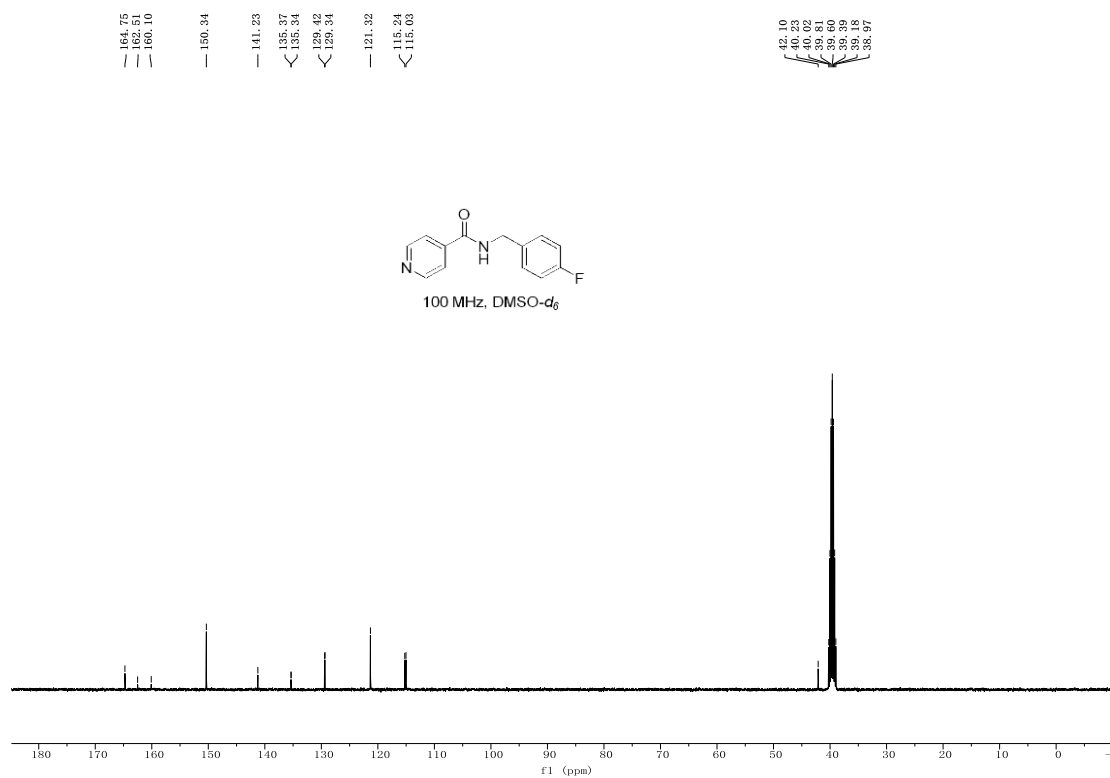

### 11-<sup>1</sup>H NMR

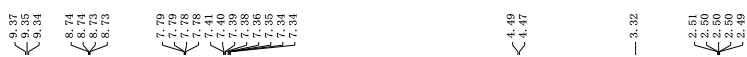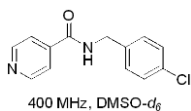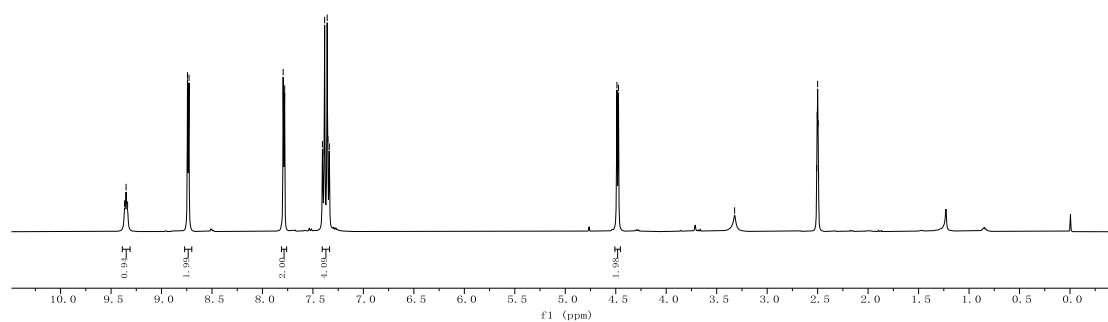

### 11-<sup>13</sup>C NMR

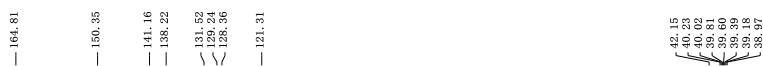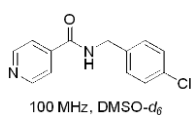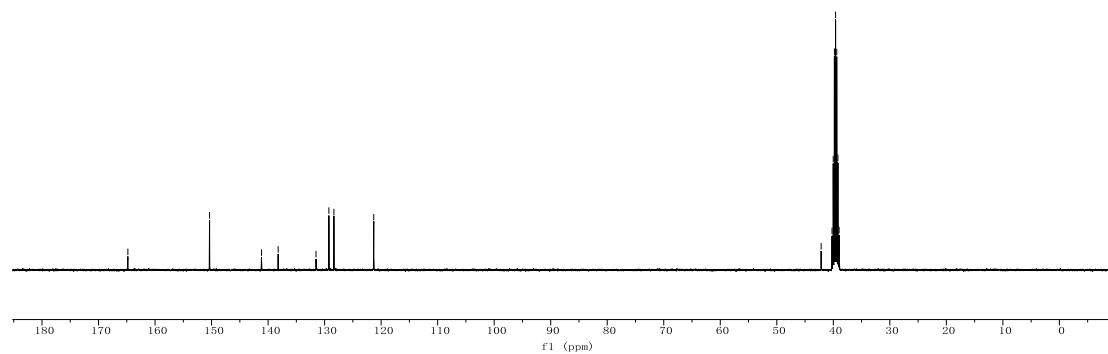

## 12-<sup>1</sup>H NMR

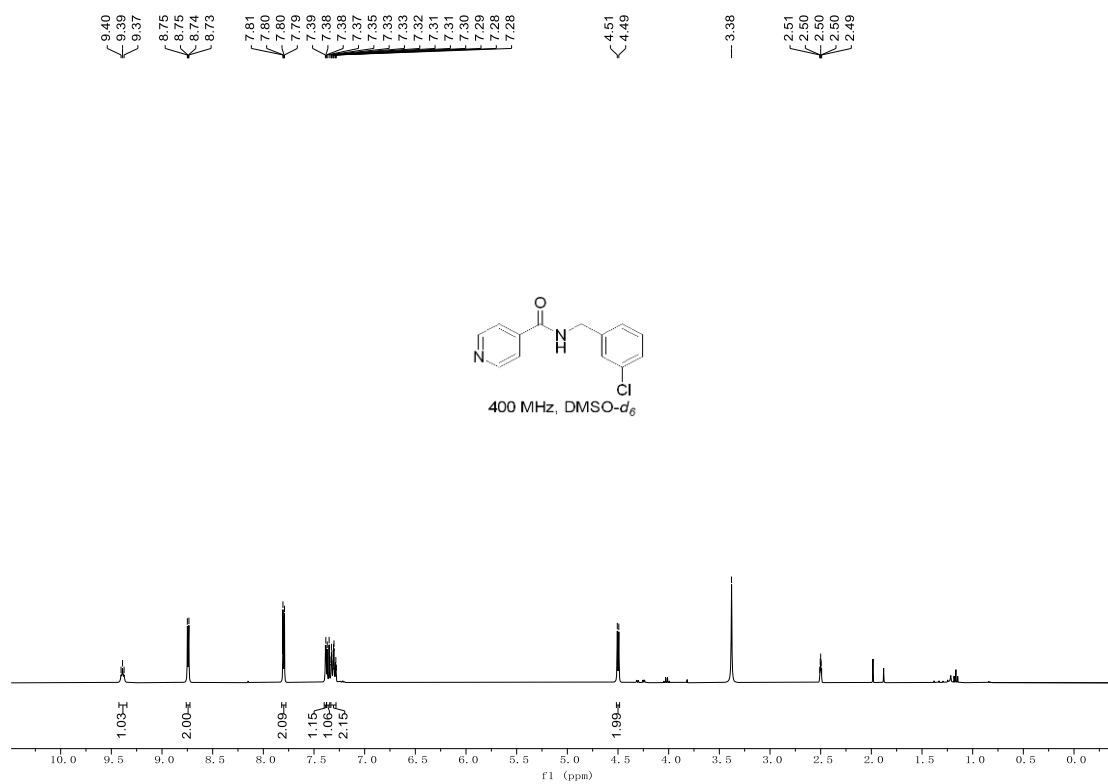

## 12-<sup>13</sup>C NMR

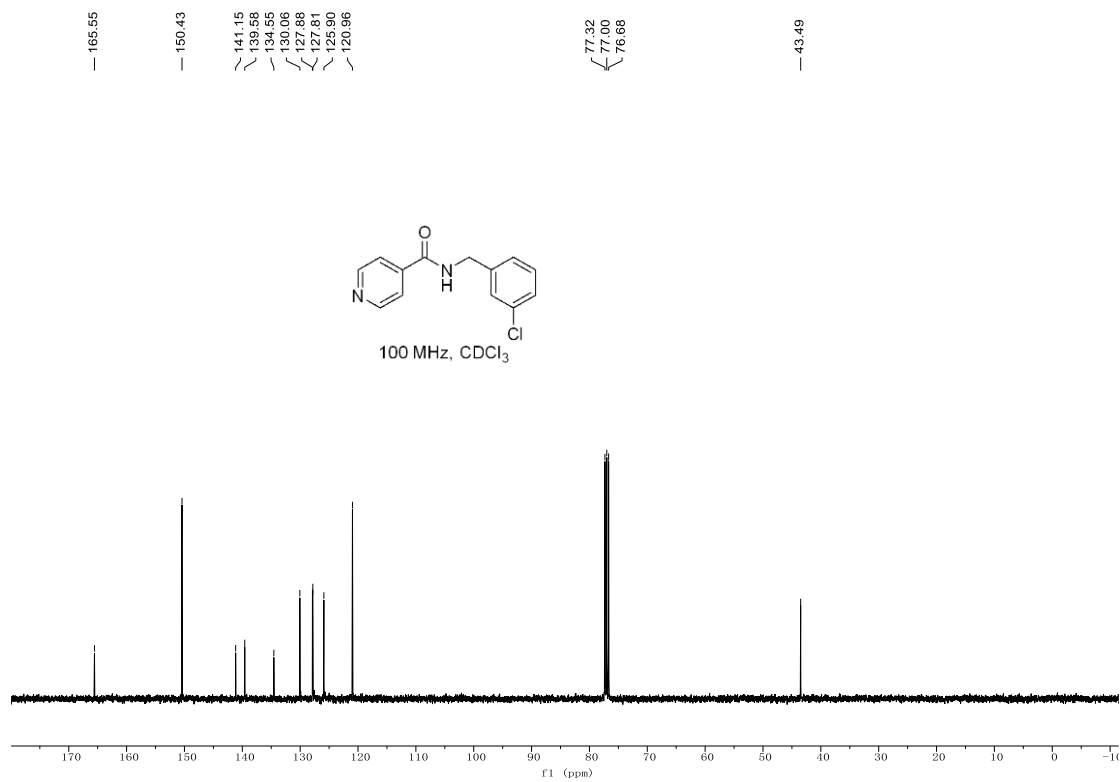

### 13-<sup>1</sup>H NMR

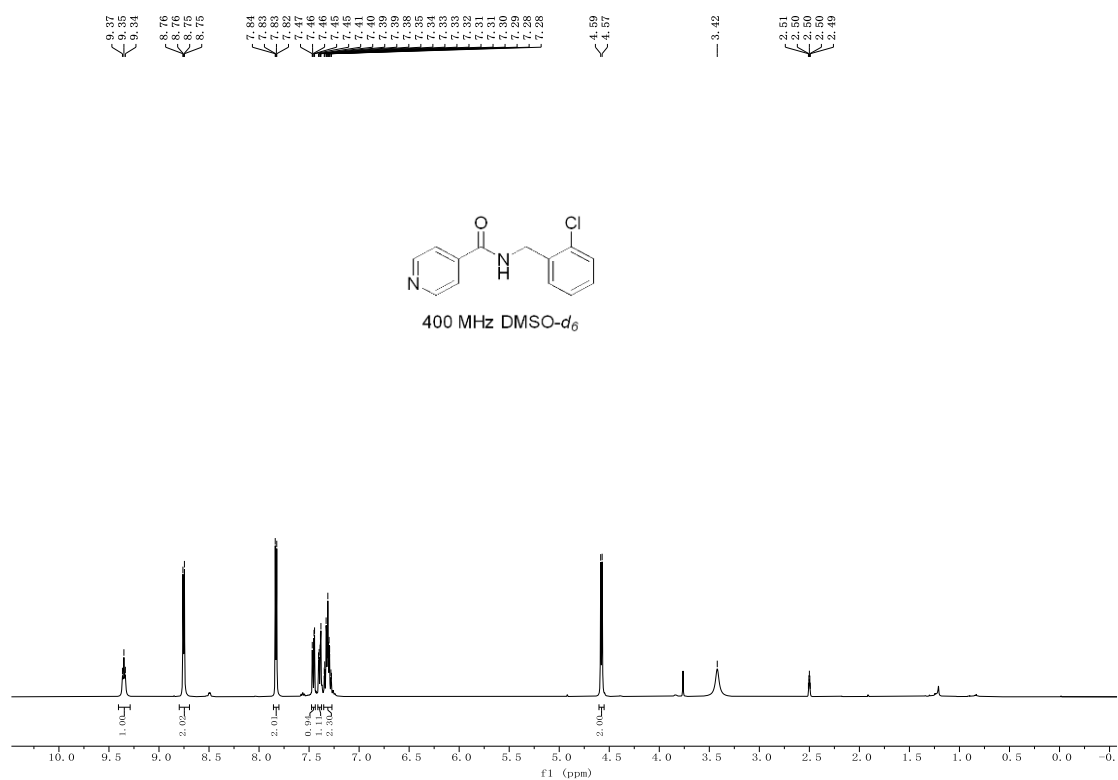

### 13-<sup>13</sup>C NMR

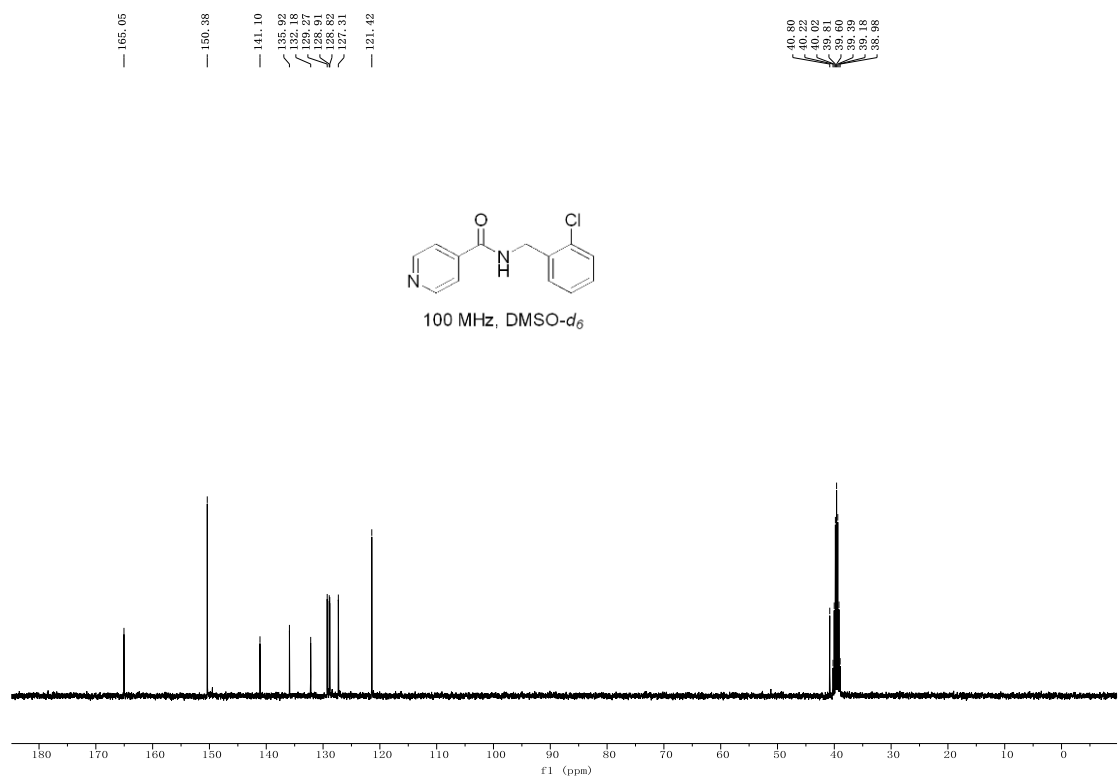

### 14-<sup>1</sup>H NMR

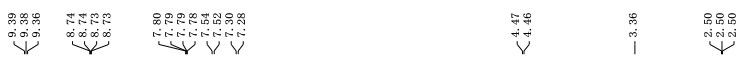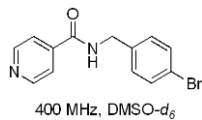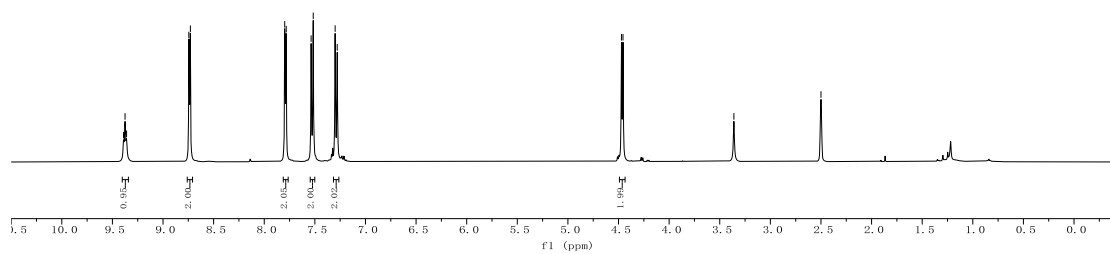

### 14-<sup>13</sup>C NMR

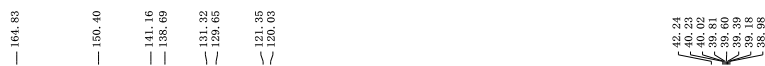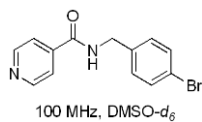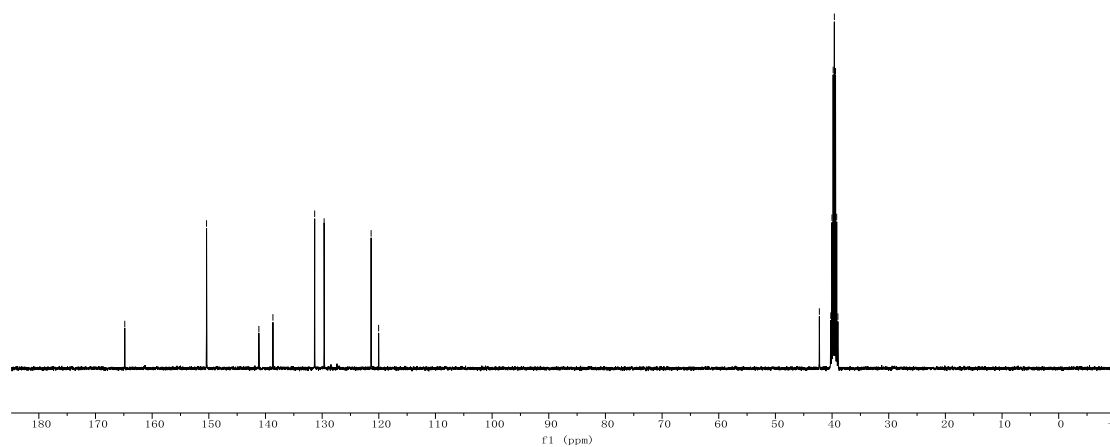

### 15-<sup>1</sup>H NMR

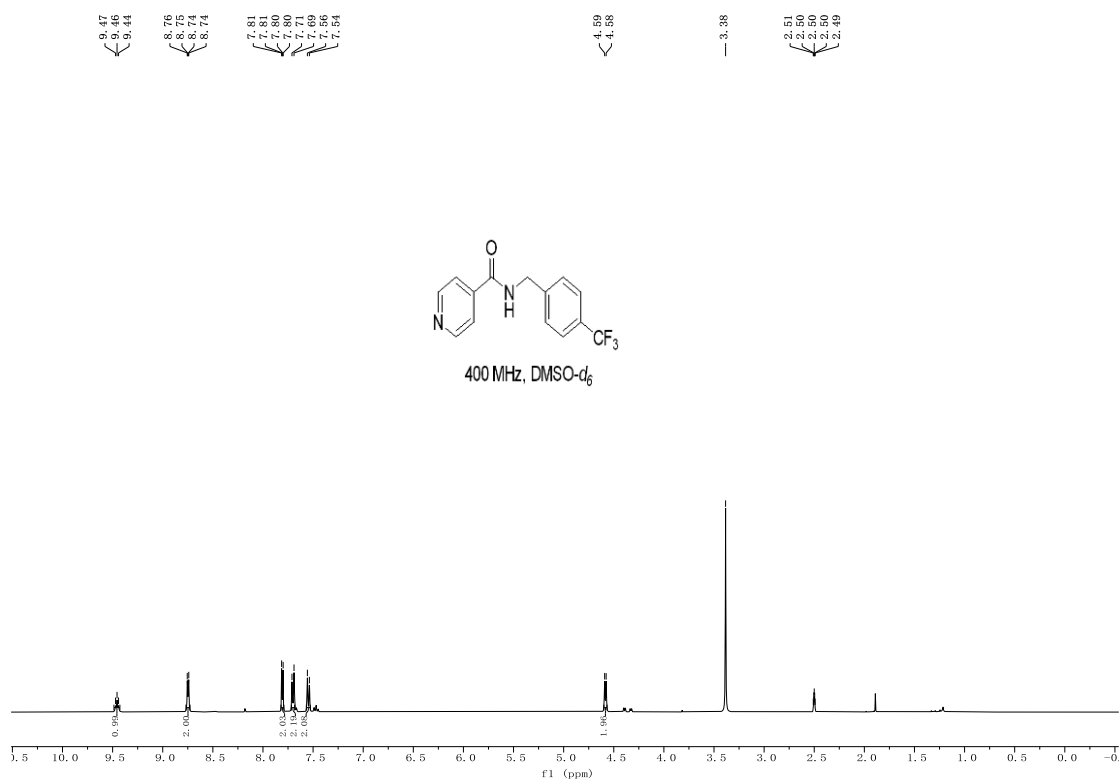

### 15-<sup>13</sup>C NMR

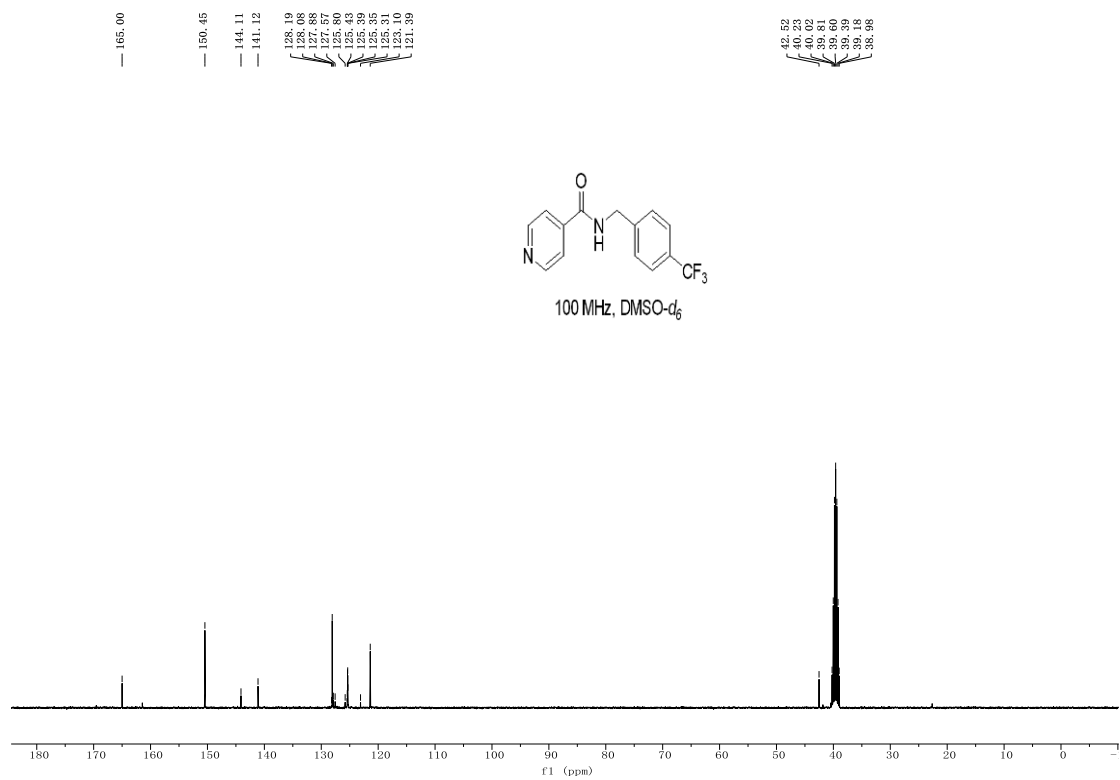

### 16-<sup>1</sup>H NMR

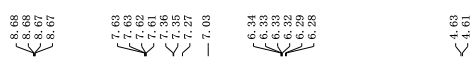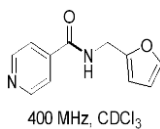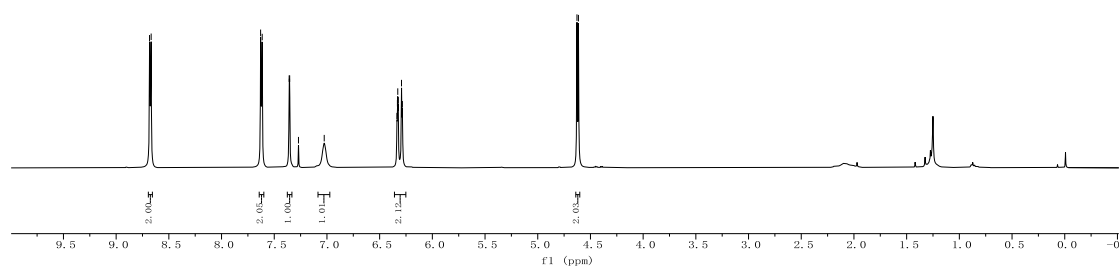

### 16-<sup>13</sup>C NMR

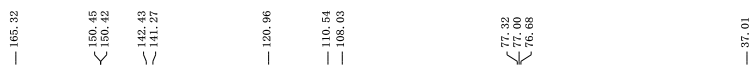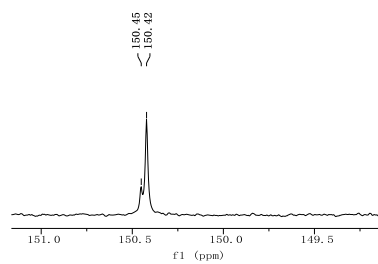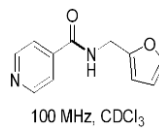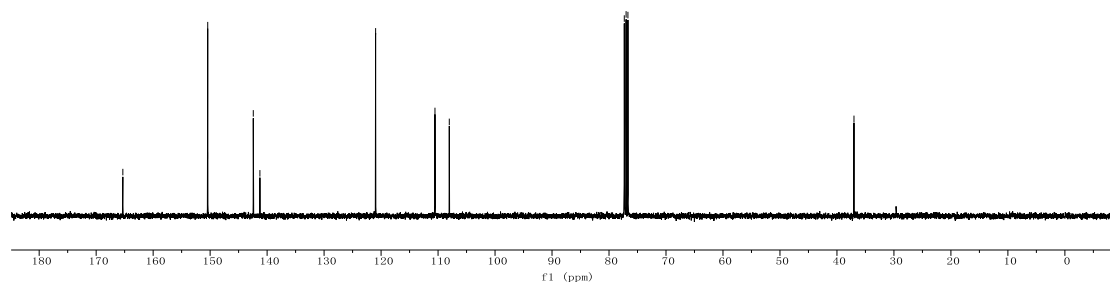



### 17-<sup>1</sup>H NMR

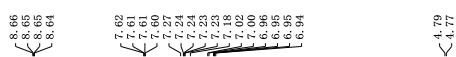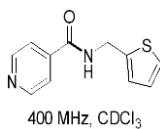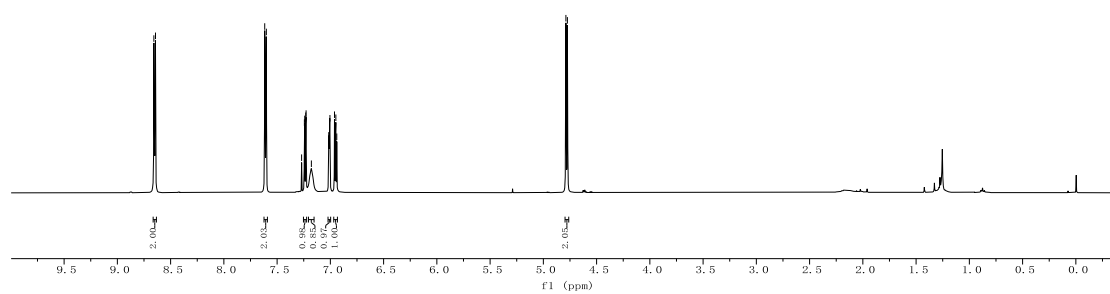

### 17-<sup>13</sup>C NMR

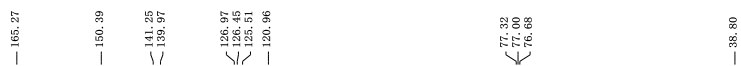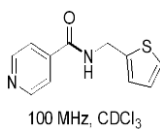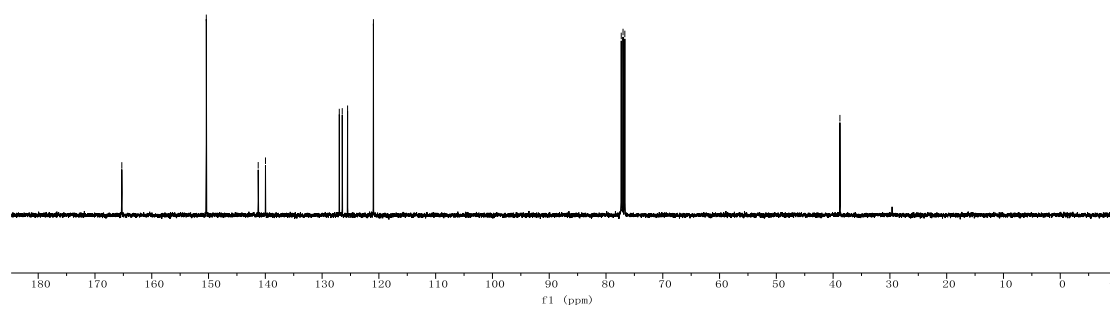

### 18-<sup>1</sup>H NMR

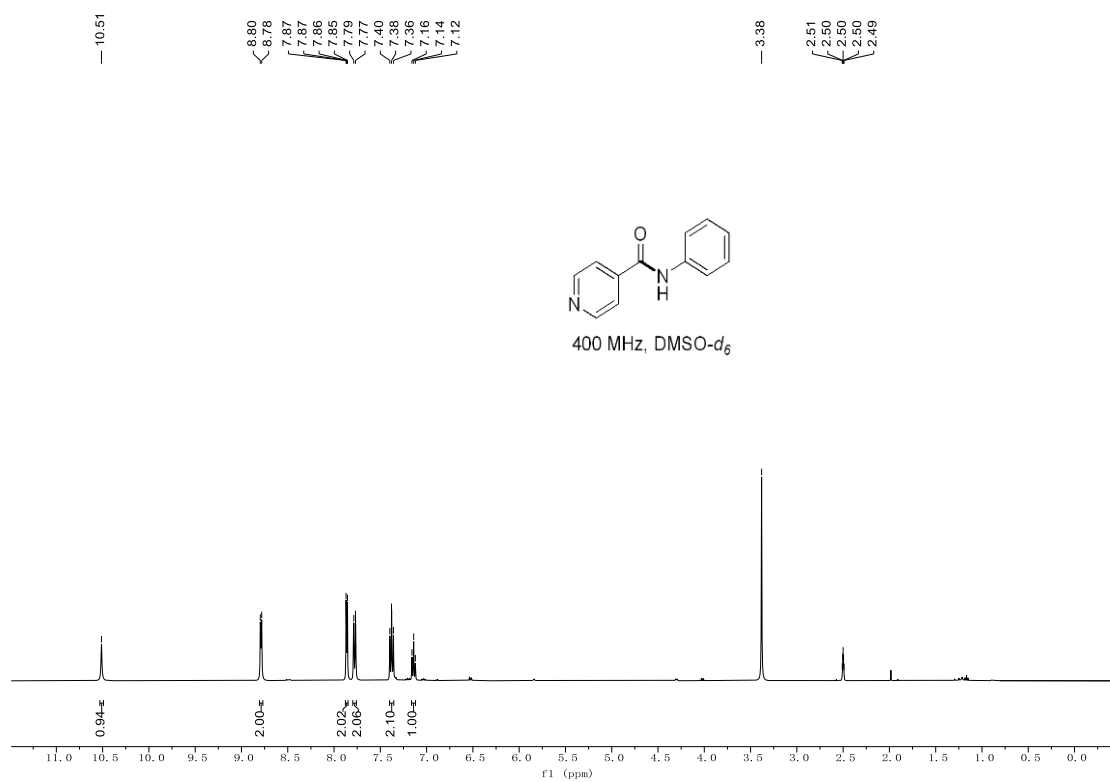

### 18-<sup>13</sup>C NMR

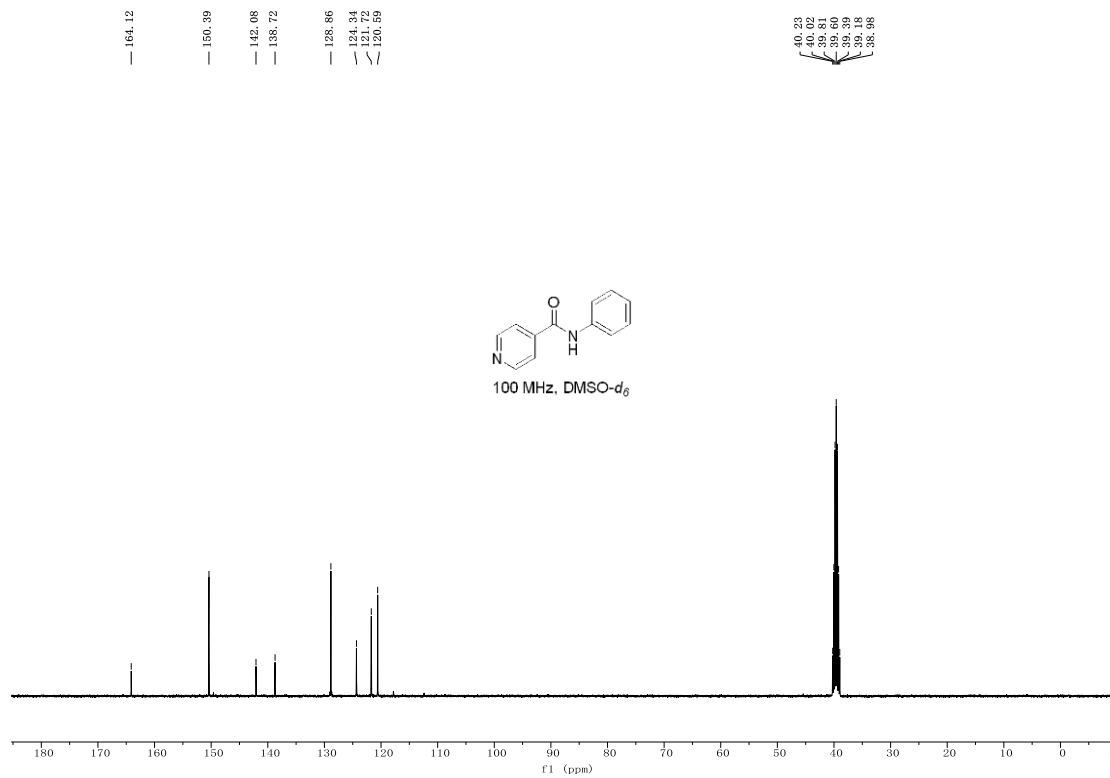

### 19-<sup>1</sup>H NMR

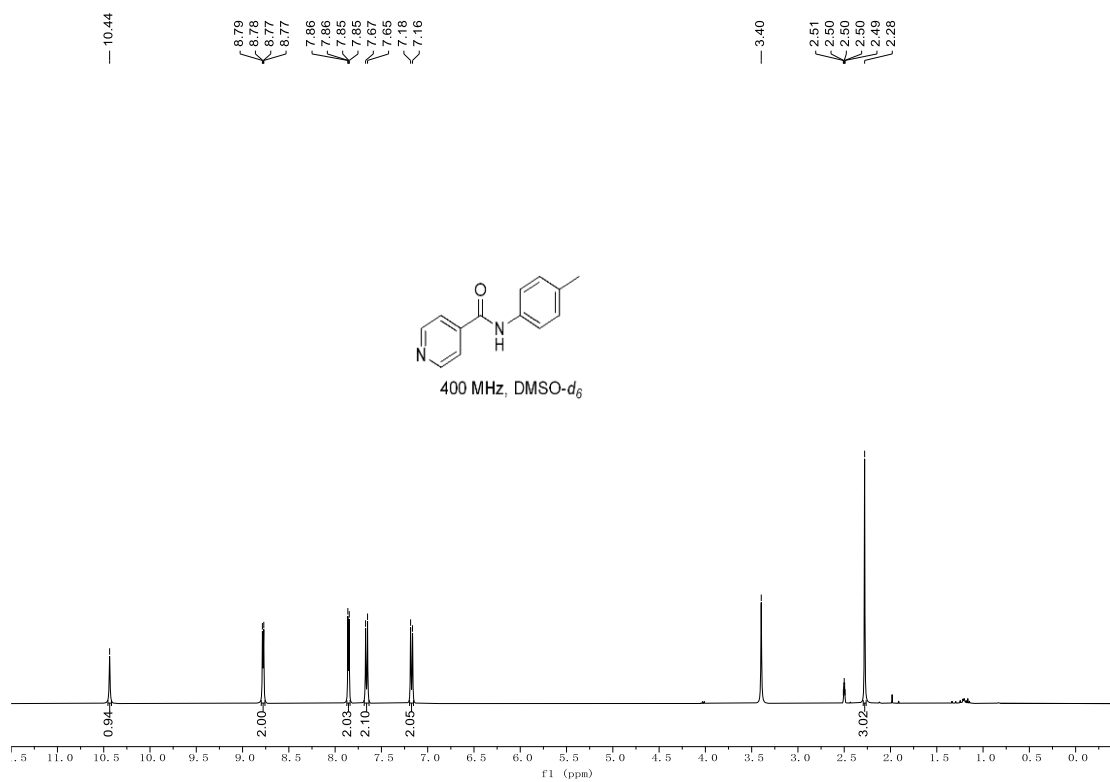

### 19-<sup>13</sup>C NMR

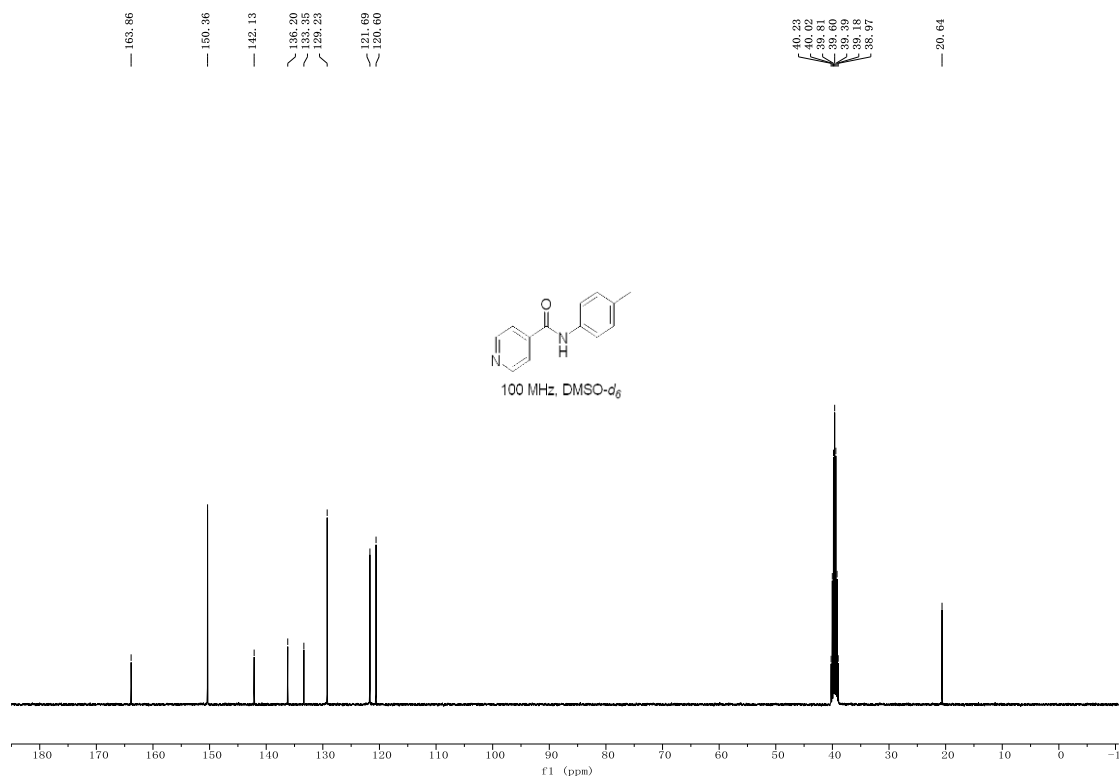

## 20-<sup>1</sup>H NMR

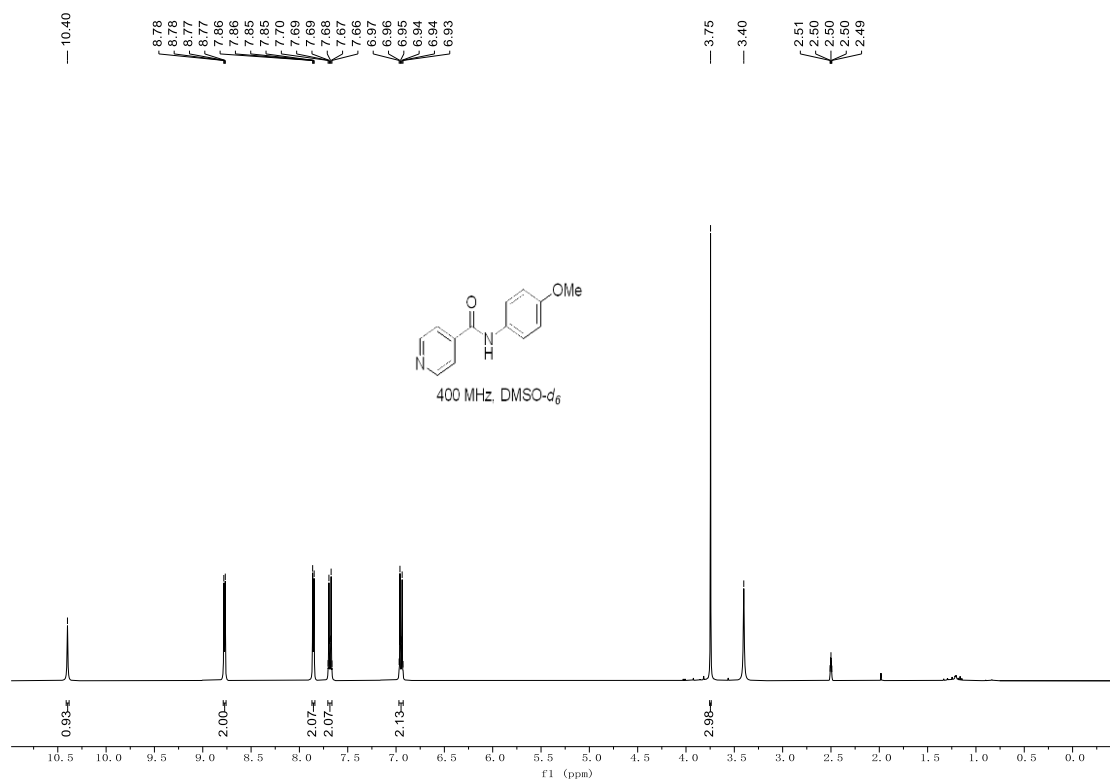

## 20-<sup>13</sup>C NMR

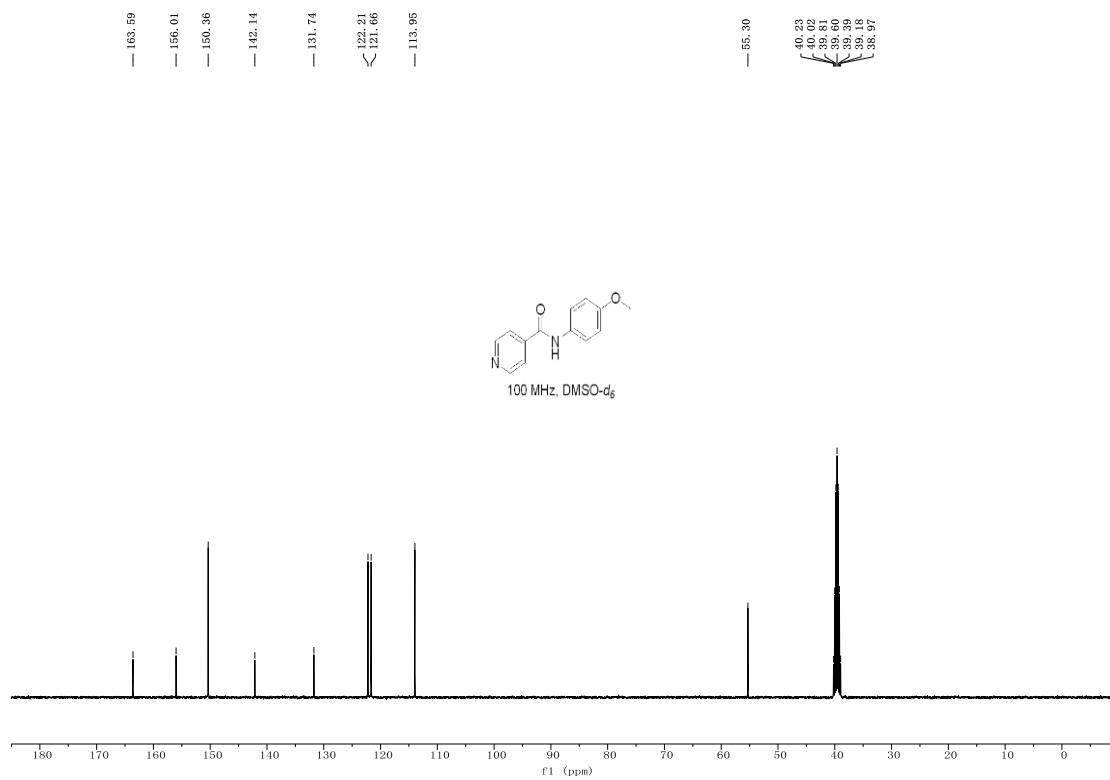

## 21-<sup>1</sup>H NMR

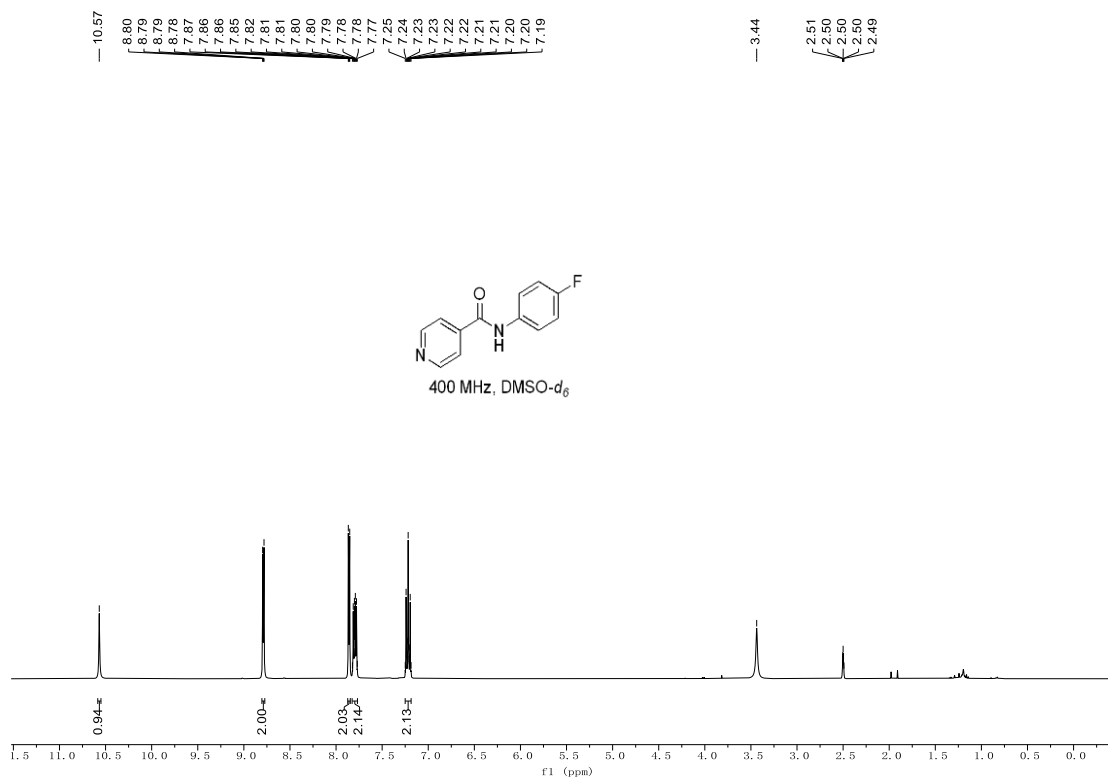

## 21-<sup>13</sup>C NMR

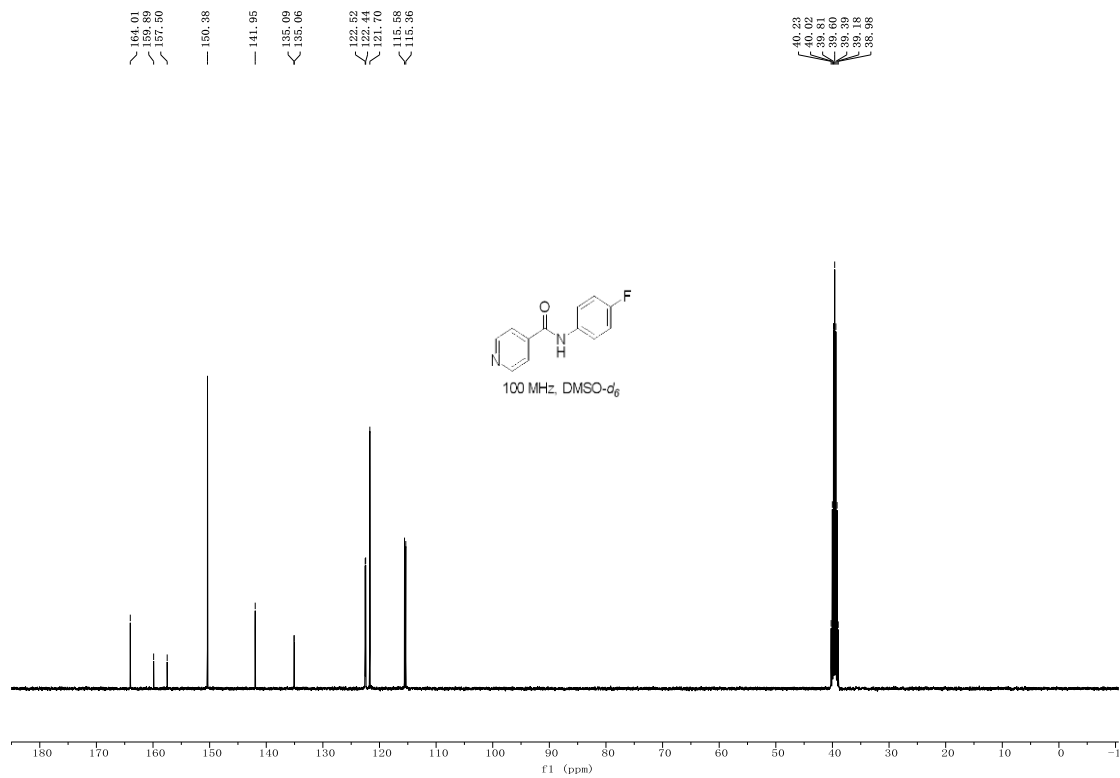

## 22-<sup>1</sup>H NMR

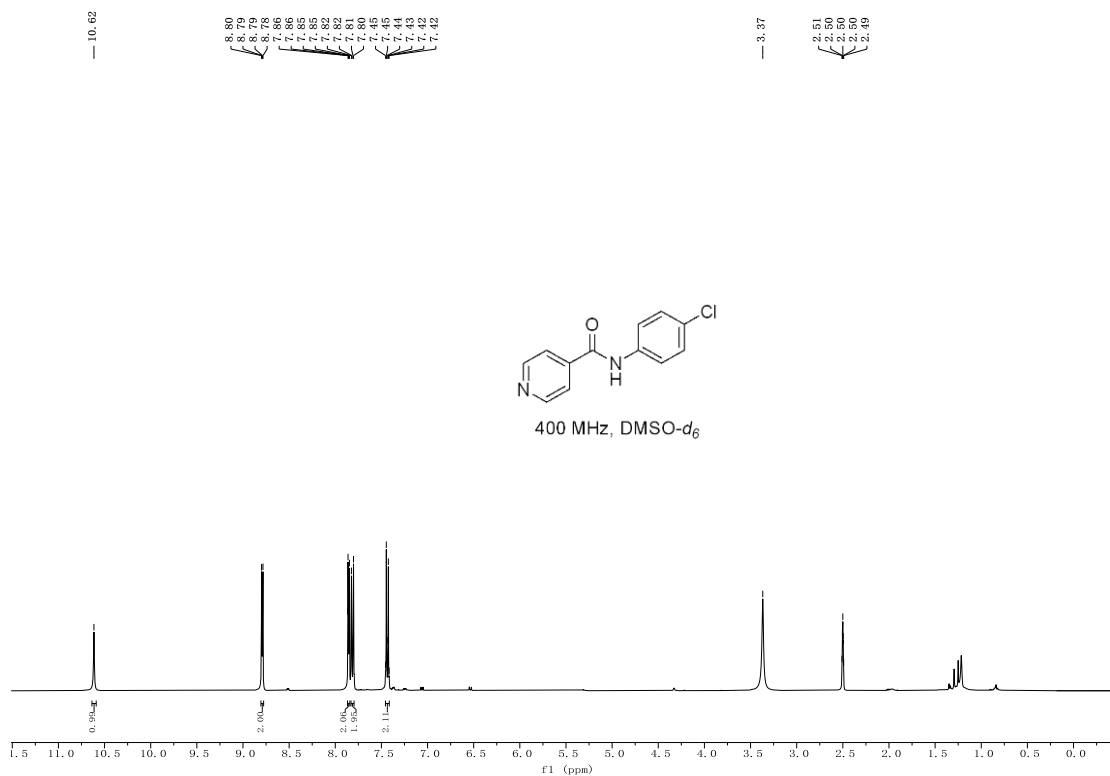

## 22-<sup>13</sup>C NMR

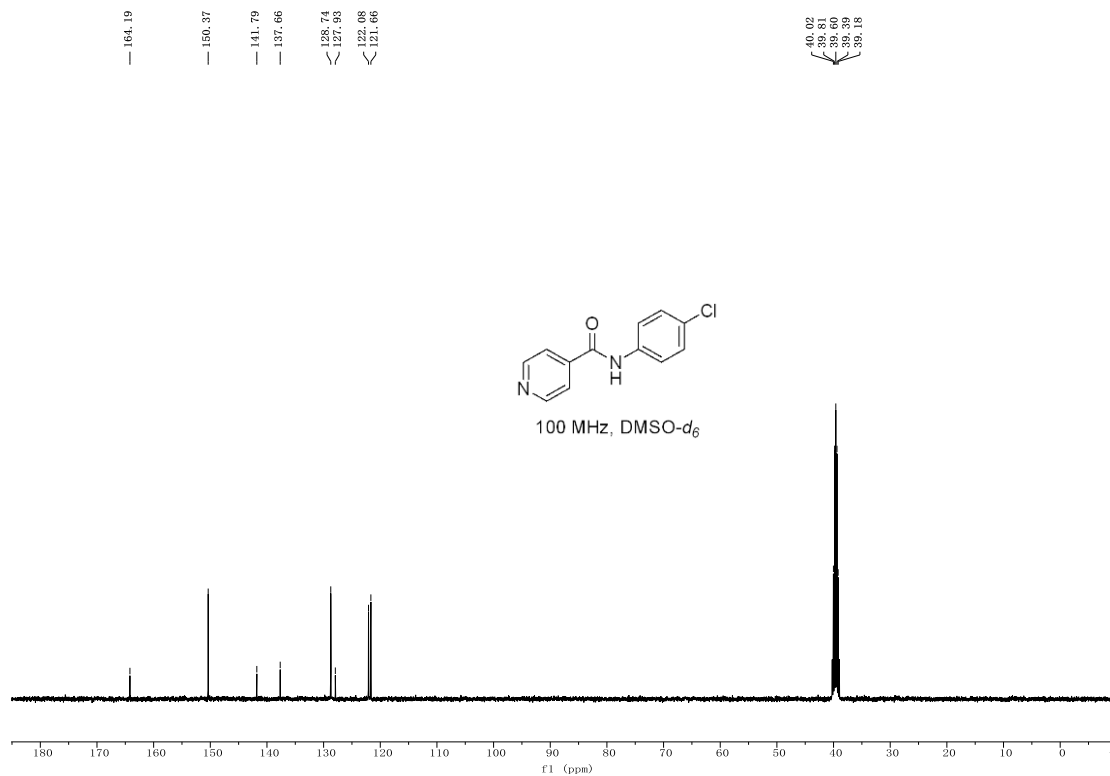

### 23-<sup>1</sup>H NMR

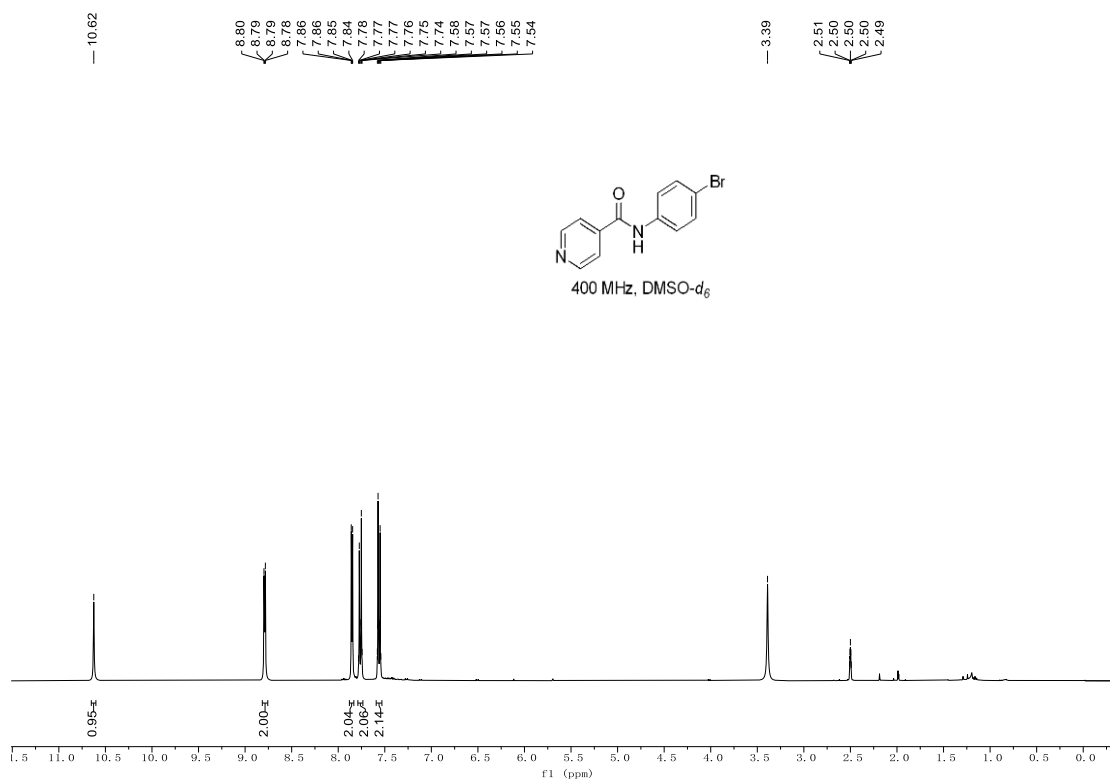

### 23-<sup>13</sup>C NMR

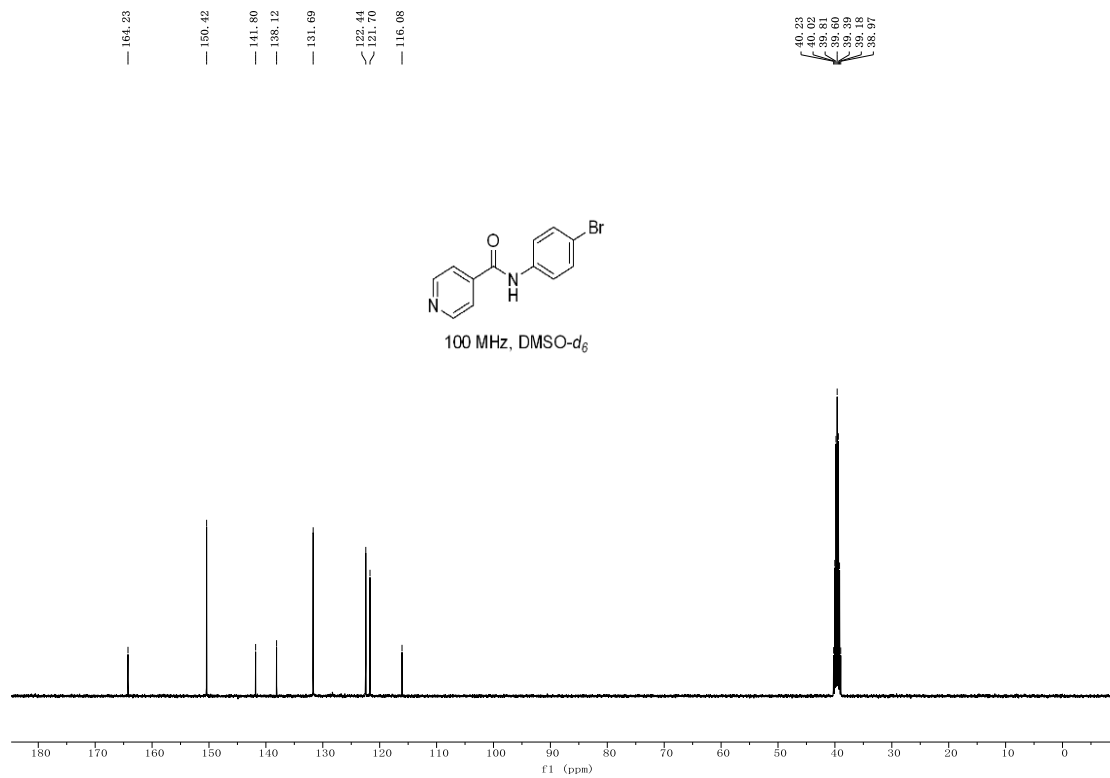

**24-<sup>1</sup>H NMR**

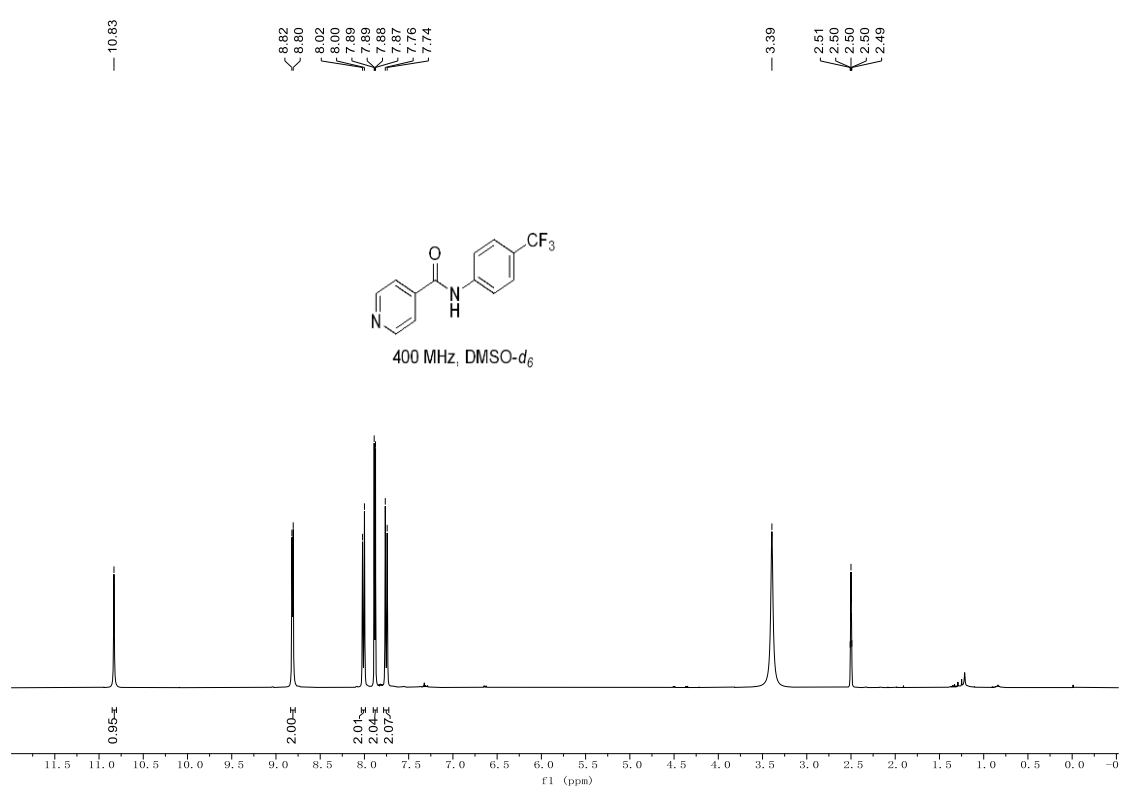

**24-<sup>13</sup>C NMR**

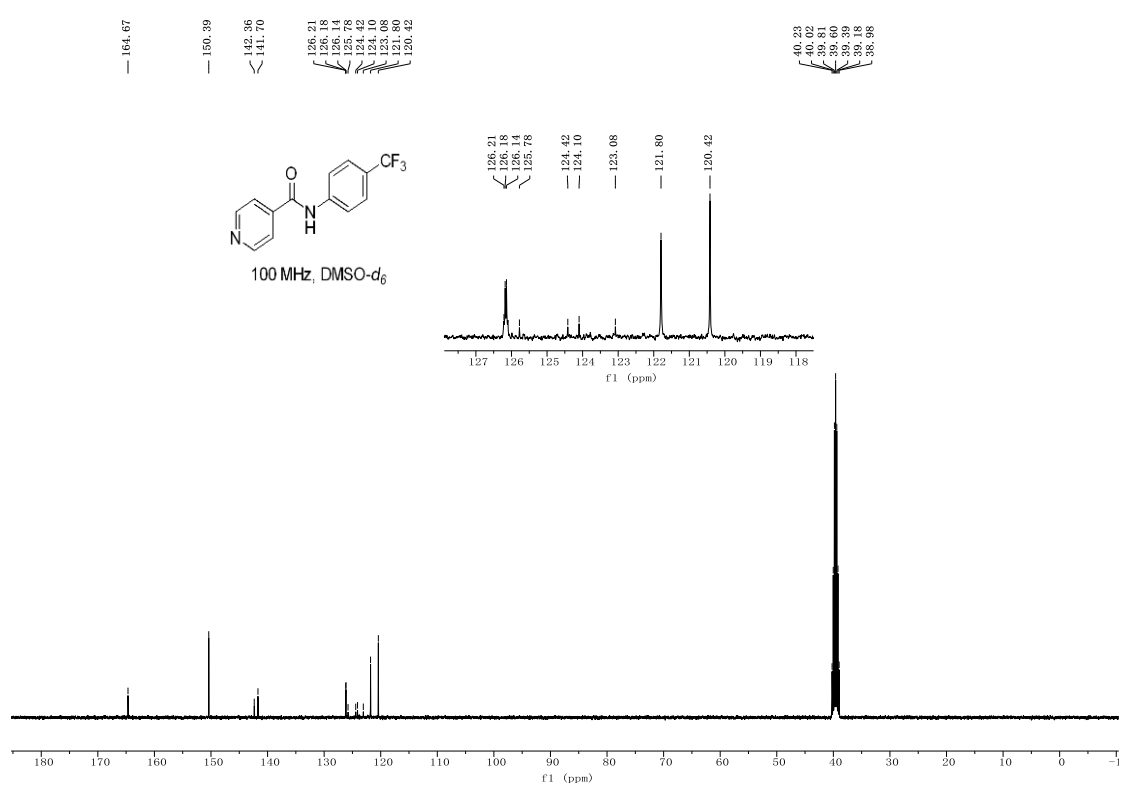



## 25-<sup>1</sup>H NMR

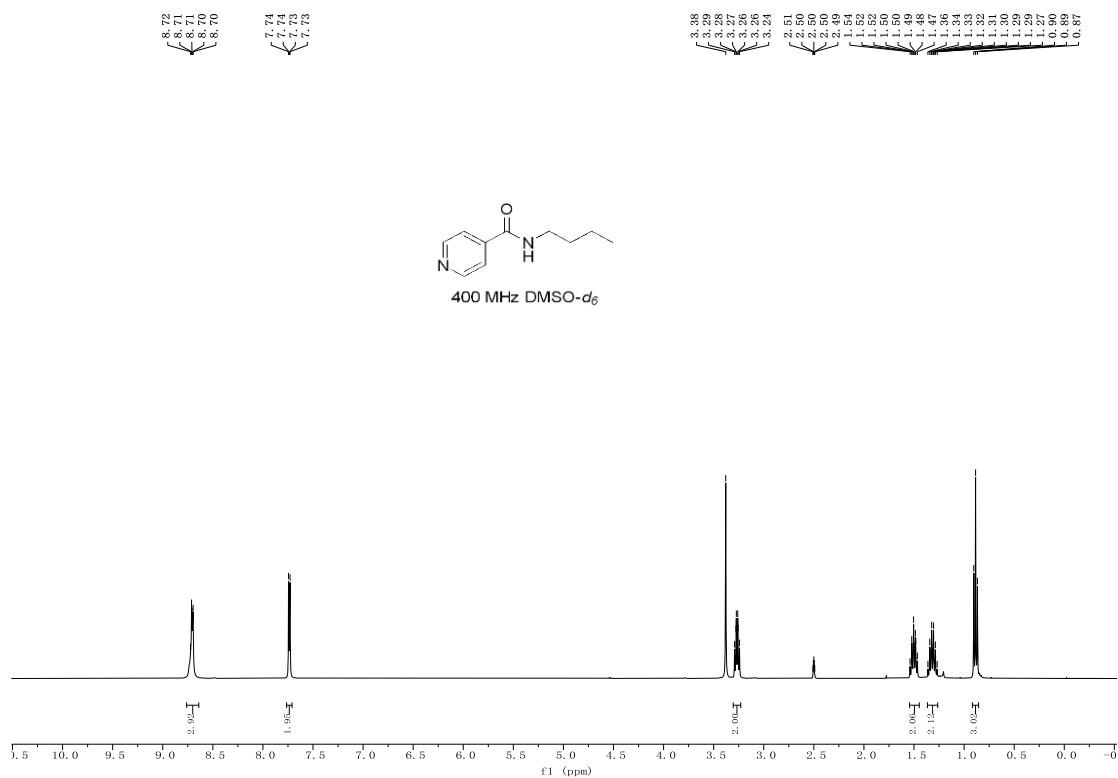

## 25-<sup>13</sup>C NMR

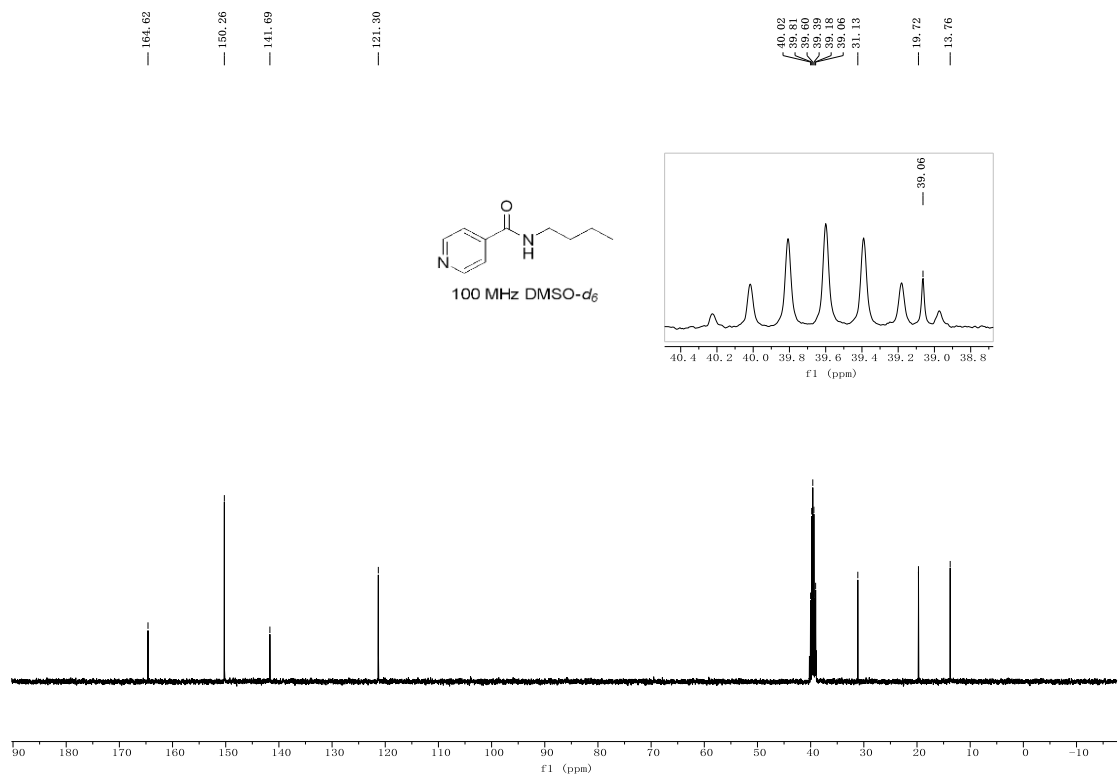

## 26-<sup>1</sup>H NMR

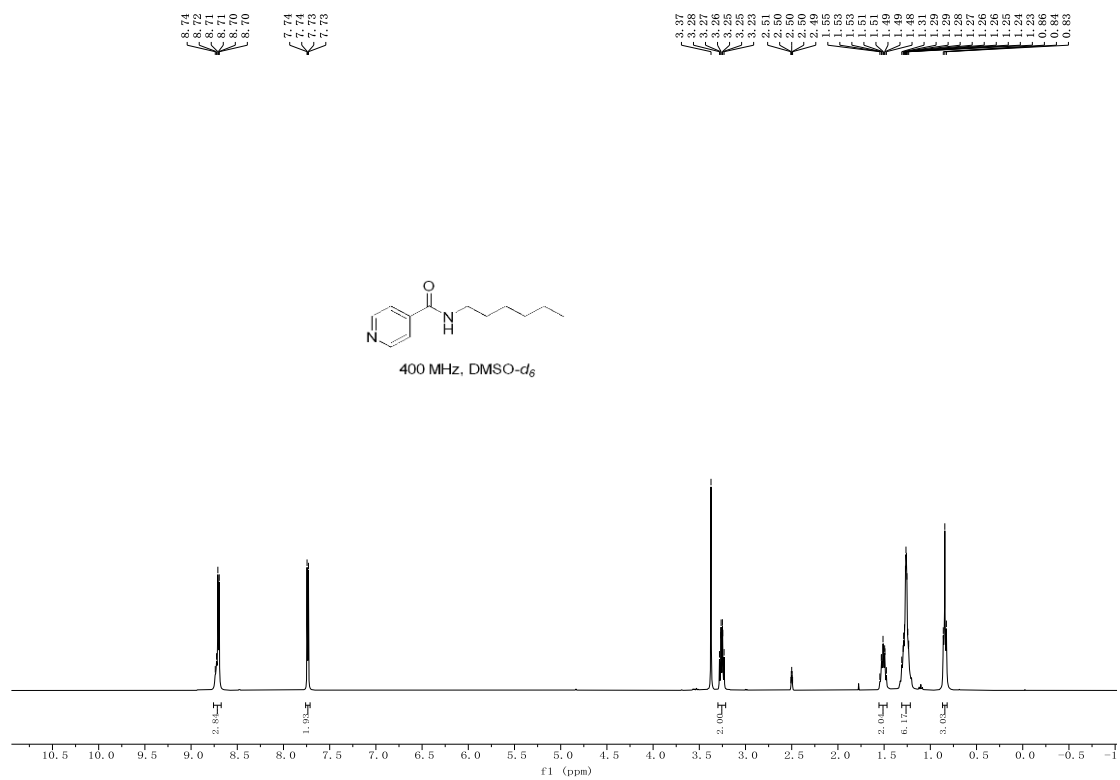

## 26-<sup>13</sup>C NMR

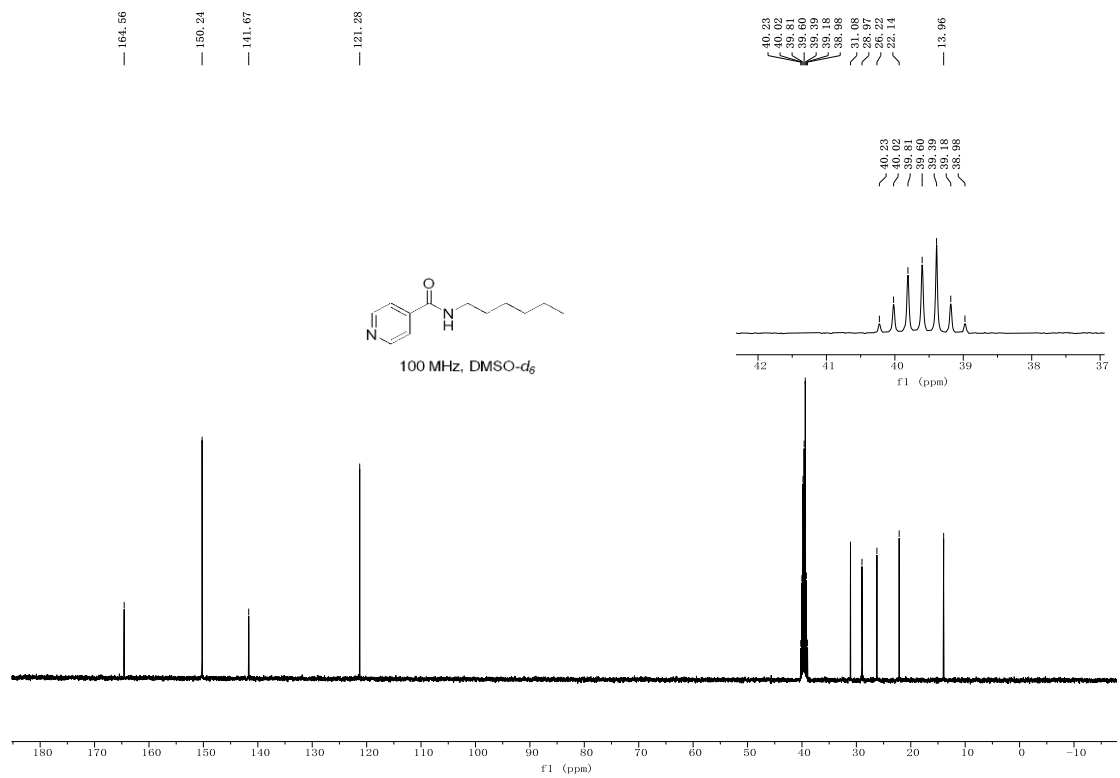

## 27-<sup>1</sup>H NMR

8.70  
8.70  
8.69  
8.69  
8.52  
8.50

7.74  
7.74  
7.73  
7.73

3.77  
3.77  
3.76  
3.75  
3.74  
3.37

2.51  
2.50  
2.50  
2.49  
2.49  
1.84  
1.83  
1.82  
1.80  
1.74  
1.73  
1.72  
1.71  
1.68  
1.62  
1.61  
1.58  
1.57  
1.35  
1.32  
1.29  
1.27  
1.25  
1.24  
1.21  
1.21

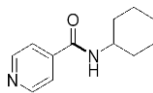

400 MHz, DMSO-*d*<sub>6</sub>

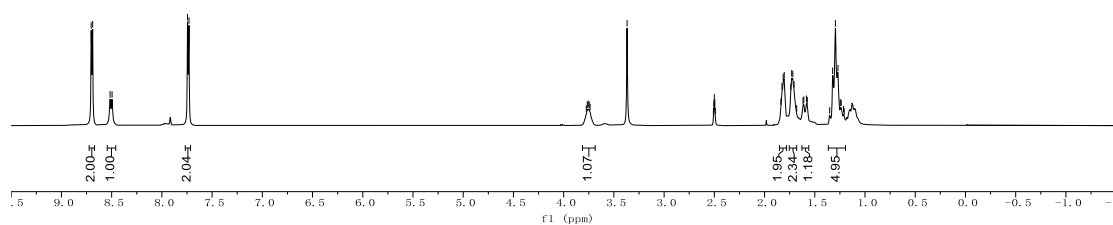

## 27-<sup>13</sup>C NMR

163.88  
150.20  
141.86  
121.46

48.66  
40.22  
40.02  
39.60  
39.60  
39.39  
38.18  
38.97  
32.35  
25.31  
24.97

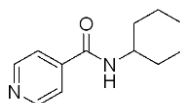

100 MHz, DMSO-*d*<sub>6</sub>

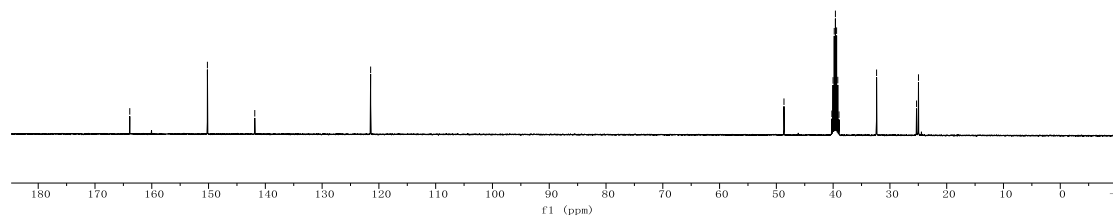

## 28-<sup>1</sup>H NMR

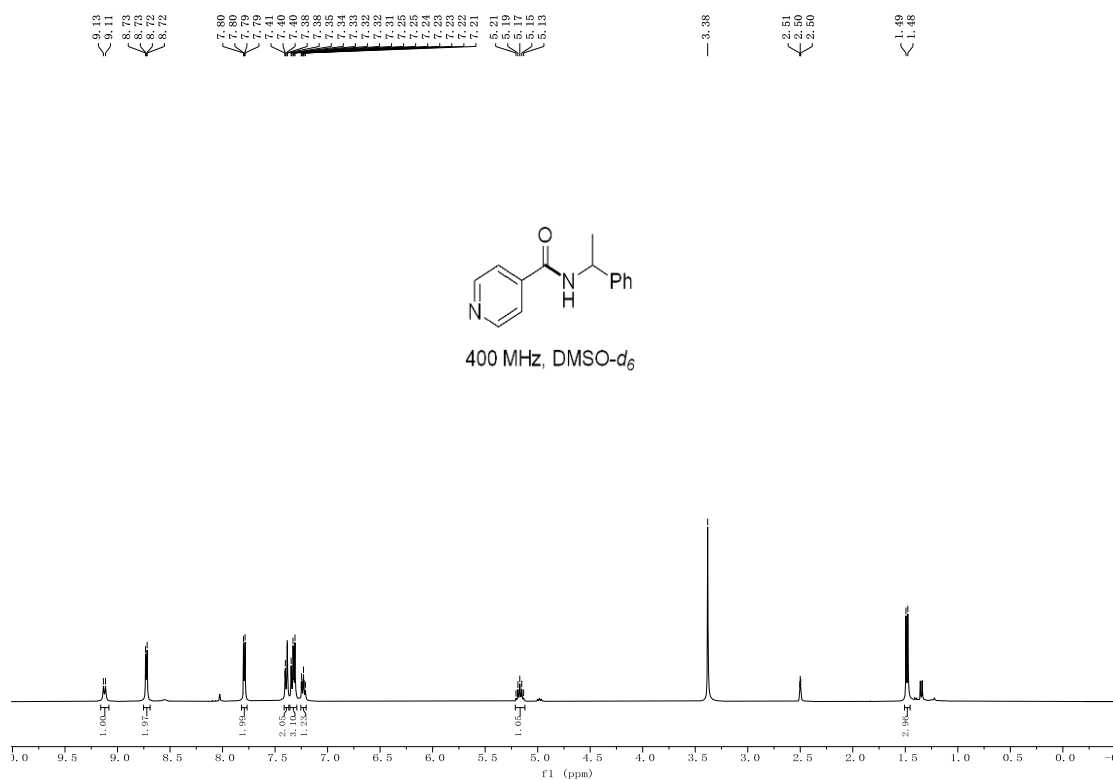

## 28-<sup>13</sup>C NMR

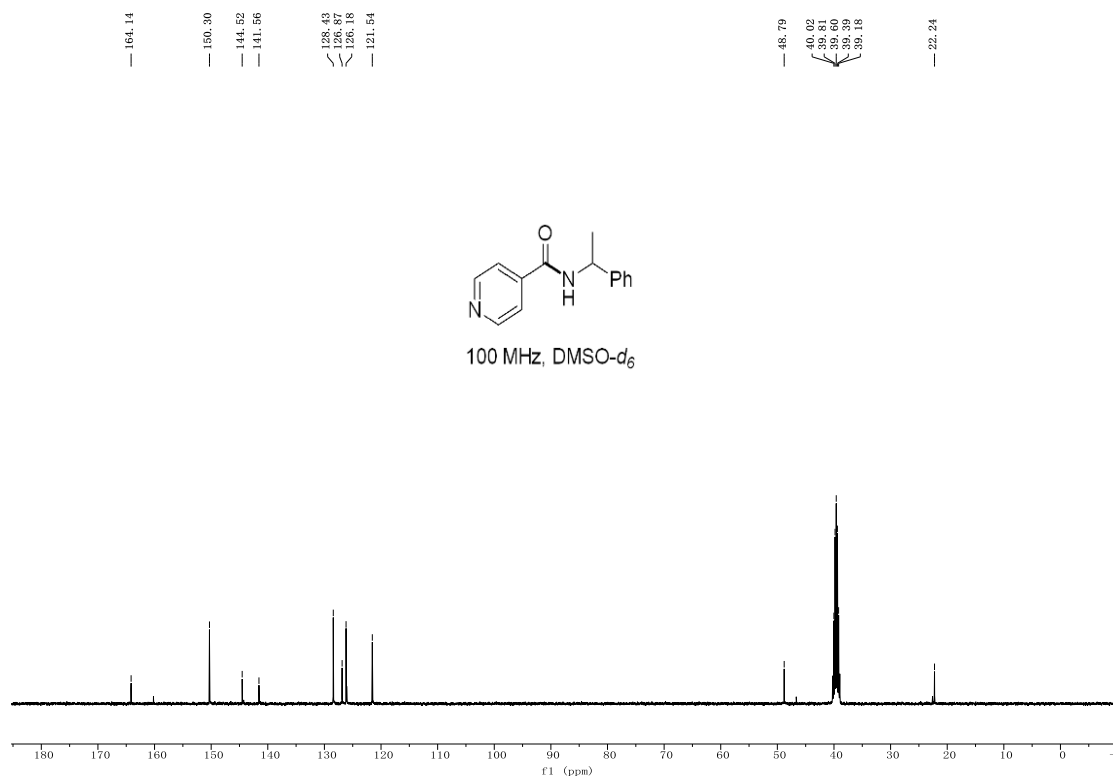

### 29-<sup>1</sup>H NMR

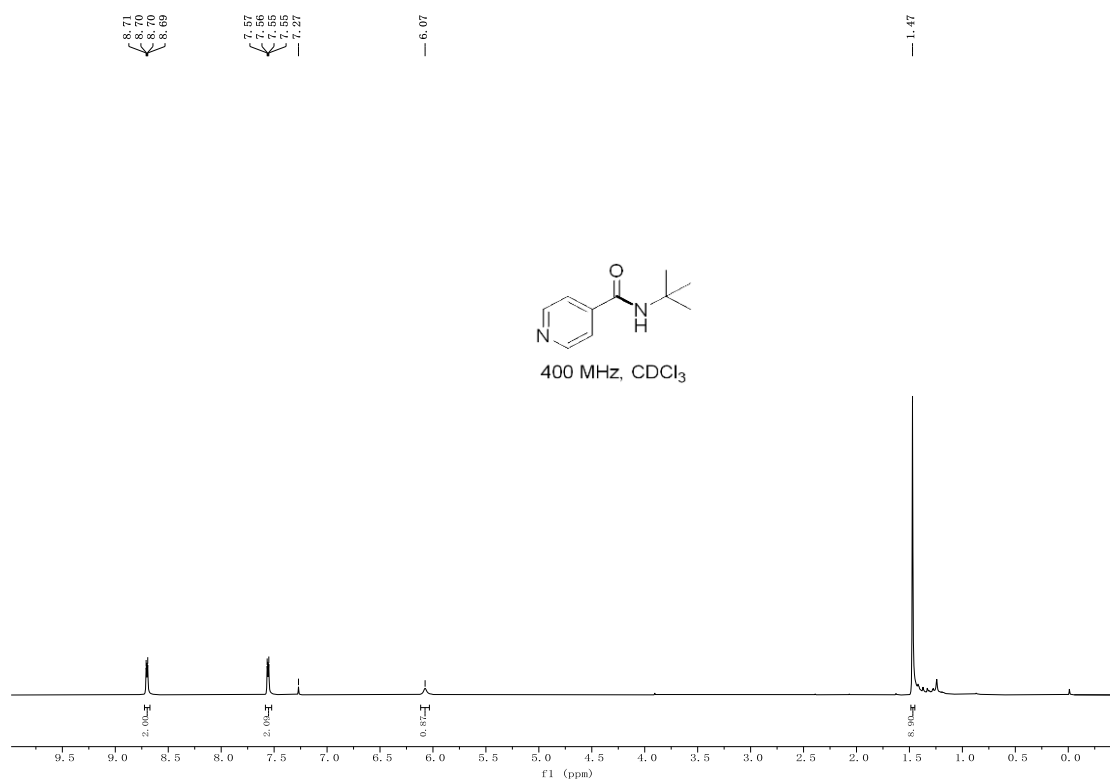

### 29-<sup>13</sup>C NMR

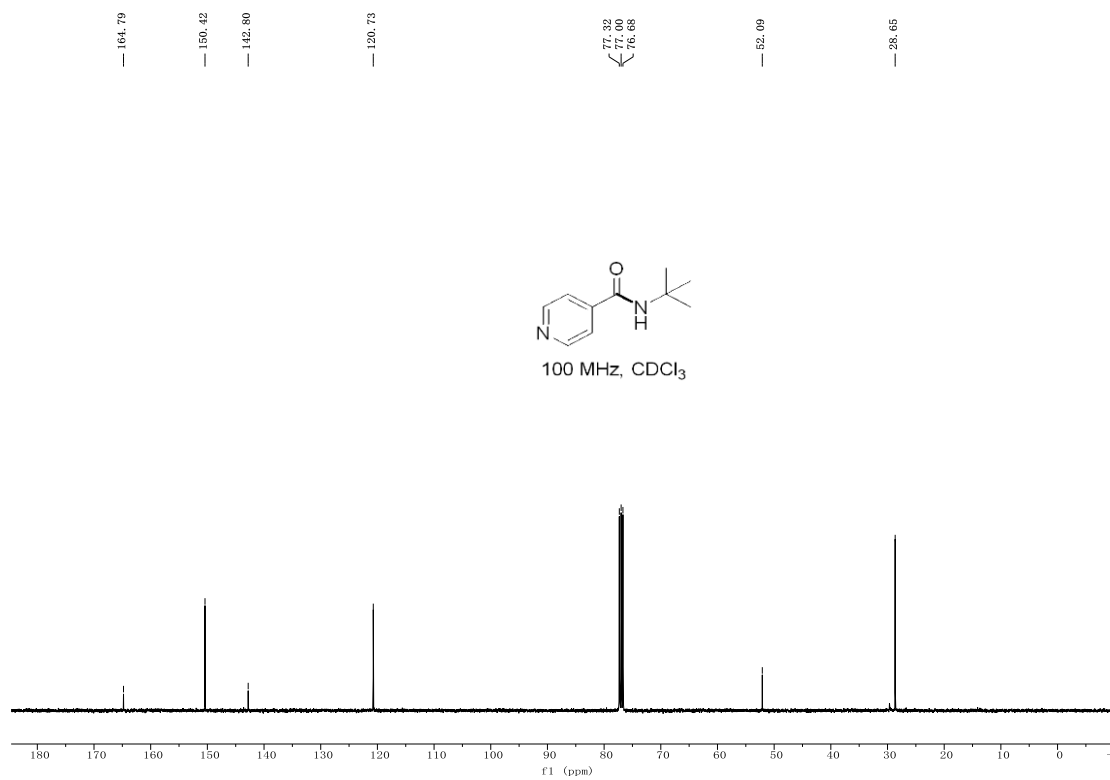

### 30-<sup>1</sup>H NMR

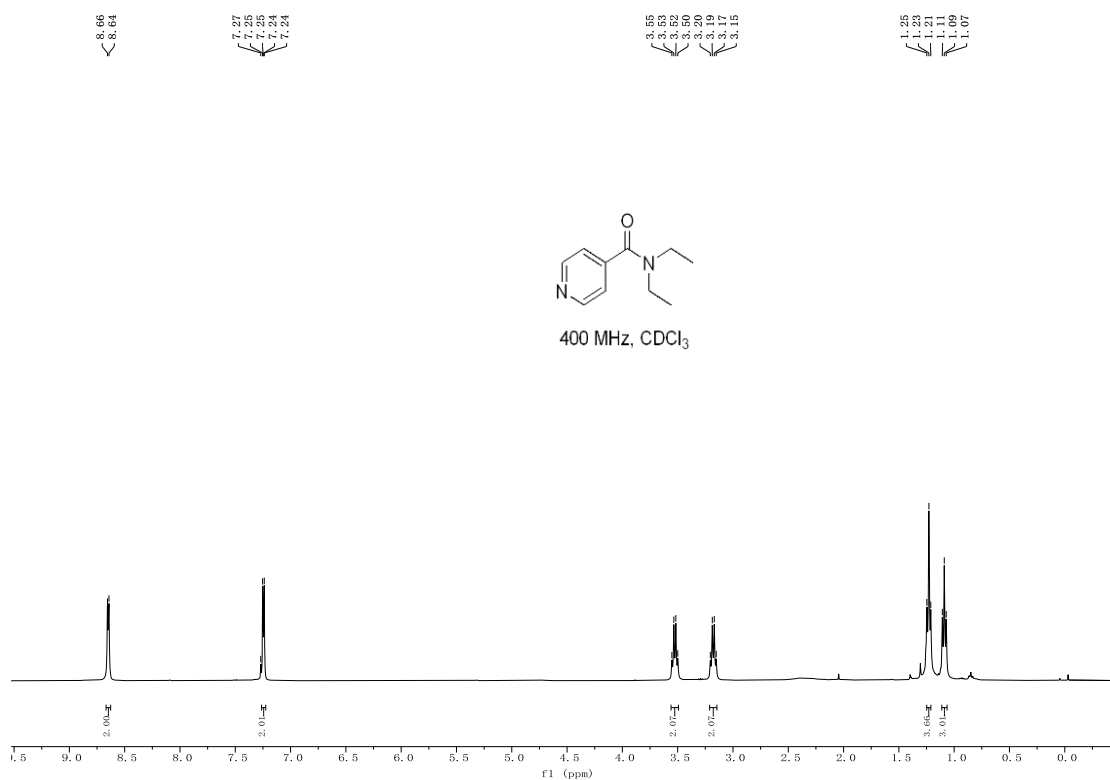

### 30-<sup>13</sup>C NMR

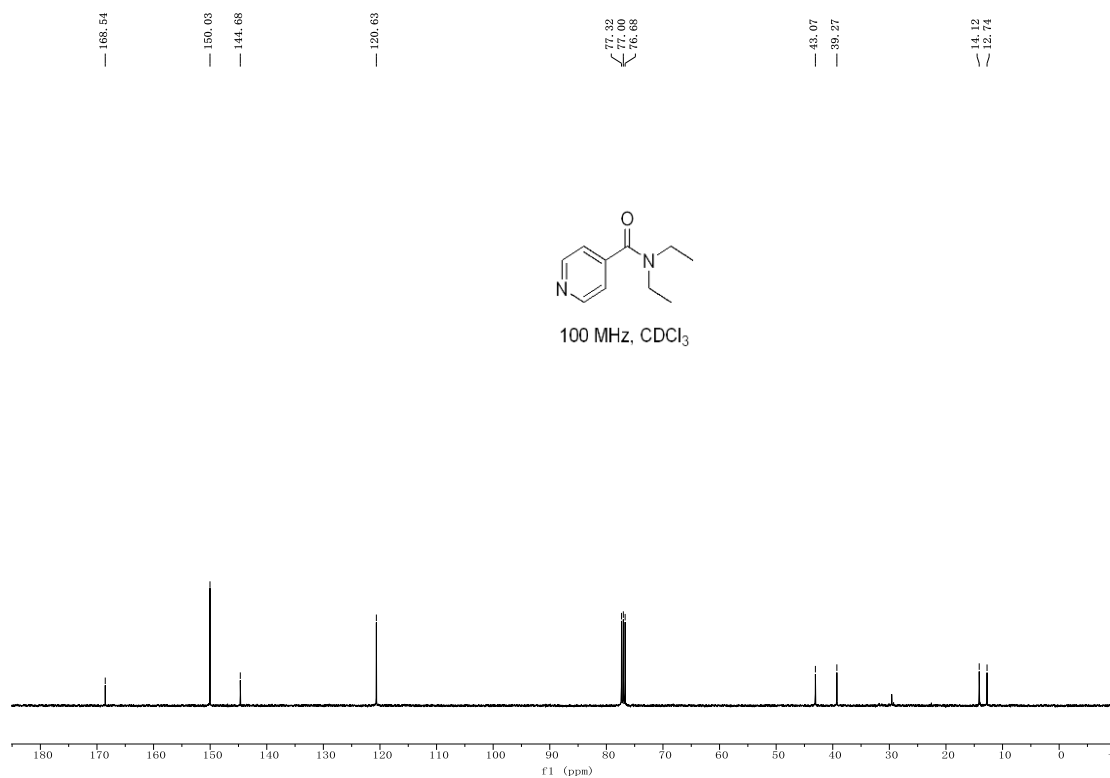

### 31-<sup>1</sup>H NMR

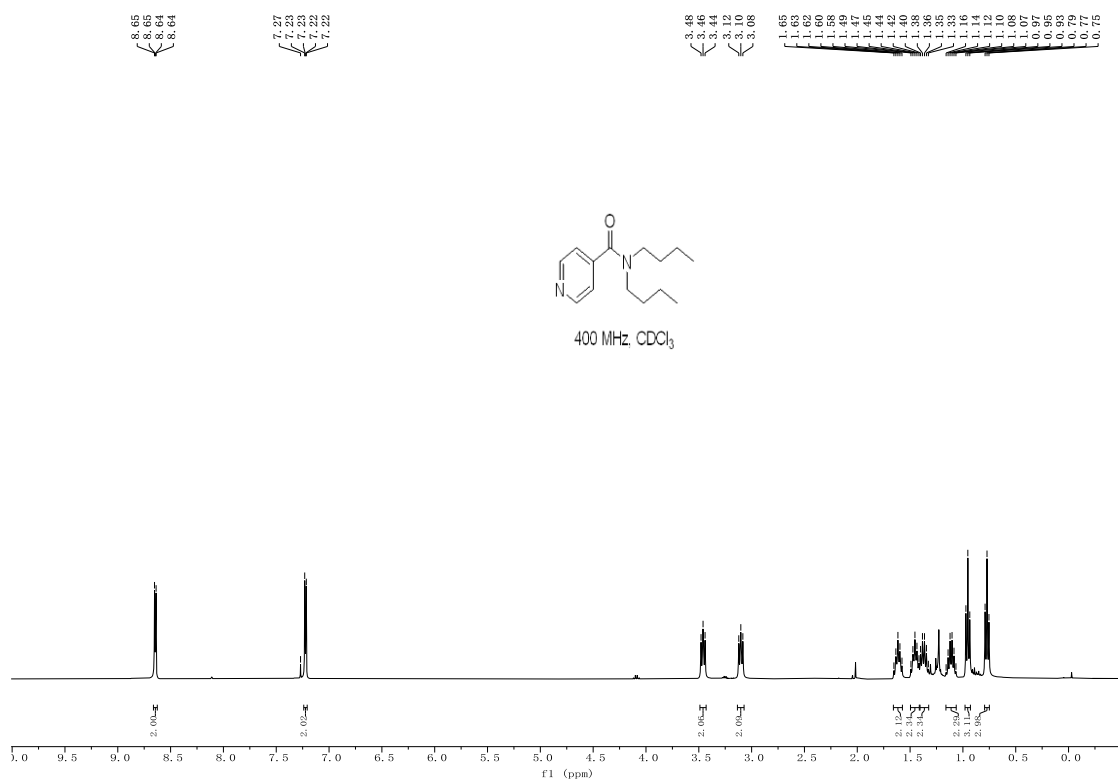

### 31-<sup>13</sup>C NMR

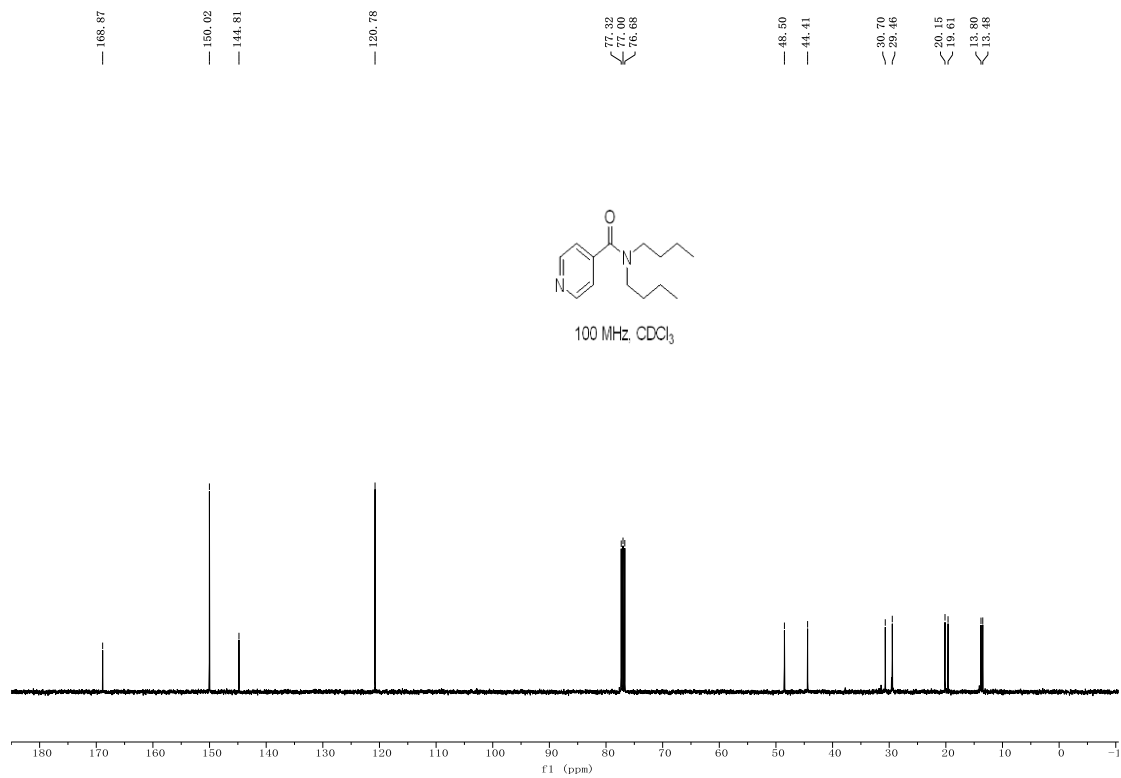

### 32-<sup>1</sup>H NMR

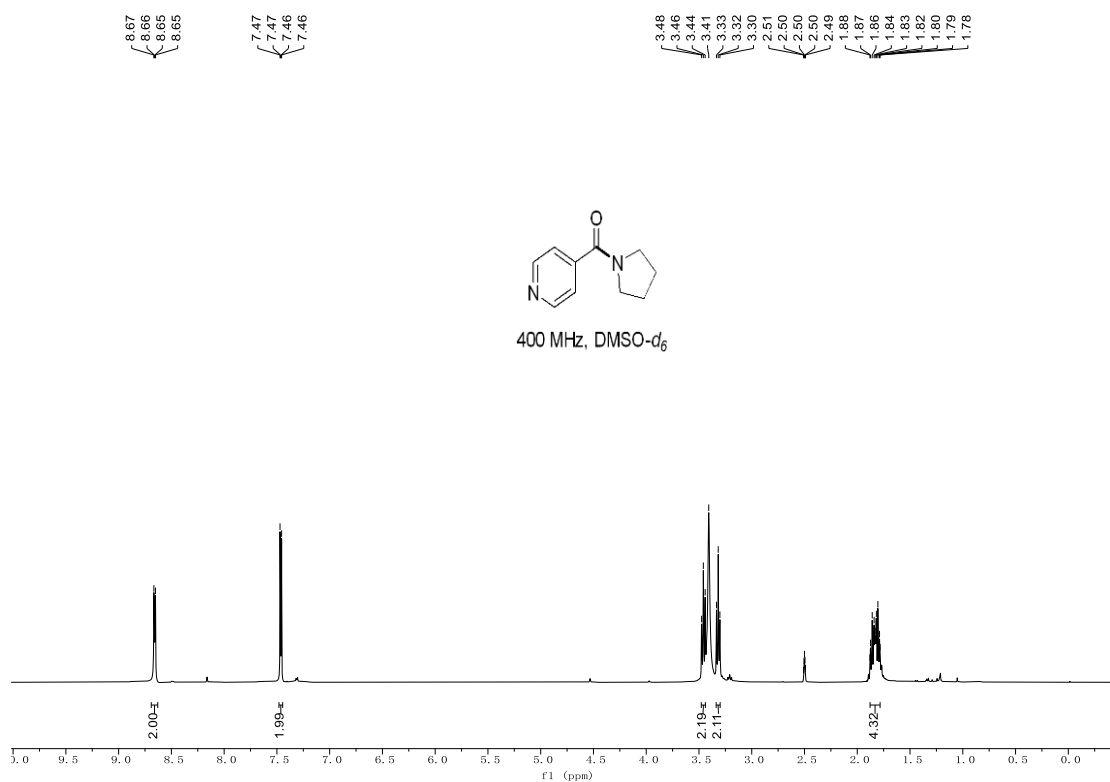

### 32-<sup>13</sup>C NMR

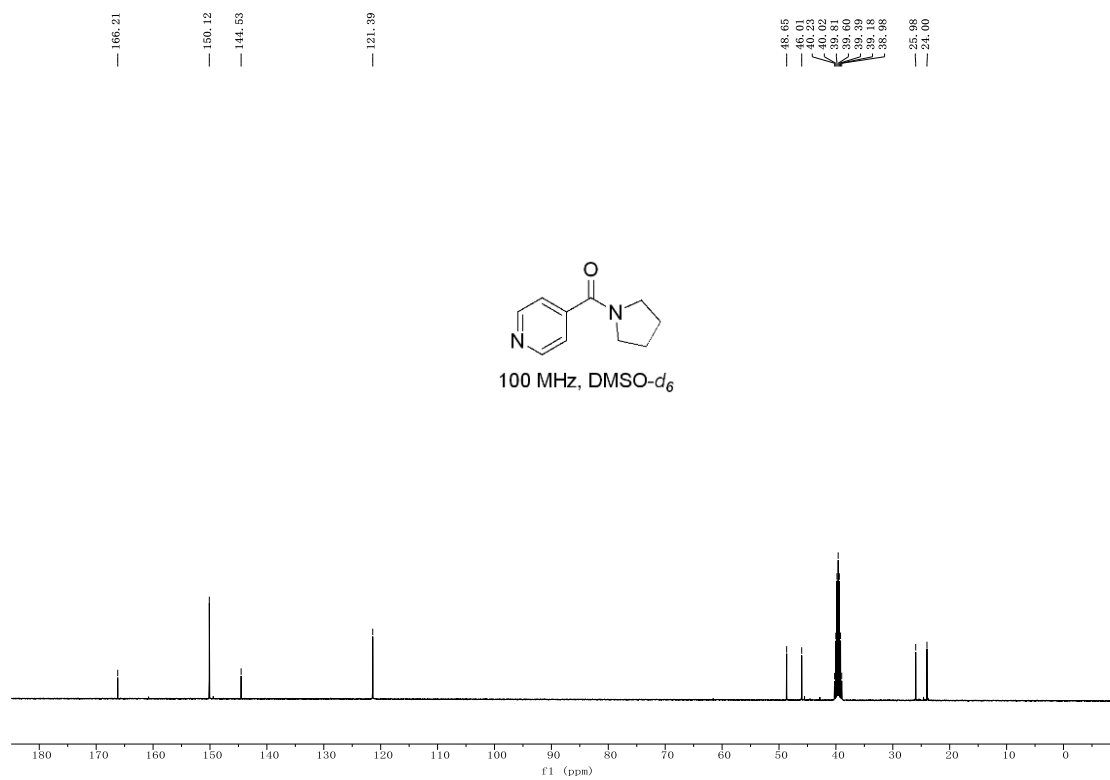



### 33-<sup>1</sup>H NMR

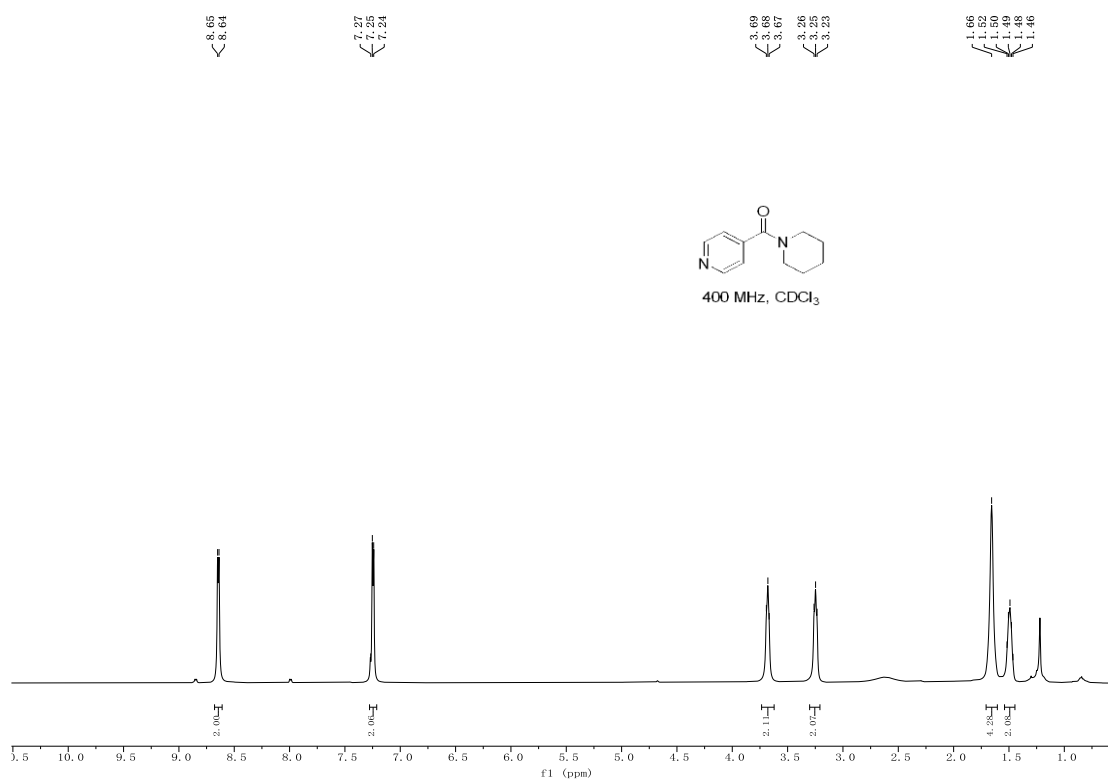

### 33-<sup>13</sup>C NMR

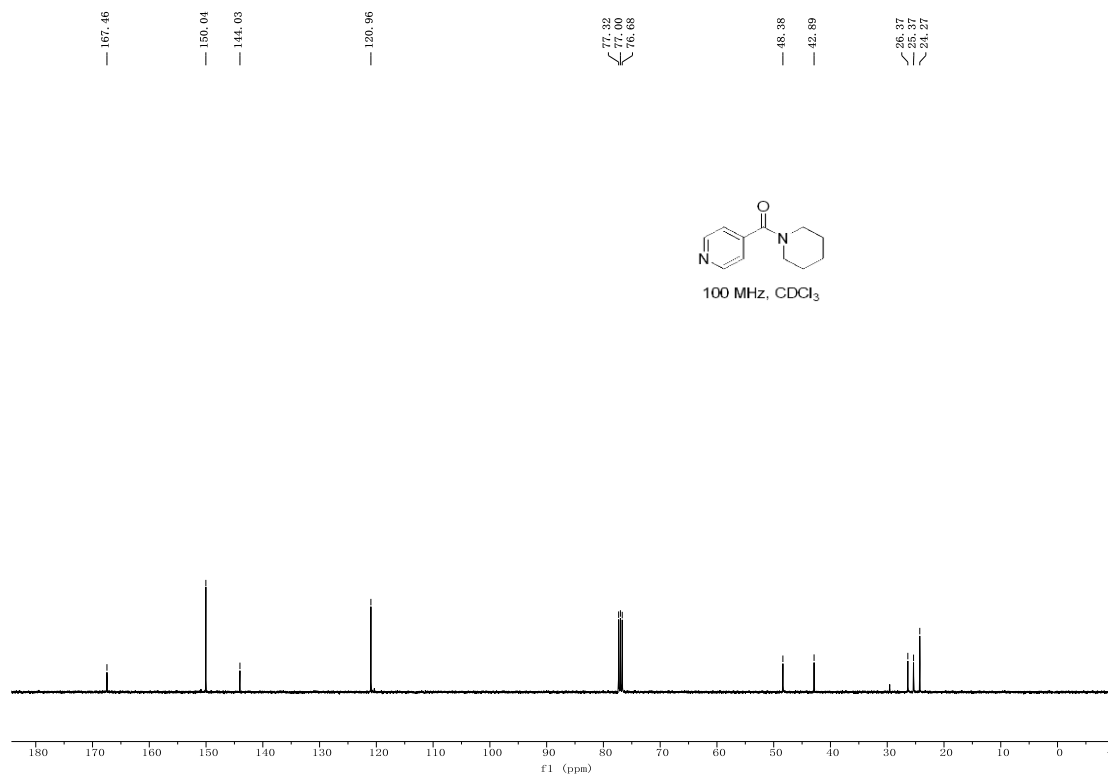

### 34-<sup>1</sup>H NMR

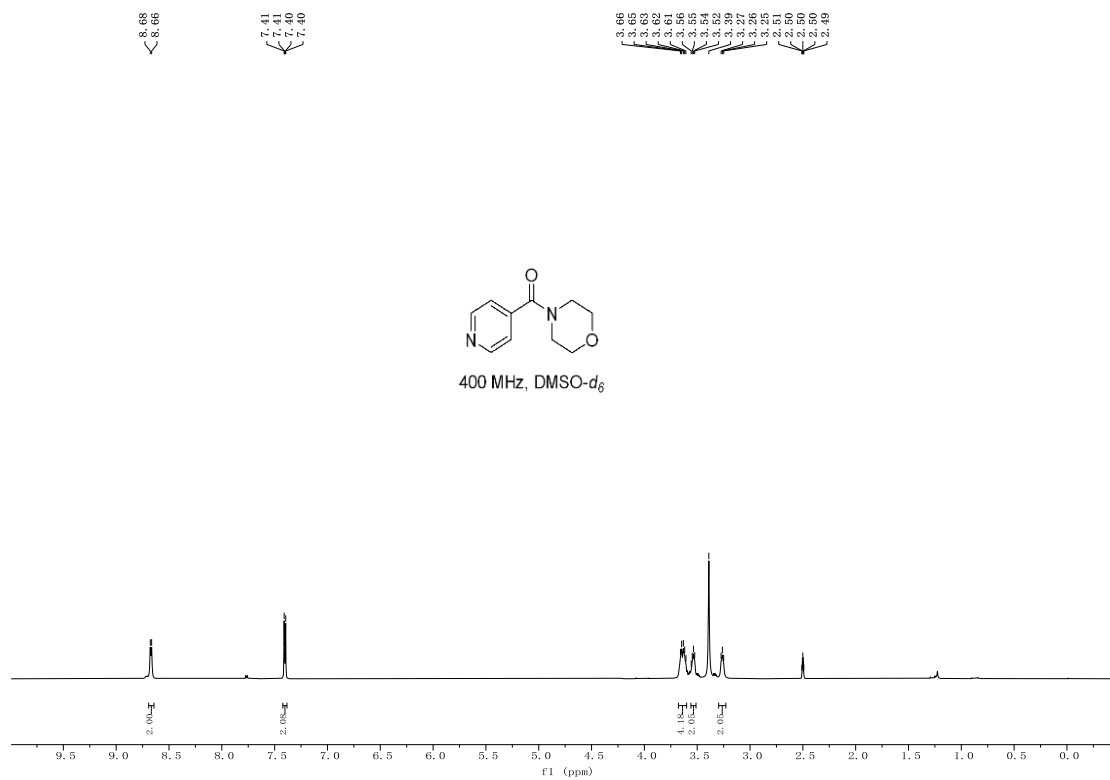

### 34-<sup>13</sup>C NMR

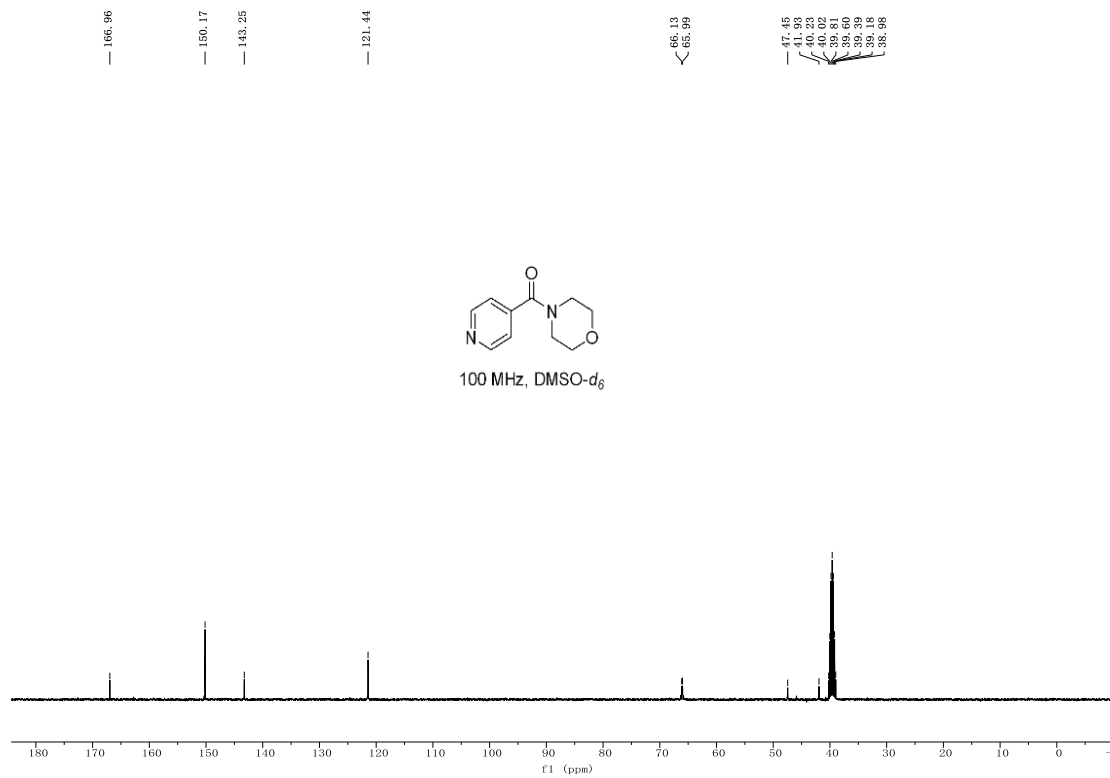

### 35-<sup>1</sup>H NMR

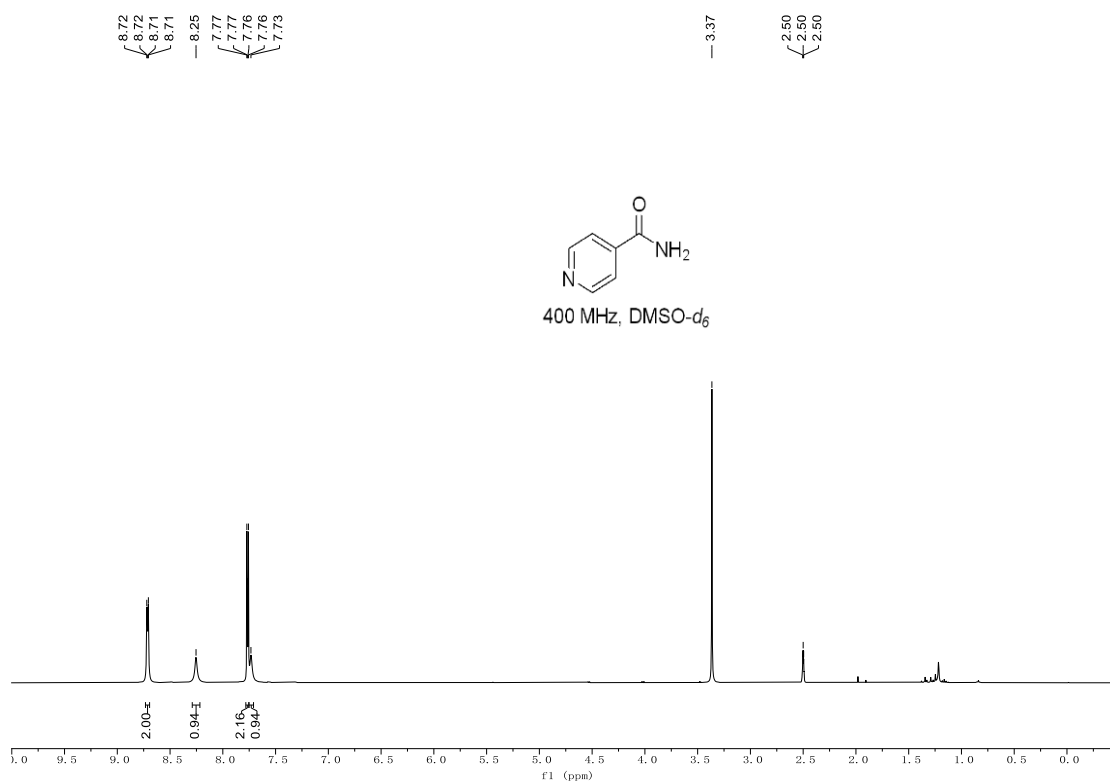

### 35-<sup>13</sup>C NMR

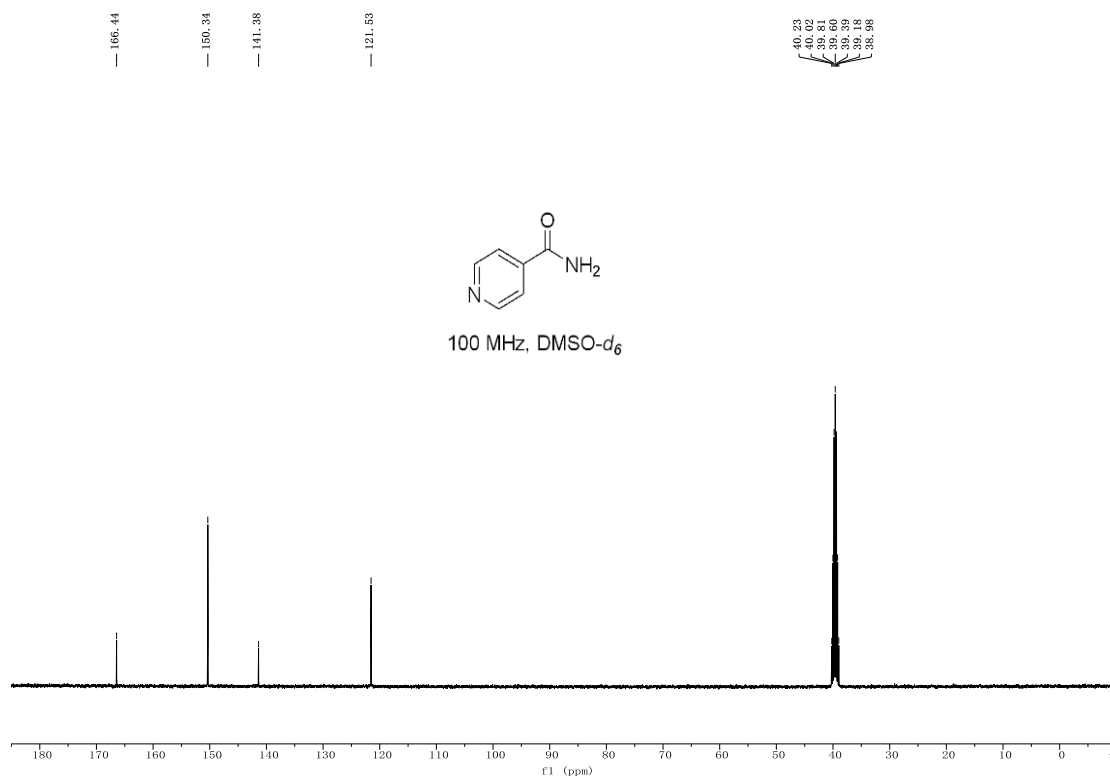

### 36-<sup>1</sup>H NMR

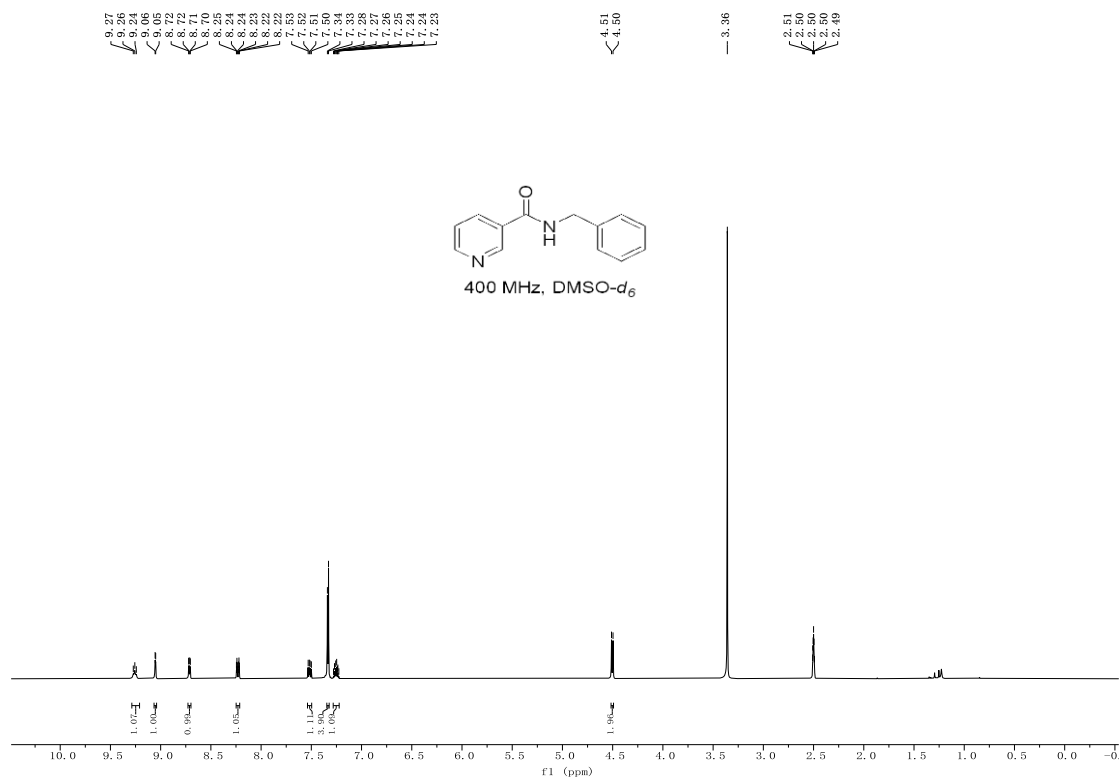

### 36-<sup>13</sup>C NMR

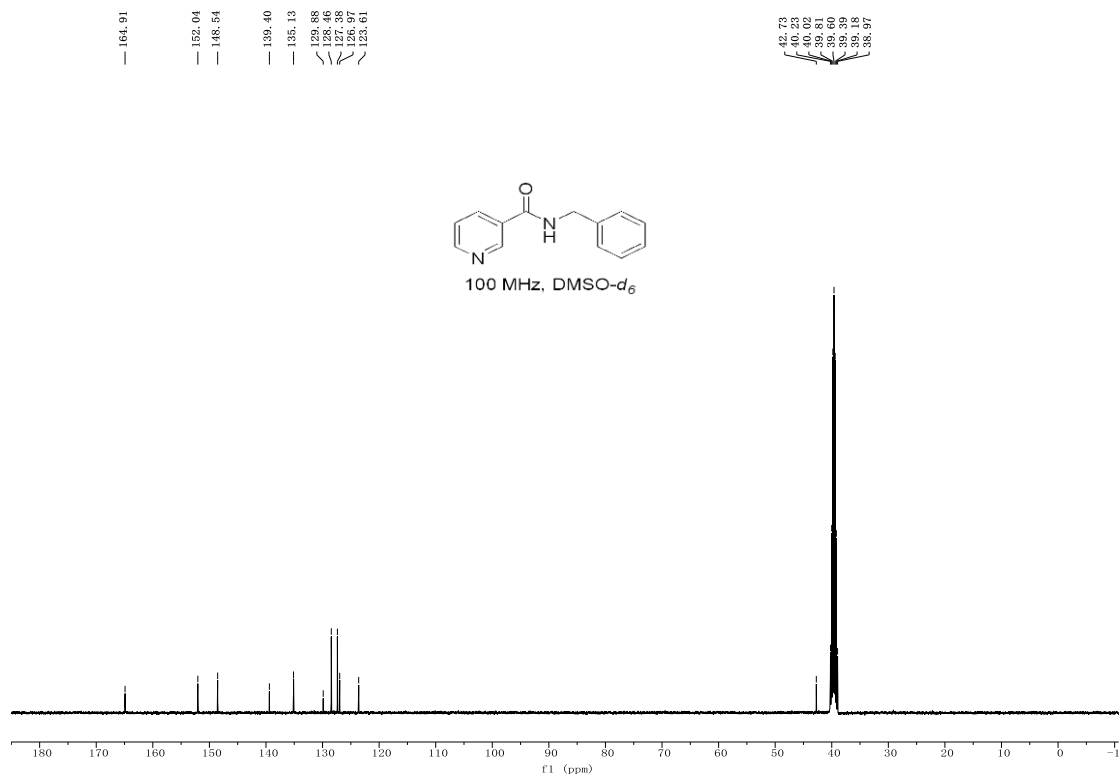

### 37-<sup>1</sup>H NMR

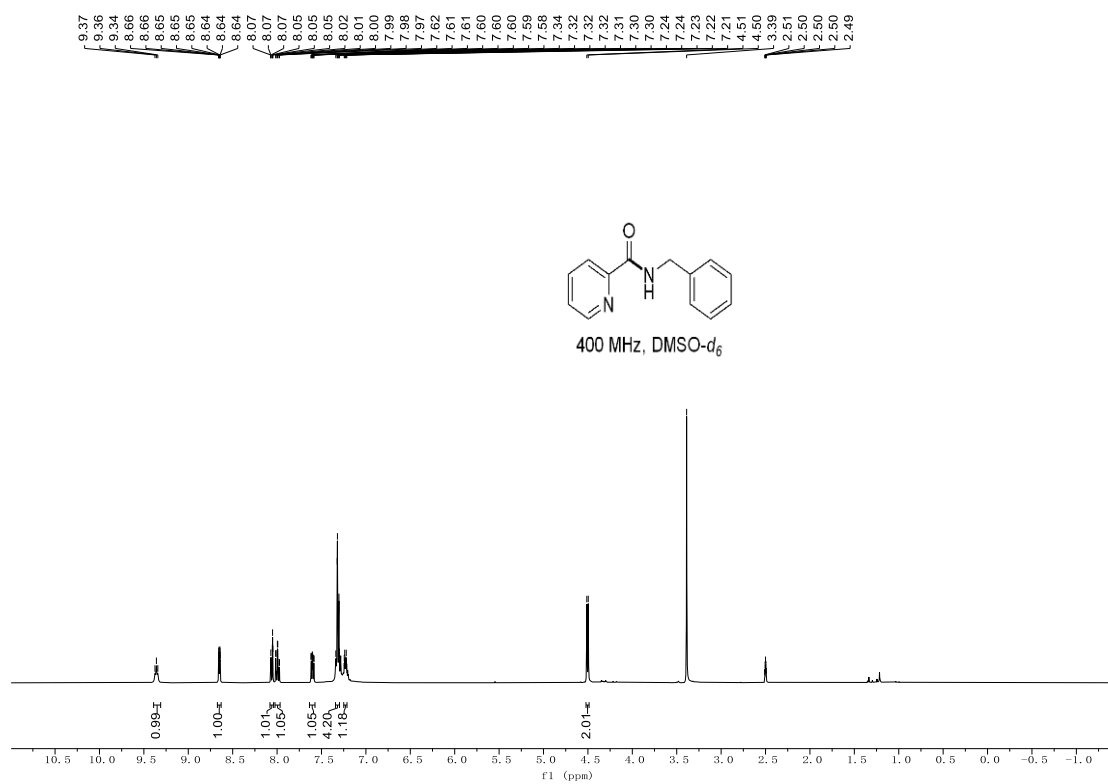

### 37-<sup>13</sup>C NMR

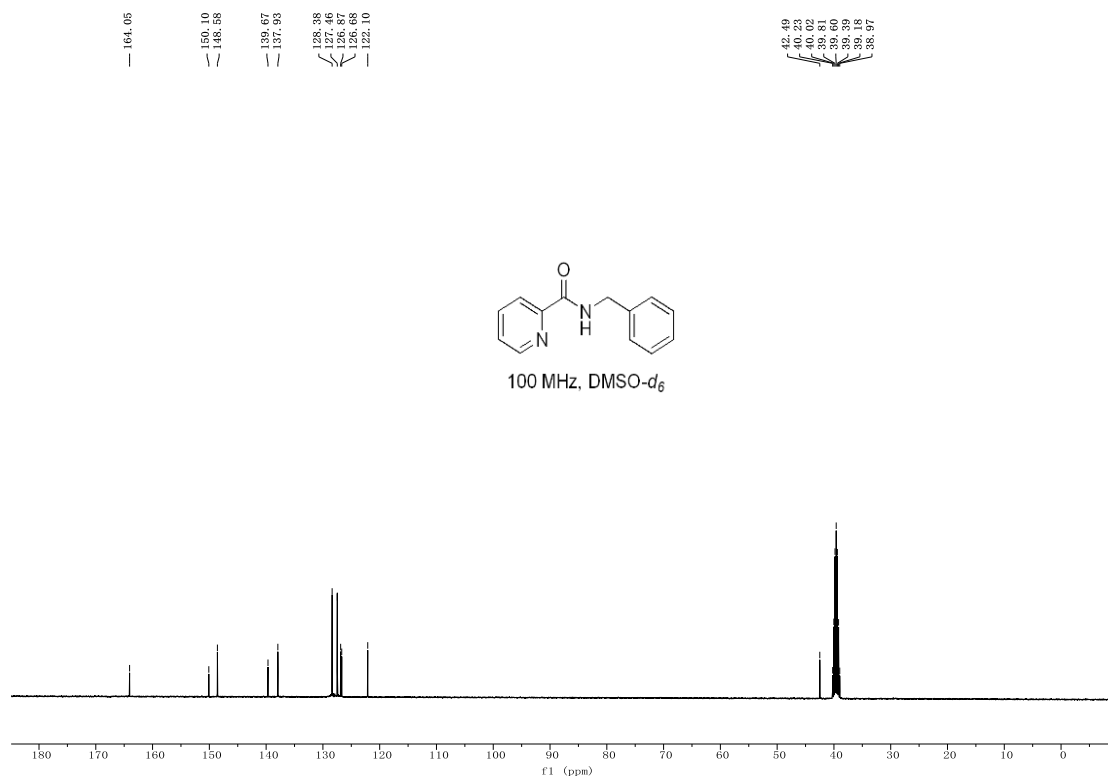

### 38-<sup>1</sup>H NMR

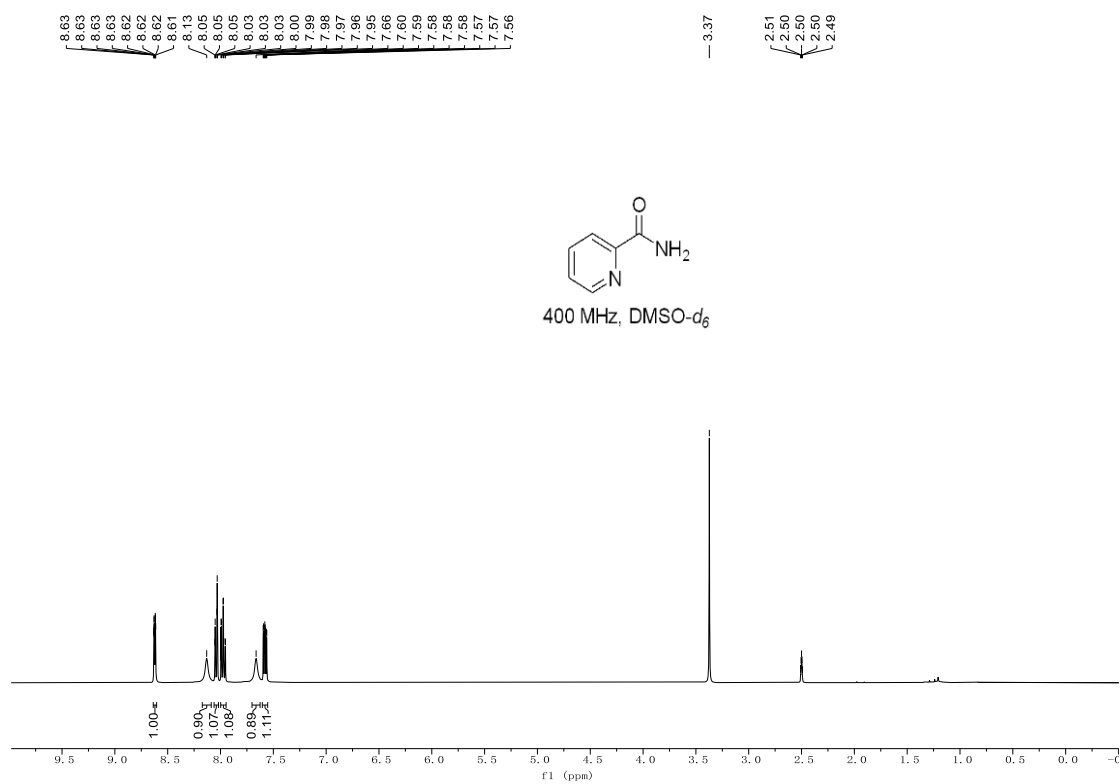

### 38-<sup>13</sup>C NMR

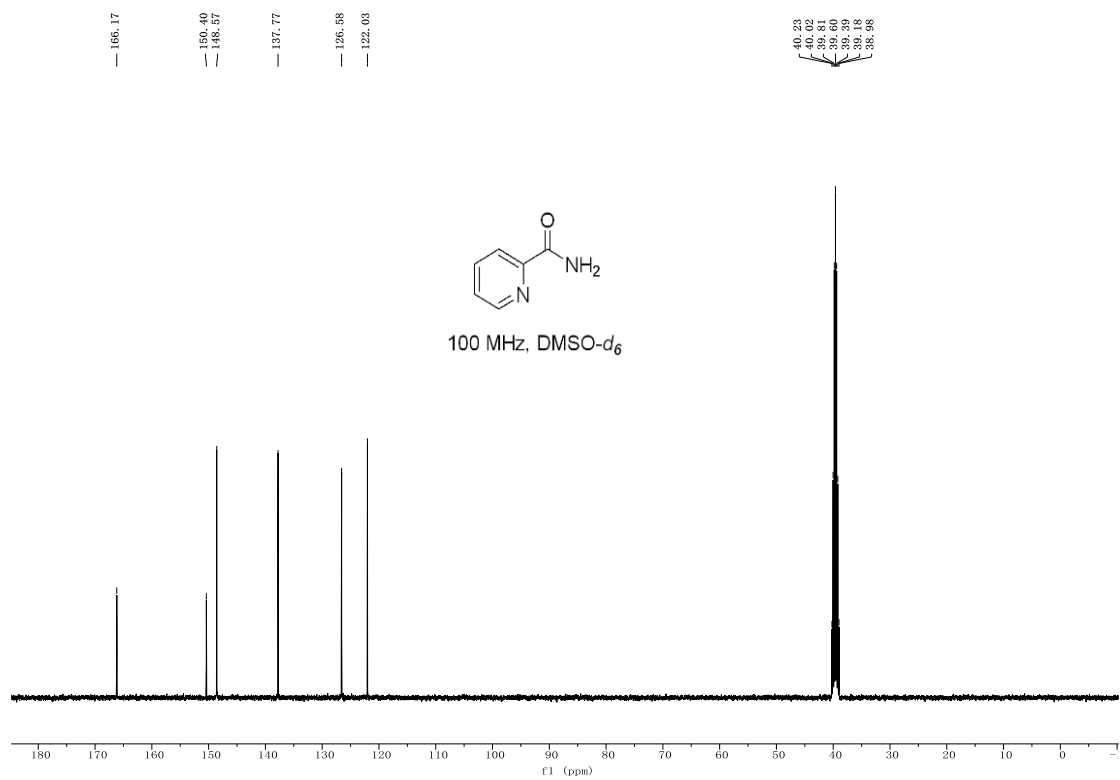

### 39-<sup>1</sup>H NMR

8.80  
8.79  
8.79  
8.78

7.87  
7.87  
7.86  
7.86

— 7.27

1.80  
1.77  
1.77  
1.76  
1.76  
1.70  
1.70  
1.69  
1.69  
1.69  
1.57  
1.48  
1.48  
1.46  
1.45  
1.44  
1.25  
1.10

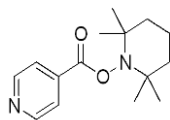

400 MHz, CDCl<sub>3</sub>

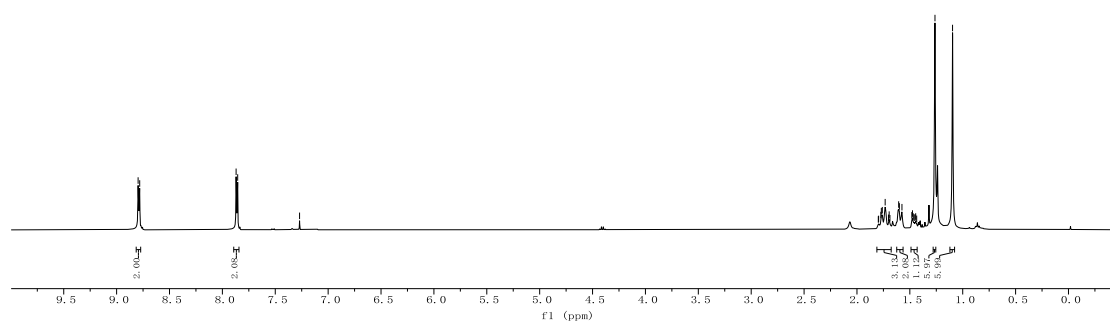

### 39-<sup>13</sup>C NMR

— 164.92

— 150.60

— 136.90

— 122.81

77.32  
77.00  
76.68

— 60.60

— 38.99

— 31.87

— 20.76

— 16.85

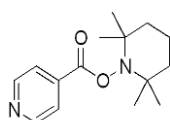

100 MHz, CDCl<sub>3</sub>

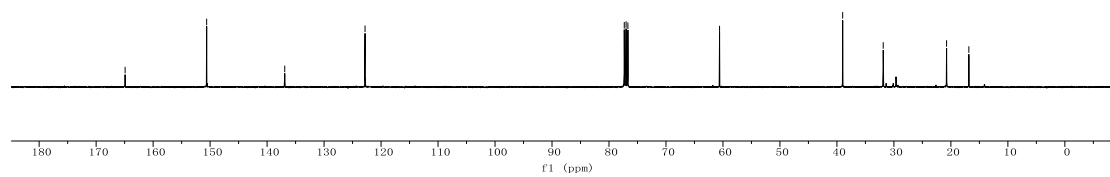

Supplement: d3qo01133j1.pdf [file d3qo01133j1.pdf]
